# Supplementary material for: Comprehensive Genomic Characterization Analysis of lncRNAs in Cells With Porcine Delta Coronavirus Infection
Source: Front Microbiol. 2020 Jan 28;10:3036. doi: 10.3389/fmicb.2019.03036 (PMC6999024; doi:10.3389/fmicb.2019.03036)
Supplement: Supplementary file 2 [file Table_2.XLSX]

## Sheet: Sheet1
Table S2.Annotated lncRNA information
Annotated_lncRNA_ID	Annotated_lncRNA_Gene_ID	Chromosome	Start	End	Strand
ALDBSSCT0000004214	ALDBSSCG0000002548	chr15	75585084	75626448	+
ALDBSSCT0000009170	ALDBSSCG0000005589	chr6	154790935	154792409	+
ENSSSCT00000033557	ENSSSCG00000030871	chr4	17429474	17517473	-
ALDBSSCT0000007483	ALDBSSCG0000004537	chr4	21883404	21888554	+
ALDBSSCT0000005782	ALDBSSCG0000003513	chr2	4448046	4450437	+
ALDBSSCT0000005785	ALDBSSCG0000003516	chr2	5806359	5814376	+
ALDBSSCT0000012069	ALDBSSCG0000007359	chrX	114202080	114292847	-
ALDBSSCT0000005422	ALDBSSCG0000003281	chr17	69072961	69075017	-
ALDBSSCT0000001128	ALDBSSCG0000000701	chr10	14062764	14065076	+
ALDBSSCT0000005132	ALDBSSCG0000003088	chr17	16315809	16336824	+
ALDBSSCT0000001041	ALDBSSCG0000000643	chr1	287001825	287230536	-
ALDBSSCT0000005130	ALDBSSCG0000003087	chr17	14918576	14933366	+
ALDBSSCT0000011638	ALDBSSCG0000007063	chr9	102937494	102941886	-
ALDBSSCT0000011567	ALDBSSCG0000007022	chr9	63784783	63785630	-
ENSSSCT00000036444	ENSSSCG00000007280	chr17	43030475	43114974	+
ENSSSCT00000034557	ENSSSCG00000004334	chr1	65524234	65542600	-
ALDBSSCT0000001049	ALDBSSCG0000000650	chr1	293388718	293419671	-
ALDBSSCT0000001048	ALDBSSCG0000000649	chr1	293271844	293275226	-
ALDBSSCT0000001124	ALDBSSCG0000000697	chr10	11930984	11931694	+
ALDBSSCT0000004957	ALDBSSCG0000003000	chr16	42881401	42882711	-
ALDBSSCT0000010889	ALDBSSCG0000006596	chr8	73918297	73931134	-
ALDBSSCT0000007327	ALDBSSCG0000004449	chr3	121802236	121807330	-
ALDBSSCT0000010911	ALDBSSCG0000006613	chr8	88142023	88143142	-
ALDBSSCT0000007987	ALDBSSCG0000004842	chr4	77200618	77206897	-
ALDBSSCT0000008377	ALDBSSCG0000005089	chr5	76445276	76447485	+
ALDBSSCT0000009393	ALDBSSCG0000005727	chr6	62967916	62978408	-
ALDBSSCT0000006234	ALDBSSCG0000003810	chr2	28720756	28723879	-
ALDBSSCT0000009391	ALDBSSCG0000005725	chr6	62305181	62318904	-
ALDBSSCT0000010910	ALDBSSCG0000006612	chr8	87669864	87676317	-
ALDBSSCT0000007328	ALDBSSCG0000004450	chr3	121968850	121979173	-
ALDBSSCT0000004922	ALDBSSCG0000002984	chr16	30600968	30607963	-
ALDBSSCT0000003243	ALDBSSCG0000001954	chr13	114820000	114826484	-
ALDBSSCT0000006989	ALDBSSCG0000004244	chr3	880419	893951	-
ALDBSSCT0000000331	ALDBSSCG0000000194	chr1	166188712	166189311	+
ALDBSSCT0000011350	ALDBSSCG0000006894	chr9	136226848	136229088	+
ALDBSSCT0000000232	ALDBSSCG0000000133	chr1	117531973	117628107	+
ALDBSSCT0000004357	ALDBSSCG0000002641	chr15	148033877	148037649	+
ALDBSSCT0000000236	ALDBSSCG0000000136	chr1	120407030	120411718	+
ALDBSSCT0000004352	ALDBSSCG0000002638	chr15	147200874	147223254	+
ALDBSSCT0000010888	ALDBSSCG0000006595	chr8	73273481	73320571	-
ALDBSSCT0000005550	ALDBSSCG0000003359	chr18	50120375	50138599	+
ALDBSSCT0000005553	ALDBSSCG0000003361	chr18	50987038	50991384	+
ALDBSSCT0000007632	ALDBSSCG0000004629	chr4	98215676	98216484	+
ALDBSSCT0000009981	ALDBSSCG0000006071	chr7	129734652	129738642	+
ALDBSSCT0000011084	ALDBSSCG0000006726	chr9	10966570	10971281	+
ALDBSSCT0000007631	ALDBSSCG0000004628	chr4	96968371	96968722	+
ALDBSSCT0000006180	ALDBSSCG0000003778	chr2	12903561	12909123	-
ALDBSSCT0000003527	ALDBSSCG0000002119	chr14	32692173	32701044	+
ALDBSSCT0000006247	ALDBSSCG0000003814	chr2	30848584	30849708	-
ALDBSSCT0000011316	ALDBSSCG0000006873	chr9	128650281	128651905	+
ALDBSSCT0000003523	ALDBSSCG0000002119	chr14	32691796	32701044	+
ALDBSSCT0000001957	ALDBSSCG0000001180	chr11	22626181	22627299	-
ALDBSSCT0000006599	ALDBSSCG0000004033	chr3	23545045	23547532	+
ALDBSSCT0000009149	ALDBSSCG0000005578	chr6	149360398	149380664	+
ALDBSSCT0000000729	ALDBSSCG0000000435	chr1	58615210	58650070	-
ALDBSSCT0000000728	ALDBSSCG0000000434	chr1	57834808	57839034	-
ALDBSSCT0000009903	ALDBSSCG0000006026	chr7	105420591	105421475	+
ALDBSSCT0000004812	ALDBSSCG0000002924	chr16	56277315	56331424	+
ALDBSSCT0000009326	ALDBSSCG0000005686	chr6	46558080	46563107	-
ALDBSSCT0000011654	ALDBSSCG0000007076	chr9	119153106	119157413	-
ALDBSSCT0000003003	ALDBSSCG0000001800	chr13	208453602	208456395	+
ALDBSSCT0000002627	ALDBSSCG0000001599	chr13	37891687	37901101	+
ALDBSSCT0000006047	ALDBSSCG0000003702	chr2	142447471	142462284	+
ALDBSSCT0000012024	ALDBSSCG0000007329	chrX	47152968	47160073	-
ALDBSSCT0000010121	ALDBSSCG0000006166	chr7	36501373	36507539	-
ALDBSSCT0000000804	ALDBSSCG0000000488	chr1	128182923	128199037	-
ALDBSSCT0000000805	ALDBSSCG0000000489	chr1	128898940	128913482	-
ALDBSSCT0000011369	ALDBSSCG0000006908	chr9	143964058	143970784	+
ALDBSSCT0000000807	ALDBSSCG0000000491	chr1	129055522	129059075	-
ALDBSSCT0000008302	ALDBSSCG0000005043	chr5	36601785	36602762	+
ALDBSSCT0000009949	ALDBSSCG0000006056	chr7	123823375	123849245	+
ALDBSSCT0000006773	ALDBSSCG0000004136	chr3	81815276	81817071	+
ALDBSSCT0000005992	ALDBSSCG0000003659	chr2	116128414	116449639	+
ALDBSSCT0000000522	ALDBSSCG0000000308	chr1	285502440	285616951	+
ALDBSSCT0000009186	ALDBSSCG0000005594	chr6	156399133	156413422	+
ALDBSSCT0000001250	ALDBSSCG0000000757	chr10	48120915	48122151	+
ALDBSSCT0000002816	ALDBSSCG0000001713	chr13	134136836	134148028	+
ALDBSSCT0000003229	ALDBSSCG0000001944	chr13	90659047	90739906	-
ALDBSSCT0000000795	ALDBSSCG0000000481	chr1	120698326	121032009	-
ALDBSSCT0000001706	ALDBSSCG0000001029	chr11	16390095	16391186	+
ALDBSSCT0000007057	ALDBSSCG0000004290	chr3	22227017	22233489	-
ALDBSSCT0000006510	ALDBSSCG0000003978	chr2	157383171	157384842	-
ALDBSSCT0000001311	ALDBSSCG0000000798	chr10	65994700	66012410	+
ALDBSSCT0000000652	ALDBSSCG0000000390	chr1	14316681	14317870	-
ALDBSSCT0000003221	ALDBSSCG0000001937	chr13	87209879	87255572	-
ALDBSSCT0000003220	ALDBSSCG0000001936	chr13	86560421	86562722	-
ALDBSSCT0000011816	ALDBSSCG0000007172	GL893661.1	30053	32027	+
ALDBSSCT0000002608	ALDBSSCG0000001586	chr13	33028643	33029672	+
ALDBSSCT0000002609	ALDBSSCG0000001587	chr13	33878497	33888233	+
ALDBSSCT0000003730	ALDBSSCG0000002232	chr14	117938849	118004721	+
ALDBSSCT0000010148	ALDBSSCG0000006179	chr7	42862953	43010635	-
ALDBSSCT0000005588	ALDBSSCG0000003380	chr18	56115355	56192888	+
ALDBSSCT0000000150	ALDBSSCG0000000087	chr1	65444684	65448060	+
ALDBSSCT0000000098	ALDBSSCG0000000059	chr1	36884546	36886424	+
ALDBSSCT0000006187	ALDBSSCG0000003784	chr2	17593047	17599056	-
ALDBSSCT0000002350	ALDBSSCG0000001423	chr12	6270091	6271985	-
ALDBSSCT0000008289	ALDBSSCG0000005033	chr5	23093801	23095966	+
ALDBSSCT0000002356	ALDBSSCG0000001428	chr12	8799604	8820550	-
ALDBSSCT0000002357	ALDBSSCG0000001428	chr12	8816348	8820550	-
ALDBSSCT0000010490	ALDBSSCG0000006366	chr8	58643037	58644377	+
ALDBSSCT0000008513	ALDBSSCG0000005178	chr5	15758634	15786919	-
ALDBSSCT0000008921	ALDBSSCG0000005453	chr6	64595123	64595908	+
ALDBSSCT0000011457	ALDBSSCG0000006971	chr9	19574150	19609253	-
ALDBSSCT0000006185	ALDBSSCG0000003782	chr2	15741994	15763434	-
ALDBSSCT0000002329	ALDBSSCG0000001407	chr12	1261275	1262488	-
ALDBSSCT0000002327	ALDBSSCG0000001405	chr12	952107	957120	-
ALDBSSCT0000006669	ALDBSSCG0000004077	chr3	41514839	41525893	+
ALDBSSCT0000007047	ALDBSSCG0000004287	chr3	19939741	19945968	-
ALDBSSCT0000009181	ALDBSSCG0000005593	chr6	156127454	156128279	+
ENSSSCT00000021958	ENSSSCG00000020363	chr2	81351131	81351408	+
ENSSSCT00000033169	ENSSSCG00000030936	chrX	109585808	109620212	+
ALDBSSCT0000011928	ALDBSSCG0000007260	chrX	51200470	51338009	+
ALDBSSCT0000007748	ALDBSSCG0000004701	chr4	137048913	137059041	+
ALDBSSCT0000011677	ALDBSSCG0000007091	chr9	129016328	129030354	-
ALDBSSCT0000011969	ALDBSSCG0000007286	chrX	116163442	116164178	+
ALDBSSCT0000002237	ALDBSSCG0000001345	chr12	37344339	37346659	+
ALDBSSCT0000010856	ALDBSSCG0000006576	chr8	57410200	57417376	-
ALDBSSCT0000001248	ALDBSSCG0000000756	chr10	47712356	47727977	+
ALDBSSCT0000011526	ALDBSSCG0000007003	chr9	46890871	46892035	-
ALDBSSCT0000009651	ALDBSSCG0000005890	chr7	13322223	13327937	+
ALDBSSCT0000000528	ALDBSSCG0000000311	chr1	286841154	286855019	+
ALDBSSCT0000011893	ALDBSSCG0000007232	chrX	4762740	4765111	+
ALDBSSCT0000003826	ALDBSSCG0000002301	chr14	22186537	22200568	-
ALDBSSCT0000003825	ALDBSSCG0000002300	chr14	22035852	22043232	-
ENSSSCT00000021690	ENSSSCG00000020095	chr1	35489275	35489549	-
ALDBSSCT0000009907	ALDBSSCG0000006029	chr7	106107725	106112169	+
ALDBSSCT0000004381	ALDBSSCG0000002661	chr15	3551455	3570375	-
ALDBSSCT0000005903	ALDBSSCG0000003601	chr2	65166151	65167582	+
ALDBSSCT0000009340	ALDBSSCG0000005696	chr6	51913729	51917512	-
ALDBSSCT0000009341	ALDBSSCG0000005697	chr6	51995849	52001371	-
ALDBSSCT0000010749	ALDBSSCG0000006504	chr8	6818335	6819049	-
ALDBSSCT0000003987	ALDBSSCG0000002399	chr14	82372929	82373772	-
ALDBSSCT0000000578	ALDBSSCG0000000344	chr1	312908626	312914559	+
ALDBSSCT0000000579	ALDBSSCG0000000345	chr1	312938939	312952738	+
ALDBSSCT0000002698	ALDBSSCG0000001638	chr13	85347227	85351630	+
ALDBSSCT0000002107	ALDBSSCG0000001267	chr12	686846	689923	+
ALDBSSCT0000002106	ALDBSSCG0000001267	chr12	686795	756492	+
ALDBSSCT0000008920	ALDBSSCG0000005452	chr6	64231178	64269575	+
ALDBSSCT0000002102	ALDBSSCG0000001264	chr11	87014585	87016789	-
ALDBSSCT0000002101	ALDBSSCG0000001263	chr11	86485295	86489001	-
ALDBSSCT0000002452	ALDBSSCG0000001486	chr12	44331176	44337539	-
ALDBSSCT0000007892	ALDBSSCG0000004777	chr4	16432123	16433479	-
ALDBSSCT0000005675	ALDBSSCG0000003444	chr18	26473421	26477680	-
ALDBSSCT0000006952	ALDBSSCG0000004222	chr3	135895966	135898502	+
ALDBSSCT0000006500	ALDBSSCG0000003971	chr2	153519247	153527576	-
ALDBSSCT0000002459	ALDBSSCG0000001489	chr12	45147537	45150512	-
ALDBSSCT0000002108	ALDBSSCG0000001267	chr12	686885	772840	+
ALDBSSCT0000004722	ALDBSSCG0000002874	chr16	23227879	23235044	+
ALDBSSCT0000011106	ALDBSSCG0000006741	chr9	22266731	22276078	+
ALDBSSCT0000004724	ALDBSSCG0000002875	chr16	24402313	24428927	+
ALDBSSCT0000008529	ALDBSSCG0000005190	chr5	23100501	23101268	-
ALDBSSCT0000007254	ALDBSSCG0000004398	chr3	89907832	89923737	-
ALDBSSCT0000002219	ALDBSSCG0000001332	chr12	24884118	24888554	+
ALDBSSCT0000002218	ALDBSSCG0000001331	chr12	24866948	24869670	+
ENSSSCT00000021723	ENSSSCG00000020128	chr9	138727106	138727335	+
ENSSSCT00000033402	ENSSSCG00000030758	chr15	43209020	43211863	+
ALDBSSCT0000007114	ALDBSSCG0000004330	chr3	40884942	40888371	-
ALDBSSCT0000007112	ALDBSSCG0000004328	chr3	40423332	40424424	-
ALDBSSCT0000007111	ALDBSSCG0000004327	chr3	40257363	40259688	-
ALDBSSCT0000001413	ALDBSSCG0000000856	chr10	13669071	13737338	-
ALDBSSCT0000011922	ALDBSSCG0000007255	chrX	41304726	41305717	+
ALDBSSCT0000004077	ALDBSSCG0000002467	chr14	145928321	145990199	-
ALDBSSCT0000010443	ALDBSSCG0000006345	chr8	33609152	33748574	+
ALDBSSCT0000006589	ALDBSSCG0000004026	chr3	19790861	19791759	+
ALDBSSCT0000004318	ALDBSSCG0000002613	chr15	130973050	130992831	+
ALDBSSCT0000008507	ALDBSSCG0000005173	chr5	11962122	11963744	-
ALDBSSCT0000002171	ALDBSSCG0000001297	chr12	12472762	12487532	+
ALDBSSCT0000007805	ALDBSSCG0000004727	chr4	142929995	142938433	+
ALDBSSCT0000010300	ALDBSSCG0000006261	chr7	109543897	109545753	-
ALDBSSCT0000010728	ALDBSSCG0000006491	chr8	946562	952482	-
ALDBSSCT0000002070	ALDBSSCG0000001246	chr11	82951896	82952593	-
ALDBSSCT0000005375	ALDBSSCG0000003251	chr17	54301868	54306646	-
ALDBSSCT0000005377	ALDBSSCG0000003253	chr17	54600160	54603445	-
ALDBSSCT0000008885	ALDBSSCG0000005431	chr6	57187590	57192986	+
ALDBSSCT0000008299	ALDBSSCG0000005041	chr5	35847668	35852074	+
ALDBSSCT0000011138	ALDBSSCG0000006756	chr9	32511839	32566579	+
ALDBSSCT0000006786	ALDBSSCG0000004143	chr3	90381847	90390082	+
ALDBSSCT0000011881	ALDBSSCG0000007226	JH118898.1	134899	140600	+
ALDBSSCT0000001009	ALDBSSCG0000000622	chr1	271525259	271530089	-
ALDBSSCT0000002779	ALDBSSCG0000001685	chr13	117682949	117684859	+
ALDBSSCT0000005174	ALDBSSCG0000003124	chr17	47119459	47122536	+
ALDBSSCT0000005173	ALDBSSCG0000003123	chr17	46934439	46935439	+
ALDBSSCT0000001002	ALDBSSCG0000000615	chr1	264992677	265047743	-
ALDBSSCT0000001001	ALDBSSCG0000000614	chr1	264670023	264672295	-
ALDBSSCT0000008518	ALDBSSCG0000005182	chr5	18862176	18872768	-
ALDBSSCT0000010721	ALDBSSCG0000006488	chr8	115218	128773	-
ALDBSSCT0000010172	ALDBSSCG0000006195	chr7	60624571	60647062	-
ALDBSSCT0000007166	ALDBSSCG0000004354	chr3	51850718	51853752	-
ALDBSSCT0000007167	ALDBSSCG0000004355	chr3	52023548	52030455	-
ALDBSSCT0000010726	ALDBSSCG0000006491	chr8	946562	952314	-
ALDBSSCT0000010906	ALDBSSCG0000006608	chr8	80996717	81083144	-
ALDBSSCT0000010081	ALDBSSCG0000006137	chr7	22478372	22480123	-
ALDBSSCT0000010080	ALDBSSCG0000006137	chr7	22478372	22480123	-
ALDBSSCT0000007168	ALDBSSCG0000004355	chr3	52023548	52030784	-
ENSSSCT00000032953	ENSSSCG00000030923	chr7	29352892	29356446	-
ALDBSSCT0000011141	ALDBSSCG0000006758	chr9	34636586	34856669	+
ALDBSSCT0000009461	ALDBSSCG0000005770	chr6	90721672	90724653	-
ALDBSSCT0000002589	ALDBSSCG0000001574	chr13	25498743	25509991	+
ALDBSSCT0000002588	ALDBSSCG0000001573	chr13	25460266	25460847	+
ALDBSSCT0000008713	ALDBSSCG0000005316	chr6	3490505	3492061	+
ALDBSSCT0000007366	ALDBSSCG0000004471	chr3	137665475	137665993	-
ALDBSSCT0000000079	ALDBSSCG0000000046	chr1	24539002	24542146	+
ALDBSSCT0000000377	ALDBSSCG0000000227	chr1	200173307	200174581	+
ALDBSSCT0000007414	ALDBSSCG0000004493	chr4	2167846	2169852	+
ALDBSSCT0000003917	ALDBSSCG0000002355	chr14	54510427	54511319	-
ALDBSSCT0000007821	ALDBSSCG0000004736	chr4	1006363	1008315	-
ALDBSSCT0000003915	ALDBSSCG0000002354	chr14	52322075	52323011	-
ALDBSSCT0000003914	ALDBSSCG0000002353	chr14	51015689	51017214	-
ALDBSSCT0000004544	ALDBSSCG0000002762	chr15	94610939	94611392	-
ALDBSSCT0000008524	ALDBSSCG0000005186	chr5	20659673	20662700	-
ALDBSSCT0000005452	ALDBSSCG0000003302	chr18	8550430	8553365	+
ALDBSSCT0000004542	ALDBSSCG0000002761	chr15	93489133	93491821	-
ALDBSSCT0000006738	ALDBSSCG0000004112	chr3	58847852	58912933	+
ENSSSCT00000033761	ENSSSCG00000030860	chrX	21645222	21645390	+
ALDBSSCT0000005106	ALDBSSCG0000003075	chr16	86650192	86667721	-
ALDBSSCT0000005105	ALDBSSCG0000003075	chr16	86644082	86667721	-
ALDBSSCT0000001173	ALDBSSCG0000000726	chr10	29076622	29083257	+
ALDBSSCT0000001171	ALDBSSCG0000000724	chr10	27921583	27926499	+
ENSSSCT00000033052	ENSSSCG00000031028	chrX	41061659	41063153	+
ALDBSSCT0000001850	ALDBSSCG0000001115	chr11	203640	220289	-
ALDBSSCT0000007825	ALDBSSCG0000004740	chr4	1448002	1450982	-
ALDBSSCT0000011245	ALDBSSCG0000006829	chr9	74390609	74393783	+
ALDBSSCT0000011356	ALDBSSCG0000006897	chr9	137663830	137725093	+
ALDBSSCT0000006660	ALDBSSCG0000004072	chr3	40600908	40602602	+
ENSSSCT00000019363	ENSSSCG00000017791	chr12	47804246	47866823	+
ALDBSSCT0000011353	ALDBSSCG0000006896	chr9	137020289	137025834	+
ALDBSSCT0000010174	ALDBSSCG0000006197	chr7	61955263	61956016	-
ALDBSSCT0000001912	ALDBSSCG0000001157	chr11	14257314	14259257	-
ALDBSSCT0000009906	ALDBSSCG0000006029	chr7	106107553	106112169	+
ALDBSSCT0000005587	ALDBSSCG0000003380	chr18	56115319	56192888	+
ALDBSSCT0000004915	ALDBSSCG0000002980	chr16	29270216	29272597	-
ALDBSSCT0000006169	ALDBSSCG0000003772	chr2	10369906	10372289	-
ALDBSSCT0000005583	ALDBSSCG0000003377	chr18	55401734	55403082	+
ALDBSSCT0000009236	ALDBSSCG0000005628	chr6	12429782	12432301	-
ALDBSSCT0000009901	ALDBSSCG0000006024	chr7	105215654	105229985	+
ALDBSSCT0000011687	ALDBSSCG0000007099	chr9	132888690	132889330	-
ALDBSSCT0000011254	ALDBSSCG0000006835	chr9	80845311	80972140	+
ALDBSSCT0000006249	ALDBSSCG0000003815	chr2	30980287	30986006	-
ALDBSSCT0000004851	ALDBSSCG0000002945	chr16	78119274	78129719	+
ALDBSSCT0000006986	ALDBSSCG0000004241	chr3	853574	862528	-
ALDBSSCT0000012041	ALDBSSCG0000007340	chrX	68862692	68870587	-
ENSSSCT00000020430	ENSSSCG00000018835	chr14	138442959	138443263	-
ALDBSSCT0000007521	ALDBSSCG0000004564	chr4	44646077	44651760	+
ALDBSSCT0000004383	ALDBSSCG0000002663	chr15	8167430	8187632	-
ALDBSSCT0000008011	ALDBSSCG0000004857	chr4	82551038	82560074	-
ALDBSSCT0000001980	ALDBSSCG0000001195	chr11	49268518	49275334	-
ALDBSSCT0000004264	ALDBSSCG0000002581	chr15	97082576	97097538	+
ALDBSSCT0000007931	ALDBSSCG0000004805	chr4	36357246	36359669	-
ALDBSSCT0000007528	ALDBSSCG0000004567	chr4	45525295	45526031	+
ALDBSSCT0000005897	ALDBSSCG0000003596	chr2	59273927	59276067	+
ALDBSSCT0000004262	ALDBSSCG0000002581	chr15	97079916	97084396	+
ENSSSCT00000032811	ENSSSCG00000030756	chrX	6072242	6097234	-
ALDBSSCT0000008862	ALDBSSCG0000005416	chr6	51770940	51771954	+
ALDBSSCT0000006322	ALDBSSCG0000003865	chr2	70868443	70894607	-
ALDBSSCT0000007063	ALDBSSCG0000004294	chr3	24272678	24280784	-
ALDBSSCT0000007634	ALDBSSCG0000004631	chr4	98552102	98554465	+
ALDBSSCT0000007061	ALDBSSCG0000004293	chr3	24066870	24120934	-
ALDBSSCT0000011077	ALDBSSCG0000006721	chr9	10099106	10103058	+
ALDBSSCT0000011463	ALDBSSCG0000006974	chr9	21859589	21863291	-
ALDBSSCT0000004187	ALDBSSCG0000002534	chr15	59735229	59792303	+
ALDBSSCT0000001353	ALDBSSCG0000000829	chr10	76375888	76390418	+
ALDBSSCT0000008939	ALDBSSCG0000005469	chr6	76014214	76018041	+
ALDBSSCT0000008818	ALDBSSCG0000005385	chr6	41691324	41692554	+
ALDBSSCT0000008931	ALDBSSCG0000005462	chr6	72801072	72803018	+
ALDBSSCT0000004714	ALDBSSCG0000002868	chr16	18237638	18284347	+
ALDBSSCT0000003174	ALDBSSCG0000001910	chr13	73148368	73153144	-
ALDBSSCT0000005808	ALDBSSCG0000003528	chr2	9689967	9693663	+
ALDBSSCT0000008729	ALDBSSCG0000005325	chr6	7608364	7615604	+
ALDBSSCT0000009654	ALDBSSCG0000005891	chr7	13825878	13848657	+
ALDBSSCT0000008482	ALDBSSCG0000005157	chr5	3175300	3176464	-
ALDBSSCT0000006016	ALDBSSCG0000003679	chr2	128555180	128559904	+
ALDBSSCT0000006041	ALDBSSCG0000003697	chr2	140090714	140094314	+
ALDBSSCT0000010892	ALDBSSCG0000006599	chr8	74840311	74846715	-
ALDBSSCT0000003178	ALDBSSCG0000001913	chr13	74958491	75088238	-
ALDBSSCT0000005191	ALDBSSCG0000003133	chr17	51779294	51869299	+
ALDBSSCT0000006605	ALDBSSCG0000004037	chr3	25776844	25779795	+
ALDBSSCT0000008231	ALDBSSCG0000004997	chr5	1531036	1534106	+
ALDBSSCT0000008263	ALDBSSCG0000005013	chr5	13220029	13223917	+
ALDBSSCT0000008104	ALDBSSCG0000004919	chr4	114667406	114669450	-
ENSSSCT00000036045	ENSSSCG00000004943	chr1	182187872	182222849	-
ENSSSCT00000034147	ENSSSCG00000017791	chr12	47804289	47866851	+
ALDBSSCT0000008933	ALDBSSCG0000005464	chr6	73950841	73958329	+
ALDBSSCT0000007423	ALDBSSCG0000004498	chr4	6694717	6700193	+
ALDBSSCT0000007667	ALDBSSCG0000004657	chr4	109080998	109083204	+
ALDBSSCT0000007980	ALDBSSCG0000004837	chr4	73785549	73799648	-
ALDBSSCT0000006542	ALDBSSCG0000003999	chr3	6414912	6419954	+
ALDBSSCT0000006328	ALDBSSCG0000003870	chr2	74635388	74641394	-
ALDBSSCT0000001454	ALDBSSCG0000000877	chr10	19937230	19951293	-
ALDBSSCT0000001327	ALDBSSCG0000000810	chr10	70856795	70857675	+
ALDBSSCT0000001456	ALDBSSCG0000000877	chr10	19937230	19951293	-
ALDBSSCT0000006544	ALDBSSCG0000004000	chr3	6572301	6573154	+
ALDBSSCT0000001458	ALDBSSCG0000000879	chr10	21089909	21092124	-
ALDBSSCT0000003314	ALDBSSCG0000001994	chr13	146709329	146714480	-
ALDBSSCT0000002387	ALDBSSCG0000001446	chr12	18663528	18671417	-
ENSSSCT00000020380	ENSSSCG00000018785	chr18	10922817	10923116	-
ALDBSSCT0000003312	ALDBSSCG0000001992	chr13	146007317	146014007	-
ALDBSSCT0000008800	ALDBSSCG0000005375	chr6	39693086	39696174	+
ALDBSSCT0000000929	ALDBSSCG0000000571	chr1	216464534	216467316	-
ALDBSSCT0000000928	ALDBSSCG0000000571	chr1	216464534	216467316	-
ALDBSSCT0000007504	ALDBSSCG0000004552	chr4	38963045	39069344	+
ALDBSSCT0000002654	ALDBSSCG0000001615	chr13	68135142	68138574	+
ALDBSSCT0000011244	ALDBSSCG0000006828	chr9	74084568	74089028	+
ALDBSSCT0000002554	ALDBSSCG0000001549	chr13	5024317	5148984	+
ALDBSSCT0000001885	ALDBSSCG0000001141	chr11	6809063	6819245	-
ALDBSSCT0000010199	ALDBSSCG0000006209	chr7	73152420	73196982	-
ALDBSSCT0000002225	ALDBSSCG0000001336	chr12	32823580	32826316	+
ALDBSSCT0000000584	ALDBSSCG0000000349	chr1	314141524	314143569	+
ALDBSSCT0000004447	ALDBSSCG0000002711	chr15	53516558	53584877	-
ALDBSSCT0000002312	ALDBSSCG0000001396	chr12	62923768	62926303	+
ALDBSSCT0000000580	ALDBSSCG0000000345	chr1	312944211	312952738	+
ALDBSSCT0000004443	ALDBSSCG0000002707	chr15	51587842	51588907	-
ALDBSSCT0000006128	ALDBSSCG0000003744	chr2	3109187	3158281	-
ALDBSSCT0000004760	ALDBSSCG0000002897	chr16	38491013	38492742	+
ALDBSSCT0000010106	ALDBSSCG0000006155	chr7	29345327	29348972	-
ALDBSSCT0000007019	ALDBSSCG0000004268	chr3	11422001	11425024	-
ALDBSSCT0000011858	ALDBSSCG0000007205	GL896456.1	29942	44725	-
ALDBSSCT0000009129	ALDBSSCG0000005567	chr6	143658806	143661919	+
ALDBSSCT0000004682	ALDBSSCG0000002851	chr16	4209087	4210914	+
ALDBSSCT0000010891	ALDBSSCG0000006598	chr8	74645947	74648438	-
ALDBSSCT0000001698	ALDBSSCG0000001024	chr11	14463297	14494878	+
ALDBSSCT0000010693	ALDBSSCG0000006476	chr8	145176542	145179345	+
ALDBSSCT0000011853	ALDBSSCG0000007202	GL896324.1	46204	47110	+
ALDBSSCT0000000405	ALDBSSCG0000000236	chr1	204418054	204423523	+
ALDBSSCT0000008690	ALDBSSCG0000005299	chr5	106752287	106753931	-
ALDBSSCT0000009317	ALDBSSCG0000005680	chr6	44523173	44528228	-
ALDBSSCT0000003520	ALDBSSCG0000002118	chr14	31349880	31361764	+
ALDBSSCT0000002138	ALDBSSCG0000001281	chr12	4675035	4708882	+
ALDBSSCT0000002139	ALDBSSCG0000001281	chr12	4675035	4708882	+
ENSSSCT00000035641	ENSSSCG00000030934	chrX	6807001	6811133	+
ALDBSSCT0000002425	ALDBSSCG0000001468	chr12	36849088	36851275	-
ALDBSSCT0000011315	ALDBSSCG0000006872	chr9	127640360	127641469	+
ALDBSSCT0000010287	ALDBSSCG0000006252	chr7	100586593	100606986	-
ALDBSSCT0000010286	ALDBSSCG0000006251	chr7	100281147	100286365	-
ALDBSSCT0000003958	ALDBSSCG0000002385	chr14	70773051	70773782	-
ALDBSSCT0000010672	ALDBSSCG0000006475	chr8	144715718	144727029	+
ALDBSSCT0000006869	ALDBSSCG0000004185	chr3	122754098	122755354	+
ALDBSSCT0000002034	ALDBSSCG0000001229	chr11	76561511	76611190	-
ALDBSSCT0000005708	ALDBSSCG0000003464	chr18	42159865	42170214	-
ALDBSSCT0000002031	ALDBSSCG0000001227	chr11	75243948	75246002	-
ALDBSSCT0000010668	ALDBSSCG0000006475	chr8	144715691	144727029	+
ALDBSSCT0000006477	ALDBSSCG0000003955	chr2	147110862	147111328	-
ALDBSSCT0000006862	ALDBSSCG0000004182	chr3	122108731	122109367	+
ALDBSSCT0000006863	ALDBSSCG0000004183	chr3	122442067	122518280	+
ALDBSSCT0000011633	ALDBSSCG0000007063	chr9	102937494	102941484	-
ALDBSSCT0000005338	ALDBSSCG0000003228	chr17	37473921	37482813	-
ENSSSCT00000035481	ENSSSCG00000030916	chr7	106551501	106552738	-
ALDBSSCT0000004611	ALDBSSCG0000002805	chr15	134133581	134140304	-
ALDBSSCT0000004022	ALDBSSCG0000002423	chr14	108150901	108385209	-
ALDBSSCT0000001112	ALDBSSCG0000000691	chr10	10132511	10137175	+
ALDBSSCT0000009727	ALDBSSCG0000005936	chr7	39210592	39222980	+
ALDBSSCT0000005632	ALDBSSCG0000003412	chr18	6243034	6244027	-
ALDBSSCT0000005633	ALDBSSCG0000003413	chr18	6699077	6700018	-
ALDBSSCT0000005634	ALDBSSCG0000003413	chr18	6699077	6700018	-
ALDBSSCT0000011771	ALDBSSCG0000007136	chr9	148558387	148568813	-
ALDBSSCT0000011772	ALDBSSCG0000007136	chr9	148558387	148568813	-
ALDBSSCT0000008802	ALDBSSCG0000005376	chr6	39774940	39777125	+
ALDBSSCT0000004048	ALDBSSCG0000002445	chr14	129119172	129143815	-
ALDBSSCT0000004006	ALDBSSCG0000002414	chr14	96079984	96099409	-
ALDBSSCT0000011676	ALDBSSCG0000007090	chr9	128762419	128764569	-
ALDBSSCT0000007243	ALDBSSCG0000004393	chr3	84691366	84694560	-
ALDBSSCT0000003799	ALDBSSCG0000002282	chr14	8406009	8406537	-
ALDBSSCT0000000037	ALDBSSCG0000000021	chr1	10150406	10235063	+
ALDBSSCT0000005655	ALDBSSCG0000003430	chr18	15475639	15487755	-
ALDBSSCT0000010385	ALDBSSCG0000006307	chr8	2959045	2962101	+
ALDBSSCT0000006331	ALDBSSCG0000003873	chr2	78646981	78648650	-
ALDBSSCT0000009254	ALDBSSCG0000005639	chr6	18527173	18528508	-
ALDBSSCT0000002042	ALDBSSCG0000001232	chr11	78372544	78376542	-
ALDBSSCT0000004229	ALDBSSCG0000002559	chr15	83152191	83301045	+
ALDBSSCT0000004340	ALDBSSCG0000002627	chr15	142103242	142153473	+
ALDBSSCT0000009353	ALDBSSCG0000005707	chr6	56163372	56165498	-
ALDBSSCT0000005791	ALDBSSCG0000003518	chr2	5919059	5935245	+
ALDBSSCT0000004348	ALDBSSCG0000002634	chr15	146076497	146078461	+
ALDBSSCT0000005146	ALDBSSCG0000003101	chr17	32125641	32136649	+
ALDBSSCT0000011008	ALDBSSCG0000006678	chr8	141702906	141729031	-
ALDBSSCT0000005145	ALDBSSCG0000003100	chr17	31315685	31364884	+
ALDBSSCT0000009894	ALDBSSCG0000006017	chr7	100864492	100867060	+
ALDBSSCT0000003610	ALDBSSCG0000002162	chr14	60234396	60235722	+
ALDBSSCT0000009898	ALDBSSCG0000006021	chr7	102526650	102562327	+
ALDBSSCT0000009787	ALDBSSCG0000005967	chr7	57689137	57742344	+
ALDBSSCT0000009481	ALDBSSCG0000005781	chr6	98917796	98943647	-
ALDBSSCT0000009350	ALDBSSCG0000005704	chr6	54492727	54493920	-
ALDBSSCT0000009487	ALDBSSCG0000005786	chr6	100800215	100815026	-
ALDBSSCT0000011559	ALDBSSCG0000007017	chr9	63070234	63070779	-
ALDBSSCT0000009235	ALDBSSCG0000005628	chr6	12429782	12432300	-
ALDBSSCT0000003653	ALDBSSCG0000002184	chr14	77775467	77776229	+
ALDBSSCT0000007233	ALDBSSCG0000004392	chr3	83825542	83867875	-
ALDBSSCT0000009795	ALDBSSCG0000005972	chr7	60751990	60801781	+
ALDBSSCT0000010074	ALDBSSCG0000006132	chr7	20603368	20638957	-
ALDBSSCT0000004815	ALDBSSCG0000002927	chr16	57568433	57598854	+
ALDBSSCT0000010078	ALDBSSCG0000006135	chr7	21894267	21896617	-
ALDBSSCT0000007665	ALDBSSCG0000004655	chr4	108146310	108148992	+
ALDBSSCT0000006049	ALDBSSCG0000003703	chr2	142664365	142665527	+
ENSSSCT00000034287	ENSSSCG00000001396	chr7	27626975	27627652	-
ALDBSSCT0000009799	ALDBSSCG0000005976	chr7	63840099	63852039	+
ALDBSSCT0000009334	ALDBSSCG0000005693	chr6	51341554	51347518	-
ALDBSSCT0000008822	ALDBSSCG0000005388	chr6	42424227	42509981	+
ALDBSSCT0000000320	ALDBSSCG0000000186	chr1	155395789	155403534	+
ALDBSSCT0000007495	ALDBSSCG0000004545	chr4	32901090	33026978	+
ALDBSSCT0000011482	ALDBSSCG0000006989	chr9	40835708	40837691	-
ALDBSSCT0000000326	ALDBSSCG0000000190	chr1	163117061	163154667	+
ALDBSSCT0000000247	ALDBSSCG0000000144	chr1	124942920	124944948	+
ALDBSSCT0000007564	ALDBSSCG0000004590	chr4	73904660	73905895	+
ALDBSSCT0000009147	ALDBSSCG0000005576	chr6	147804751	147834388	+
ALDBSSCT0000006127	ALDBSSCG0000003743	chr2	2747074	2749524	-
ALDBSSCT0000008573	ALDBSSCG0000005217	chr5	49727407	49772183	-
ALDBSSCT0000005565	ALDBSSCG0000003368	chr18	52119192	52119499	+
ALDBSSCT0000010363	ALDBSSCG0000006293	chr7	129834498	129835864	-
ALDBSSCT0000006646	ALDBSSCG0000004065	chr3	40058933	40063268	+
ALDBSSCT0000001142	ALDBSSCG0000000706	chr10	15951908	15966887	+
ALDBSSCT0000001143	ALDBSSCG0000000707	chr10	16862788	16869950	+
ALDBSSCT0000001140	ALDBSSCG0000000704	chr10	14879713	14880881	+
ALDBSSCT0000005568	ALDBSSCG0000003370	chr18	53406194	53422408	+
ALDBSSCT0000001144	ALDBSSCG0000000708	chr10	19673321	19675520	+
ALDBSSCT0000006043	ALDBSSCG0000003699	chr2	140258327	140267757	+
ALDBSSCT0000001964	ALDBSSCG0000001183	chr11	24585228	24588543	-
ALDBSSCT0000001906	ALDBSSCG0000001153	chr11	12763668	12765380	-
ALDBSSCT0000000869	ALDBSSCG0000000526	chr1	163824056	163829013	-
ALDBSSCT0000001627	ALDBSSCG0000000986	chr10	76934566	76936080	-
ALDBSSCT0000003109	ALDBSSCG0000001866	chr13	36885595	36887973	-
ALDBSSCT0000001868	ALDBSSCG0000001131	chr11	4112459	4192013	-
ALDBSSCT0000003250	ALDBSSCG0000001959	chr13	120032423	120034875	-
ALDBSSCT0000001628	ALDBSSCG0000000987	chr10	77611515	77624358	-
ALDBSSCT0000001969	ALDBSSCG0000001187	chr11	25665578	25667673	-
ALDBSSCT0000003102	ALDBSSCG0000001863	chr13	32827623	32829206	-
ALDBSSCT0000006491	ALDBSSCG0000003963	chr2	148059852	148066939	-
ENSSSCT00000021277	ENSSSCG00000019682	chr14	115787973	115788244	-
ALDBSSCT0000006115	ALDBSSCG0000003737	chr2	1537916	1539497	-
ALDBSSCT0000006110	ALDBSSCG0000003733	chr2	631622	632610	-
ALDBSSCT0000007986	ALDBSSCG0000004842	chr4	77200618	77206897	-
ALDBSSCT0000010656	ALDBSSCG0000006466	chr8	139881345	139884558	+
ALDBSSCT0000006478	ALDBSSCG0000003956	chr2	147192945	147195168	-
ALDBSSCT0000006057	ALDBSSCG0000003710	chr2	147016292	147018606	+
ALDBSSCT0000003033	ALDBSSCG0000001814	chr13	215019287	215020554	+
ALDBSSCT0000003034	ALDBSSCG0000001815	chr13	215484935	215486122	+
ALDBSSCT0000009620	ALDBSSCG0000005869	chr7	4525577	4590732	+
ALDBSSCT0000006042	ALDBSSCG0000003698	chr2	140104659	140113518	+
ALDBSSCT0000010972	ALDBSSCG0000006655	chr8	122432857	122435680	-
ENSSSCT00000035465	ENSSSCG00000006687	chr4	109065647	109070602	+
ALDBSSCT0000010864	ALDBSSCG0000006581	chr8	58014703	58019820	-
ALDBSSCT0000009226	ALDBSSCG0000005621	chr6	10648038	10668132	-
ENSSSCT00000017310	ENSSSCG00000015897	chr15	76423089	76477401	-
ALDBSSCT0000008272	ALDBSSCG0000005020	chr5	15824342	15854639	+
ALDBSSCT0000006765	ALDBSSCG0000004132	chr3	80337100	80339281	+
ALDBSSCT0000008379	ALDBSSCG0000005091	chr5	78998331	79090876	+
ALDBSSCT0000007056	ALDBSSCG0000004290	chr3	22227017	22232732	-
ALDBSSCT0000002829	ALDBSSCG0000001723	chr13	142784611	142787041	+
ALDBSSCT0000011934	ALDBSSCG0000007263	chrX	55266278	55275391	+
ALDBSSCT0000001711	ALDBSSCG0000001032	chr11	18208881	18210956	+
ALDBSSCT0000007198	ALDBSSCG0000004376	chr3	75704293	75711133	-
ALDBSSCT0000009680	ALDBSSCG0000005906	chr7	22289224	22289674	+
ALDBSSCT0000002821	ALDBSSCG0000001715	chr13	134685471	134702667	+
ALDBSSCT0000002949	ALDBSSCG0000001774	chr13	191551193	191557483	+
ALDBSSCT0000003622	ALDBSSCG0000002172	chr14	65774083	65781203	+
ALDBSSCT0000001490	ALDBSSCG0000000904	chr10	35977602	35979318	-
ALDBSSCT0000003196	ALDBSSCG0000001926	chr13	79212399	79213825	-
ALDBSSCT0000011872	ALDBSSCG0000007218	JH118724.1	89268	94343	+
ALDBSSCT0000001718	ALDBSSCG0000001036	chr11	19432914	19436632	+
ALDBSSCT0000005336	ALDBSSCG0000003228	chr17	37473921	37482471	-
ALDBSSCT0000008293	ALDBSSCG0000005036	chr5	26710368	26807270	+
ALDBSSCT0000011191	ALDBSSCG0000006794	chr9	54438693	54444099	+
ALDBSSCT0000003741	ALDBSSCG0000002240	chr14	123490029	123491347	+
ALDBSSCT0000002617	ALDBSSCG0000001590	chr13	35291645	35297014	+
ALDBSSCT0000011876	ALDBSSCG0000007222	JH118887.1	22099	22726	+
ALDBSSCT0000002613	ALDBSSCG0000001588	chr13	34299949	34344157	+
ALDBSSCT0000010483	ALDBSSCG0000006362	chr8	58176086	58181933	+
ALDBSSCT0000002346	ALDBSSCG0000001420	chr12	5466920	5467490	-
ALDBSSCT0000008100	ALDBSSCG0000004915	chr4	113095857	113096844	-
ALDBSSCT0000005939	ALDBSSCG0000003629	chr2	81298320	81299971	+
ALDBSSCT0000005938	ALDBSSCG0000003628	chr2	80072715	80074384	+
ALDBSSCT0000008751	ALDBSSCG0000005342	chr6	16878686	16954522	+
ALDBSSCT0000005933	ALDBSSCG0000003624	chr2	77839217	77840164	+
ALDBSSCT0000005932	ALDBSSCG0000003623	chr2	77764461	77776005	+
ALDBSSCT0000000532	ALDBSSCG0000000314	chr1	292997929	292999509	+
ALDBSSCT0000005935	ALDBSSCG0000003625	chr2	78292573	78293517	+
ALDBSSCT0000011645	ALDBSSCG0000007070	chr9	112714527	112741185	-
ALDBSSCT0000007691	ALDBSSCG0000004670	chr4	119230742	119231465	+
ALDBSSCT0000000533	ALDBSSCG0000000315	chr1	293274258	293285840	+
ALDBSSCT0000007694	ALDBSSCG0000004673	chr4	121331042	121332345	+
ALDBSSCT0000004015	ALDBSSCG0000002419	chr14	104866223	104889684	-
ALDBSSCT0000007696	ALDBSSCG0000004674	chr4	121465810	121472608	+
ENSSSCT00000036555	ENSSSCG00000004334	chr1	65478905	65542577	-
ALDBSSCT0000010798	ALDBSSCG0000006532	chr8	20838193	20847553	-
ALDBSSCT0000008839	ALDBSSCG0000005400	chr6	46615906	46619200	+
ALDBSSCT0000004506	ALDBSSCG0000002742	chr15	77756952	77811376	-
ALDBSSCT0000010520	ALDBSSCG0000006381	chr8	77564461	77573255	+
ALDBSSCT0000008195	ALDBSSCG0000004977	chr4	139669160	139676556	-
ALDBSSCT0000007283	ALDBSSCG0000004415	chr3	103341891	103344994	-
ENSSSCT00000006551	ENSSSCG00000005968	chr4	14948785	14973488	-
ALDBSSCT0000010521	ALDBSSCG0000006381	chr8	77564754	77573255	+
ALDBSSCT0000003360	ALDBSSCG0000002020	chr13	170385985	170412296	-
ALDBSSCT0000009211	ALDBSSCG0000005612	chr6	7393234	7394317	-
ALDBSSCT0000003445	ALDBSSCG0000002076	chr14	1033422	1035310	+
ALDBSSCT0000010526	ALDBSSCG0000006386	chr8	81084317	81088640	+
ALDBSSCT0000000561	ALDBSSCG0000000332	chr1	306016624	306017621	+
ALDBSSCT0000000560	ALDBSSCG0000000331	chr1	304146272	304173254	+
ALDBSSCT0000003441	ALDBSSCG0000002074	chr14	417607	505298	+
ALDBSSCT0000002817	ALDBSSCG0000001713	chr13	134137133	134141069	+
ALDBSSCT0000009351	ALDBSSCG0000005705	chr6	54671990	54677914	-
ALDBSSCT0000004845	ALDBSSCG0000002941	chr16	70057573	70059628	+
ALDBSSCT0000002468	ALDBSSCG0000001493	chr12	46119846	46120630	-
ALDBSSCT0000000910	ALDBSSCG0000000556	chr1	204871942	204878724	-
ALDBSSCT0000000911	ALDBSSCG0000000557	chr1	205104993	205124296	-
ALDBSSCT0000000444	ALDBSSCG0000000267	chr1	238398022	238507678	+
ALDBSSCT0000000917	ALDBSSCG0000000563	chr1	209639645	209641230	-
ALDBSSCT0000000914	ALDBSSCG0000000560	chr1	206904042	206908648	-
ALDBSSCT0000011472	ALDBSSCG0000006981	chr9	30909860	30917948	-
ALDBSSCT0000002460	ALDBSSCG0000001489	chr12	45147537	45152031	-
ALDBSSCT0000000449	ALDBSSCG0000000271	chr1	245181817	245237825	+
ALDBSSCT0000002509	ALDBSSCG0000001517	chr12	56981419	56982144	-
ALDBSSCT0000010257	ALDBSSCG0000006236	chr7	94153846	94179734	-
ALDBSSCT0000012038	ALDBSSCG0000007338	chrX	67420339	67422193	-
ALDBSSCT0000000967	ALDBSSCG0000000594	chr1	245115120	245127223	-
ALDBSSCT0000002267	ALDBSSCG0000001368	chr12	49290543	49296787	+
ALDBSSCT0000000965	ALDBSSCG0000000592	chr1	242836553	242837711	-
ALDBSSCT0000004658	ALDBSSCG0000002837	chr15	154469269	154471155	-
ALDBSSCT0000002260	ALDBSSCG0000001362	chr12	44825362	44836358	+
ALDBSSCT0000011739	ALDBSSCG0000007123	chr9	143642568	143643832	-
ALDBSSCT0000011702	ALDBSSCG0000007106	chr9	134651174	134669821	-
ALDBSSCT0000010251	ALDBSSCG0000006234	chr7	92003906	92018644	-
ALDBSSCT0000002185	ALDBSSCG0000001307	chr12	15181791	15193740	+
ALDBSSCT0000008564	ALDBSSCG0000005210	chr5	43570659	43572781	-
ALDBSSCT0000002183	ALDBSSCG0000001305	chr12	14864324	14869427	+
ALDBSSCT0000009247	ALDBSSCG0000005632	chr6	15056160	15057194	-
ALDBSSCT0000005875	ALDBSSCG0000003577	chr2	44958266	44959346	+
ALDBSSCT0000007180	ALDBSSCG0000004364	chr3	60771615	60792203	-
ALDBSSCT0000011033	ALDBSSCG0000006695	chr9	65460	66764	+
ALDBSSCT0000004168	ALDBSSCG0000002519	chr15	38558566	38560238	+
ALDBSSCT0000011475	ALDBSSCG0000006983	chr9	32373825	32375617	-
ALDBSSCT0000010162	ALDBSSCG0000006186	chr7	49984327	49992549	-
ALDBSSCT0000004236	ALDBSSCG0000002566	chr15	88691764	88692359	+
ALDBSSCT0000010444	ALDBSSCG0000006345	chr8	33696878	33748574	+
ALDBSSCT0000004161	ALDBSSCG0000002512	chr15	34978574	34981686	+
ALDBSSCT0000004160	ALDBSSCG0000002511	chr15	34935634	34937734	+
ALDBSSCT0000012039	ALDBSSCG0000007339	chrX	67444265	67445925	-
ALDBSSCT0000001258	ALDBSSCG0000000763	chr10	51940698	51944511	+
ALDBSSCT0000001404	ALDBSSCG0000000854	chr10	13117133	13422754	-
ALDBSSCT0000008767	ALDBSSCG0000005352	chr6	26755882	26758968	+
ALDBSSCT0000003631	ALDBSSCG0000002177	chr14	71614503	71667259	+
ALDBSSCT0000005349	ALDBSSCG0000003236	chr17	42398249	42405006	-
ENSSSCT00000034080	ENSSSCG00000004600	chr1	126926288	126983332	-
ALDBSSCT0000011054	ALDBSSCG0000006710	chr9	6145060	6145925	+
ALDBSSCT0000002169	ALDBSSCG0000001297	chr12	12472749	12482099	+
ALDBSSCT0000005345	ALDBSSCG0000003234	chr17	39606114	39608973	-
ALDBSSCT0000005346	ALDBSSCG0000003235	chr17	40670400	40692432	-
ALDBSSCT0000002005	ALDBSSCG0000001208	chr11	56948526	56949898	-
ALDBSSCT0000007313	ALDBSSCG0000004439	chr3	117931808	117932821	-
ALDBSSCT0000005691	ALDBSSCG0000003455	chr18	35901487	35903589	-
ALDBSSCT0000008849	ALDBSSCG0000005406	chr6	48452344	48455032	+
ALDBSSCT0000007183	ALDBSSCG0000004367	chr3	62748411	62749385	-
ALDBSSCT0000005061	ALDBSSCG0000003051	chr16	77470201	77475286	-
ALDBSSCT0000002762	ALDBSSCG0000001675	chr13	112903645	113037242	+
ALDBSSCT0000002761	ALDBSSCG0000001674	chr13	111049443	111051195	+
ALDBSSCT0000010952	ALDBSSCG0000006638	chr8	109091962	109094082	-
ALDBSSCT0000009132	ALDBSSCG0000005569	chr6	143830052	143833790	+
ALDBSSCT0000008153	ALDBSSCG0000004949	chr4	129236993	129237473	-
ALDBSSCT0000009851	ALDBSSCG0000005995	chr7	83582110	83590777	+
ALDBSSCT0000007171	ALDBSSCG0000004358	chr3	54764201	54821564	-
ALDBSSCT0000011237	ALDBSSCG0000006822	chr9	70867594	70868740	+
ALDBSSCT0000012042	ALDBSSCG0000007341	chrX	69685355	69687763	-
ALDBSSCT0000003732	ALDBSSCG0000002234	chr14	118574536	118578562	+
ALDBSSCT0000007276	ALDBSSCG0000004410	chr3	100972901	100973519	-
ALDBSSCT0000007178	ALDBSSCG0000004363	chr3	59512427	59513326	-
ALDBSSCT0000005744	ALDBSSCG0000003483	chr18	52032613	52035509	-
ALDBSSCT0000007881	ALDBSSCG0000004771	chr4	12518571	12732529	-
ALDBSSCT0000003699	ALDBSSCG0000002211	chr14	100634575	100638121	+
ALDBSSCT0000003843	ALDBSSCG0000002310	chr14	30747065	30748457	-
ALDBSSCT0000007409	ALDBSSCG0000004489	chr4	998208	1005683	+
ALDBSSCT0000000916	ALDBSSCG0000000562	chr1	208285764	208288239	-
ALDBSSCT0000007404	ALDBSSCG0000004487	chr4	187092	193797	+
ALDBSSCT0000000367	ALDBSSCG0000000221	chr1	185417372	185419525	+
ALDBSSCT0000000366	ALDBSSCG0000000220	chr1	185125064	185153008	+
ALDBSSCT0000003416	ALDBSSCG0000002055	chr13	210988725	210991362	-
ALDBSSCT0000007403	ALDBSSCG0000004487	chr4	187015	193797	+
ALDBSSCT0000008287	ALDBSSCG0000005032	chr5	22948750	22950461	+
ALDBSSCT0000004578	ALDBSSCG0000002782	chr15	116425426	116435610	-
ALDBSSCT0000011958	ALDBSSCG0000007278	chrX	103841191	103844939	+
ALDBSSCT0000005881	ALDBSSCG0000003583	chr2	48909275	48929108	+
ALDBSSCT0000007299	ALDBSSCG0000004429	chr3	110494418	110499120	-
ALDBSSCT0000005887	ALDBSSCG0000003589	chr2	52091920	52094870	+
ALDBSSCT0000005886	ALDBSSCG0000003588	chr2	51984530	52003458	+
ENSSSCT00000005081	ENSSSCG00000004600	chr1	126842175	127433537	-
ALDBSSCT0000005113	ALDBSSCG0000003078	chr17	5695148	5697114	+
ALDBSSCT0000011314	ALDBSSCG0000006871	chr9	126399227	126400561	+
ALDBSSCT0000007880	ALDBSSCG0000004771	chr4	12468887	12732532	-
ALDBSSCT0000005446	ALDBSSCG0000003297	chr18	6888013	6893562	+
ALDBSSCT0000005116	ALDBSSCG0000003081	chr17	7053224	7055212	+
ALDBSSCT0000008530	ALDBSSCG0000005190	chr5	23100501	23102266	-
ALDBSSCT0000007037	ALDBSSCG0000004283	chr3	18045080	18049993	-
ALDBSSCT0000005525	ALDBSSCG0000003350	chr18	42733895	42751353	+
ALDBSSCT0000011462	ALDBSSCG0000006974	chr9	21859589	21861895	-
ALDBSSCT0000008252	ALDBSSCG0000005007	chr5	6039841	6041673	+
ALDBSSCT0000011947	ALDBSSCG0000007270	chrX	74351505	74353549	+
ALDBSSCT0000005282	ALDBSSCG0000003192	chr17	12054874	12059890	-
ALDBSSCT0000003739	ALDBSSCG0000002238	chr14	121740298	121742697	+
ALDBSSCT0000004904	ALDBSSCG0000002972	chr16	21402013	21402736	-
ALDBSSCT0000008532	ALDBSSCG0000005192	chr5	23652207	23657322	-
ALDBSSCT0000007307	ALDBSSCG0000004435	chr3	117294000	117297829	-
ALDBSSCT0000004903	ALDBSSCG0000002971	chr16	19324256	19326266	-
ALDBSSCT0000009524	ALDBSSCG0000005803	chr6	126251093	126260730	-
ALDBSSCT0000006252	ALDBSSCG0000003818	chr2	38254775	38256372	-
ALDBSSCT0000007308	ALDBSSCG0000004435	chr3	117294000	117298170	-
ALDBSSCT0000009919	ALDBSSCG0000006039	chr7	110021314	110021777	+
ALDBSSCT0000004908	ALDBSSCG0000002974	chr16	25729029	25732546	-
ALDBSSCT0000008837	ALDBSSCG0000005399	chr6	46563183	46604364	+
ALDBSSCT0000002605	ALDBSSCG0000001584	chr13	28517576	28518856	+
ALDBSSCT0000002482	ALDBSSCG0000001501	chr12	52123887	52125550	-
ALDBSSCT0000002483	ALDBSSCG0000001502	chr12	52708852	52722946	-
ALDBSSCT0000006152	ALDBSSCG0000003760	chr2	5934247	5945085	-
ALDBSSCT0000001996	ALDBSSCG0000001205	chr11	56092171	56096454	-
ALDBSSCT0000007535	ALDBSSCG0000004572	chr4	51312435	51322933	+
ALDBSSCT0000006155	ALDBSSCG0000003761	chr2	6306508	6310307	-
ENSSSCT00000035782	ENSSSCG00000031041	chr4	7685582	7703448	+
ALDBSSCT0000011832	ALDBSSCG0000007184	GL894621.1	35271	37796	-
ALDBSSCT0000002488	ALDBSSCG0000001506	chr12	54029279	54030201	-
ALDBSSCT0000010491	ALDBSSCG0000006366	chr8	58643579	58644377	+
ALDBSSCT0000001999	ALDBSSCG0000001206	chr11	56663003	56667711	-
ALDBSSCT0000004377	ALDBSSCG0000002657	chr15	157445358	157447780	+
ALDBSSCT0000008403	ALDBSSCG0000005104	chr5	86209540	86234219	+
ALDBSSCT0000004304	ALDBSSCG0000002604	chr15	120923891	120930412	+
ALDBSSCT0000004881	ALDBSSCG0000002961	chr16	86667746	86674285	+
ALDBSSCT0000003098	ALDBSSCG0000001859	chr13	31043268	31047279	-
ALDBSSCT0000003099	ALDBSSCG0000001860	chr13	31135058	31135601	-
ALDBSSCT0000011994	ALDBSSCG0000007303	chrX	2149013	2282568	-
ALDBSSCT0000007363	ALDBSSCG0000004469	chr3	135815145	135825763	-
ALDBSSCT0000011996	ALDBSSCG0000007305	chrX	3591681	3965556	-
ALDBSSCT0000005238	ALDBSSCG0000003161	chr17	61853620	61878541	+
ALDBSSCT0000009323	ALDBSSCG0000005685	chr6	46525874	46534549	-
ALDBSSCT0000008392	ALDBSSCG0000005102	chr5	83903813	83905841	+
ALDBSSCT0000011854	ALDBSSCG0000007203	GL896343.1	27897	32823	-
ALDBSSCT0000011964	ALDBSSCG0000007281	chrX	105952554	105963465	+
ENSSSCT00000035929	ENSSSCG00000001727	chr7	48679157	48748680	-
ALDBSSCT0000008940	ALDBSSCG0000005470	chr6	76018320	76025834	+
ALDBSSCT0000001296	ALDBSSCG0000000788	chr10	61802262	61849008	+
ALDBSSCT0000001297	ALDBSSCG0000000788	chr10	61844376	62002178	+
ALDBSSCT0000000824	ALDBSSCG0000000498	chr1	146042400	146047730	-
ALDBSSCT0000008083	ALDBSSCG0000004905	chr4	108784575	108785508	-
ALDBSSCT0000008084	ALDBSSCG0000004906	chr4	109365513	109366713	-
ALDBSSCT0000000823	ALDBSSCG0000000497	chr1	145834686	145840046	-
ALDBSSCT0000009144	ALDBSSCG0000005573	chr6	146521008	146524413	+
ALDBSSCT0000004289	ALDBSSCG0000002598	chr15	117382781	117384523	+
ALDBSSCT0000008088	ALDBSSCG0000004909	chr4	110270405	110272230	-
ALDBSSCT0000011298	ALDBSSCG0000006861	chr9	115582814	115602155	+
ALDBSSCT0000003143	ALDBSSCG0000001889	chr13	55516510	55518168	-
ENSSSCT00000035877	ENSSSCG00000026924	chr4	417262	422897	-
ALDBSSCT0000010291	ALDBSSCG0000006255	chr7	104302681	104306673	-
ALDBSSCT0000004281	ALDBSSCG0000002593	chr15	115151324	115236157	+
ALDBSSCT0000008244	ALDBSSCG0000005005	chr5	3632849	3642673	+
ALDBSSCT0000008245	ALDBSSCG0000005005	chr5	3632849	3642673	+
ALDBSSCT0000001198	ALDBSSCG0000000737	chr10	33515980	33543030	+
ALDBSSCT0000006754	ALDBSSCG0000004125	chr3	75816622	75883119	+
ALDBSSCT0000008717	ALDBSSCG0000005318	chr6	4247519	4255438	+
ALDBSSCT0000008719	ALDBSSCG0000005318	chr6	4247519	4255438	+
ALDBSSCT0000001190	ALDBSSCG0000000734	chr10	32180953	32183417	+
ALDBSSCT0000010920	ALDBSSCG0000006622	chr8	93076195	93090916	-
ALDBSSCT0000006536	ALDBSSCG0000003996	chr3	5383663	5410016	+
ALDBSSCT0000002870	ALDBSSCG0000001743	chr13	159025261	159139311	+
ALDBSSCT0000001334	ALDBSSCG0000000813	chr10	71390161	71392350	+
ALDBSSCT0000001440	ALDBSSCG0000000871	chr10	17585732	17614694	-
ALDBSSCT0000001339	ALDBSSCG0000000818	chr10	72939079	72944311	+
ALDBSSCT0000003242	ALDBSSCG0000001953	chr13	108847807	108853885	-
ALDBSSCT0000011986	ALDBSSCG0000007296	chrX	139227603	139229821	+
ALDBSSCT0000011287	ALDBSSCG0000006854	chr9	102529749	102535957	+
ALDBSSCT0000007999	ALDBSSCG0000004852	chr4	81625846	81656141	-
ALDBSSCT0000002238	ALDBSSCG0000001345	chr12	37345715	37350558	+
ALDBSSCT0000010169	ALDBSSCG0000006192	chr7	57684420	57689049	-
ALDBSSCT0000002623	ALDBSSCG0000001595	chr13	36881156	36886431	+
ALDBSSCT0000002620	ALDBSSCG0000001593	chr13	35883429	35885697	+
ALDBSSCT0000008810	ALDBSSCG0000005381	chr6	40640494	40642074	+
ALDBSSCT0000000484	ALDBSSCG0000000289	chr1	266683882	266688785	+
ALDBSSCT0000000485	ALDBSSCG0000000289	chr1	266683922	266696524	+
ALDBSSCT0000000486	ALDBSSCG0000000289	chr1	266685962	266696524	+
ALDBSSCT0000011825	ALDBSSCG0000007180	GL894574.1	67406	73081	+
ALDBSSCT0000000482	ALDBSSCG0000000287	chr1	264741509	264753018	+
ALDBSSCT0000000483	ALDBSSCG0000000288	chr1	266151744	266160151	+
ALDBSSCT0000011877	ALDBSSCG0000007223	JH118887.1	32374	33103	+
ALDBSSCT0000003931	ALDBSSCG0000002366	chr14	60583022	60603461	-
ALDBSSCT0000004590	ALDBSSCG0000002792	chr15	122882410	122883897	-
ALDBSSCT0000008902	ALDBSSCG0000005441	chr6	58482358	58486214	+
ENSSSCT00000033794	ENSSSCG00000003617	chr6	82743317	82746046	+
ALDBSSCT0000004452	ALDBSSCG0000002714	chr15	55033932	55038303	-
ALDBSSCT0000004451	ALDBSSCG0000002714	chr15	55033932	55036828	-
ALDBSSCT0000003919	ALDBSSCG0000002357	chr14	55071955	55076649	-
ALDBSSCT0000002309	ALDBSSCG0000001393	chr12	62300759	62307945	+
ALDBSSCT0000008165	ALDBSSCG0000004958	chr4	134027537	134049160	-
ALDBSSCT0000011173	ALDBSSCG0000006783	chr9	51592748	51594606	+
ALDBSSCT0000001685	ALDBSSCG0000001018	chr11	8770513	8772099	+
ALDBSSCT0000001727	ALDBSSCG0000001044	chr11	22320033	22321646	+
ALDBSSCT0000007002	ALDBSSCG0000004255	chr3	6629750	6639048	-
ENSSSCT00000031317	ENSSSCG00000020977	chrX	74389847	74404857	-
ALDBSSCT0000007004	ALDBSSCG0000004257	chr3	7833571	7836983	-
ALDBSSCT0000001721	ALDBSSCG0000001039	chr11	19591308	19596470	+
ALDBSSCT0000002284	ALDBSSCG0000001378	chr12	55458790	55465075	+
ALDBSSCT0000000553	ALDBSSCG0000000328	chr1	303591823	303602681	+
ALDBSSCT0000006321	ALDBSSCG0000003864	chr2	70615642	70617401	-
ALDBSSCT0000002539	ALDBSSCG0000001537	chr12	62737412	62747740	-
ALDBSSCT0000009362	ALDBSSCG0000005713	chr6	57252939	57264726	-
ALDBSSCT0000009363	ALDBSSCG0000005713	chr6	57252939	57264728	-
ALDBSSCT0000000554	ALDBSSCG0000000328	chr1	303591867	303626212	+
ENSSSCT00000016750	ENSSSCG00000015375	chr9	98589971	98766514	+
ALDBSSCT0000008868	ALDBSSCG0000005418	chr6	51947964	51953151	+
ALDBSSCT0000000559	ALDBSSCG0000000330	chr1	303870314	303870977	+
ALDBSSCT0000009081	ALDBSSCG0000005541	chr6	125811821	125857266	+
ALDBSSCT0000007725	ALDBSSCG0000004690	chr4	134297178	134338457	+
ALDBSSCT0000010845	ALDBSSCG0000006570	chr8	50102416	50107104	-
ALDBSSCT0000011965	ALDBSSCG0000007282	chrX	113105761	113109306	+
ALDBSSCT0000005658	ALDBSSCG0000003433	chr18	18770433	18776091	-
ALDBSSCT0000002430	ALDBSSCG0000001471	chr12	38344990	38356842	-
ALDBSSCT0000010840	ALDBSSCG0000006566	chr8	44382396	44454455	-
ALDBSSCT0000002435	ALDBSSCG0000001474	chr12	39643197	39654759	-
ALDBSSCT0000002434	ALDBSSCG0000001474	chr12	39643197	39654658	-
ALDBSSCT0000010669	ALDBSSCG0000006475	chr8	144715691	144727029	+
ALDBSSCT0000007879	ALDBSSCG0000004771	chr4	12468887	12615670	-
ALDBSSCT0000010704	ALDBSSCG0000006483	chr8	146970279	147020297	+
ALDBSSCT0000011936	ALDBSSCG0000007263	chrX	55269494	55275391	+
ALDBSSCT0000005656	ALDBSSCG0000003431	chr18	15795940	15798343	-
ALDBSSCT0000005657	ALDBSSCG0000003432	chr18	17006144	17016630	-
ALDBSSCT0000010700	ALDBSSCG0000006479	chr8	145845634	145846608	+
ALDBSSCT0000004117	ALDBSSCG0000002479	chr14	151129749	151166395	-
ALDBSSCT0000010369	ALDBSSCG0000006298	chr7	131387859	131389321	-
ALDBSSCT0000011083	ALDBSSCG0000006725	chr9	10956025	10964155	+
ALDBSSCT0000009564	ALDBSSCG0000005834	chr6	148737498	148743720	-
ALDBSSCT0000005664	ALDBSSCG0000003437	chr18	21014027	21015932	-
ALDBSSCT0000007131	ALDBSSCG0000004337	chr3	44891244	44901385	-
ALDBSSCT0000007133	ALDBSSCG0000004337	chr3	44891244	44910629	-
ALDBSSCT0000007132	ALDBSSCG0000004337	chr3	44891244	44910629	-
ALDBSSCT0000011648	ALDBSSCG0000007072	chr9	112839685	112868672	-
ALDBSSCT0000001433	ALDBSSCG0000000868	chr10	16037674	16054288	-
ALDBSSCT0000006448	ALDBSSCG0000003935	chr2	139000762	139021650	-
ALDBSSCT0000001431	ALDBSSCG0000000866	chr10	15817725	15820587	-
ALDBSSCT0000011605	ALDBSSCG0000007047	chr9	89948349	89951366	-
ALDBSSCT0000011769	ALDBSSCG0000007136	chr9	148558387	148568281	-
ALDBSSCT0000001439	ALDBSSCG0000000871	chr10	17585732	17609846	-
ALDBSSCT0000001537	ALDBSSCG0000000937	chr10	57241009	57258137	-
ALDBSSCT0000001536	ALDBSSCG0000000936	chr10	57157179	57175699	-
ALDBSSCT0000001535	ALDBSSCG0000000936	chr10	57153424	57166378	-
ALDBSSCT0000001235	ALDBSSCG0000000751	chr10	44063583	44076628	+
ALDBSSCT0000004488	ALDBSSCG0000002734	chr15	70682527	70689189	-
ALDBSSCT0000004335	ALDBSSCG0000002624	chr15	139179859	139181574	+
ALDBSSCT0000005333	ALDBSSCG0000003227	chr17	35116648	35126297	-
ALDBSSCT0000002758	ALDBSSCG0000001673	chr13	109189179	109210001	+
ALDBSSCT0000005473	ALDBSSCG0000003318	chr18	18854095	18972634	+
ALDBSSCT0000002757	ALDBSSCG0000001672	chr13	107046764	107049932	+
ENSSSCT00000035761	ENSSSCG00000007280	chr17	43036066	43053973	+
ENSSSCT00000035001	ENSSSCG00000001727	chr7	48720692	48748761	-
ALDBSSCT0000005012	ALDBSSCG0000003025	chr16	58016132	58036798	-
ALDBSSCT0000008221	ALDBSSCG0000004990	chr4	143377360	143383392	-
ALDBSSCT0000006659	ALDBSSCG0000004072	chr3	40600707	40602602	+
ALDBSSCT0000011925	ALDBSSCG0000007258	chrX	47051661	47052166	+
ALDBSSCT0000005151	ALDBSSCG0000003106	chr17	36275202	36282755	+
ALDBSSCT0000011821	ALDBSSCG0000007177	GL893911.1	15262	23800	+
ALDBSSCT0000005153	ALDBSSCG0000003108	chr17	36964088	36974780	+
ALDBSSCT0000010015	ALDBSSCG0000006090	chr7	3111076	3113749	-
ALDBSSCT0000011011	ALDBSSCG0000006681	chr8	144196432	144200622	-
ALDBSSCT0000006653	ALDBSSCG0000004070	chr3	40519308	40520866	+
ALDBSSCT0000010151	ALDBSSCG0000006180	chr7	43071152	43111191	-
ALDBSSCT0000012080	ALDBSSCG0000007367	chrX	126642324	126649740	-
ALDBSSCT0000006652	ALDBSSCG0000004069	chr3	40497554	40500112	+
ALDBSSCT0000007221	ALDBSSCG0000004390	chr3	82405885	82491751	-
ALDBSSCT0000003558	ALDBSSCG0000002132	chr14	42363094	42365412	+
ALDBSSCT0000011860	ALDBSSCG0000007207	JH118414.1	96438	99193	-
ALDBSSCT0000010502	ALDBSSCG0000006373	chr8	67647925	67893964	+
ALDBSSCT0000005490	ALDBSSCG0000003328	chr18	25494988	25497863	+
ALDBSSCT0000003850	ALDBSSCG0000002313	chr14	33669152	33681096	-
ALDBSSCT0000009328	ALDBSSCG0000005688	chr6	47019232	47023895	-
ALDBSSCT0000006658	ALDBSSCG0000004072	chr3	40597763	40602602	+
ALDBSSCT0000001898	ALDBSSCG0000001148	chr11	9634286	9635495	-
ALDBSSCT0000007679	ALDBSSCG0000004663	chr4	114848283	114873296	+
ALDBSSCT0000010197	ALDBSSCG0000006208	chr7	69427059	69443629	-
ALDBSSCT0000007471	ALDBSSCG0000004527	chr4	16844942	16852536	+
ALDBSSCT0000007472	ALDBSSCG0000004528	chr4	17112651	17113877	+
ALDBSSCT0000009560	ALDBSSCG0000005831	chr6	147838287	147839694	-
ALDBSSCT0000009561	ALDBSSCG0000005831	chr6	147838287	147839694	-
ALDBSSCT0000006190	ALDBSSCG0000003784	chr2	17593047	17599172	-
ALDBSSCT0000012067	ALDBSSCG0000007357	chrX	113371650	113372259	-
ENSSSCT00000013243	ENSSSCG00000012108	chrX	7165907	7328033	+
ALDBSSCT0000001090	ALDBSSCG0000000674	chr1	313091424	313093557	-
ALDBSSCT0000001091	ALDBSSCG0000000675	chr1	313791077	313792321	-
ALDBSSCT0000001092	ALDBSSCG0000000676	chr1	313901306	313904435	-
ALDBSSCT0000004527	ALDBSSCG0000002755	chr15	91443326	91446756	-
ALDBSSCT0000003968	ALDBSSCG0000002390	chr14	71960121	71964828	-
ALDBSSCT0000005474	ALDBSSCG0000003318	chr18	18854095	19023635	+
ALDBSSCT0000005639	ALDBSSCG0000003418	chr18	8696569	8697092	-
ALDBSSCT0000004482	ALDBSSCG0000002732	chr15	66570281	66594592	-
ALDBSSCT0000004483	ALDBSSCG0000002732	chr15	66571390	66595167	-
ALDBSSCT0000001157	ALDBSSCG0000000716	chr10	22597135	22603060	+
ALDBSSCT0000006348	ALDBSSCG0000003883	chr2	84651321	84655149	-
ALDBSSCT0000003347	ALDBSSCG0000002013	chr13	160470294	160477475	-
ALDBSSCT0000001873	ALDBSSCG0000001134	chr11	5163849	5173214	-
ALDBSSCT0000009377	ALDBSSCG0000005718	chr6	58288394	58290134	-
ALDBSSCT0000005274	ALDBSSCG0000003184	chr17	6259655	6268542	-
ALDBSSCT0000001877	ALDBSSCG0000001136	chr11	5621013	5622812	-
ALDBSSCT0000001874	ALDBSSCG0000001134	chr11	5168964	5173221	-
ALDBSSCT0000005277	ALDBSSCG0000003187	chr17	9707735	9710600	-
ALDBSSCT0000003500	ALDBSSCG0000002106	chr14	23522992	23548561	+
ENSSSCT00000027578	ENSSSCG00000026924	chr4	415603	422886	-
ALDBSSCT0000001879	ALDBSSCG0000001137	chr11	5762208	5770778	-
ENSSSCT00000035807	ENSSSCG00000031038	chrX	101815818	101816384	+
ENSSSCT00000004790	ENSSSCG00000004334	chr1	65479754	65542430	-
ALDBSSCT0000001791	ALDBSSCG0000001082	chr11	73458738	73461151	+
ALDBSSCT0000006137	ALDBSSCG0000003750	chr2	3572709	3575293	-
ALDBSSCT0000011420	ALDBSSCG0000006944	chr9	7464836	7479738	-
ALDBSSCT0000005270	ALDBSSCG0000003181	chr17	3627925	3646445	-
ALDBSSCT0000011425	ALDBSSCG0000006949	chr9	8044110	8062420	-
ALDBSSCT0000005271	ALDBSSCG0000003181	chr17	3627925	3647263	-
ALDBSSCT0000008044	ALDBSSCG0000004882	chr4	95670868	95689579	-
ALDBSSCT0000008045	ALDBSSCG0000004882	chr4	95670868	95689827	-
ALDBSSCT0000006641	ALDBSSCG0000004062	chr3	38882297	38884454	+
ALDBSSCT0000009358	ALDBSSCG0000005711	chr6	56802933	56804760	-
ALDBSSCT0000006061	ALDBSSCG0000003711	chr2	147189076	147192155	+
ALDBSSCT0000009664	ALDBSSCG0000005898	chr7	17908768	18326695	+
ALDBSSCT0000006065	ALDBSSCG0000003713	chr2	147267921	147272588	+
ALDBSSCT0000006066	ALDBSSCG0000003714	chr2	147357032	147364076	+
ALDBSSCT0000006068	ALDBSSCG0000003715	chr2	147403790	147405025	+
ALDBSSCT0000006715	ALDBSSCG0000004095	chr3	52224665	52230198	+
ALDBSSCT0000004247	ALDBSSCG0000002574	chr15	92467600	92470041	+
ENSSSCT00000036173	ENSSSCG00000030934	chrX	6807000	6811375	+
ENSSSCT00000034982	ENSSSCG00000030812	chrX	142239538	142241099	+
ALDBSSCT0000003597	ALDBSSCG0000002151	chr14	51169513	51171402	+
ALDBSSCT0000003596	ALDBSSCG0000002150	chr14	51094919	51106707	+
ALDBSSCT0000003595	ALDBSSCG0000002149	chr14	49759489	49760671	+
ALDBSSCT0000011149	ALDBSSCG0000006764	chr9	39888942	39893105	+
ALDBSSCT0000002453	ALDBSSCG0000001486	chr12	44334743	44344300	-
ALDBSSCT0000007043	ALDBSSCG0000004285	chr3	18344308	18354020	-
ALDBSSCT0000010629	ALDBSSCG0000006449	chr8	124241021	124242292	+
ALDBSSCT0000001374	ALDBSSCG0000000845	chr10	9331179	9340927	-
ALDBSSCT0000002835	ALDBSSCG0000001729	chr13	147427560	147428834	+
ALDBSSCT0000000776	ALDBSSCG0000000469	chr1	108470855	108471627	-
ALDBSSCT0000010367	ALDBSSCG0000006296	chr7	130866113	130867866	-
ALDBSSCT0000001372	ALDBSSCG0000000844	chr10	9134326	9245451	-
ALDBSSCT0000003206	ALDBSSCG0000001928	chr13	80729472	80739269	-
ALDBSSCT0000003204	ALDBSSCG0000001928	chr13	80729472	80738839	-
ALDBSSCT0000007957	ALDBSSCG0000004823	chr4	55302085	55304394	-
ENSSSCT00000036410	ENSSSCG00000012774	chrX	141968377	141977756	+
ALDBSSCT0000000171	ALDBSSCG0000000104	chr1	84560285	84564704	+
ALDBSSCT0000000679	ALDBSSCG0000000409	chr1	31515310	31522414	-
ALDBSSCT0000000678	ALDBSSCG0000000408	chr1	31297848	31298556	-
ALDBSSCT0000003758	ALDBSSCG0000002254	chr14	136229932	136245593	+
ALDBSSCT0000008838	ALDBSSCG0000005399	chr6	46563210	46604364	+
ALDBSSCT0000008515	ALDBSSCG0000005180	chr5	18690255	18700648	-
ALDBSSCT0000009611	ALDBSSCG0000005862	chr7	2440658	2441802	+
ALDBSSCT0000011950	ALDBSSCG0000007272	chrX	86697706	86698443	+
ALDBSSCT0000005824	ALDBSSCG0000003542	chr2	17755529	17770980	+
ALDBSSCT0000008210	ALDBSSCG0000004988	chr4	142642598	142645663	-
ALDBSSCT0000008741	ALDBSSCG0000005334	chr6	12314947	12322156	+
ALDBSSCT0000008740	ALDBSSCG0000005333	chr6	12256448	12257831	+
ALDBSSCT0000003295	ALDBSSCG0000001983	chr13	140626946	140632114	-
ALDBSSCT0000005940	ALDBSSCG0000003630	chr2	81306226	81309111	+
ALDBSSCT0000004414	ALDBSSCG0000002688	chr15	36230005	36234763	-
ALDBSSCT0000006625	ALDBSSCG0000004053	chr3	33491616	33493814	+
ALDBSSCT0000008629	ALDBSSCG0000005251	chr5	81203989	81205248	-
ALDBSSCT0000007255	ALDBSSCG0000004399	chr3	90402363	90406702	-
ALDBSSCT0000008185	ALDBSSCG0000004970	chr4	138646089	138649252	-
ALDBSSCT0000006686	ALDBSSCG0000004084	chr3	44171600	44175089	+
ALDBSSCT0000008981	ALDBSSCG0000005497	chr6	91774995	91809183	+
ALDBSSCT0000010896	ALDBSSCG0000006603	chr8	78359320	78367380	-
ENSSSCT00000033774	ENSSSCG00000030777	chr7	27543864	27546194	-
ALDBSSCT0000000518	ALDBSSCG0000000304	chr1	281952666	281953565	+
ALDBSSCT0000000519	ALDBSSCG0000000305	chr1	283142090	283144241	+
ALDBSSCT0000011826	ALDBSSCG0000007180	GL894574.1	67409	68437	+
ALDBSSCT0000003279	ALDBSSCG0000001977	chr13	134107918	134138963	-
ALDBSSCT0000002675	ALDBSSCG0000001624	chr13	77725606	77734057	+
ALDBSSCT0000008820	ALDBSSCG0000005387	chr6	41805551	41828609	+
ALDBSSCT0000008821	ALDBSSCG0000005388	chr6	42424227	42509981	+
ALDBSSCT0000012047	ALDBSSCG0000007345	chrX	74286044	74351676	-
ALDBSSCT0000012046	ALDBSSCG0000007344	chrX	74026107	74026474	-
ALDBSSCT0000012045	ALDBSSCG0000007343	chrX	73952000	73952797	-
ALDBSSCT0000003473	ALDBSSCG0000002094	chr14	15781824	15796541	+
ALDBSSCT0000000905	ALDBSSCG0000000551	chr1	200075380	200091036	-
ALDBSSCT0000002573	ALDBSSCG0000001560	chr13	15754473	15758257	+
ALDBSSCT0000000907	ALDBSSCG0000000553	chr1	200181448	200184643	-
ALDBSSCT0000006688	ALDBSSCG0000004086	chr3	46620779	46786498	+
ENSSSCT00000035899	ENSSSCG00000004600	chr1	126926288	126983240	-
ALDBSSCT0000004463	ALDBSSCG0000002720	chr15	61933261	61946104	-
ALDBSSCT0000006665	ALDBSSCG0000004075	chr3	41436183	41439587	+
ALDBSSCT0000010122	ALDBSSCG0000006166	chr7	36501373	36507633	-
ALDBSSCT0000010255	ALDBSSCG0000006234	chr7	92004978	92018623	-
ALDBSSCT0000008132	ALDBSSCG0000004935	chr4	121137841	121145827	-
ALDBSSCT0000004465	ALDBSSCG0000002721	chr15	62238821	62245865	-
ALDBSSCT0000006662	ALDBSSCG0000004073	chr3	40681037	40683071	+
ALDBSSCT0000000990	ALDBSSCG0000000606	chr1	256197158	256198757	-
ALDBSSCT0000000991	ALDBSSCG0000000607	chr1	256312508	256313537	-
ENSSSCT00000033960	ENSSSCG00000016341	chr15	152431432	152441806	-
ALDBSSCT0000009705	ALDBSSCG0000005927	chr7	34438527	34440851	+
ALDBSSCT0000006569	ALDBSSCG0000004012	chr3	11271607	11272297	+
ALDBSSCT0000011428	ALDBSSCG0000006950	chr9	8096732	8099417	-
ALDBSSCT0000001773	ALDBSSCG0000001073	chr11	64858194	65110370	+
ALDBSSCT0000002849	ALDBSSCG0000001735	chr13	154340612	154766358	+
ALDBSSCT0000001775	ALDBSSCG0000001073	chr11	64858220	65110370	+
ALDBSSCT0000001774	ALDBSSCG0000001073	chr11	64858220	65110370	+
ALDBSSCT0000001478	ALDBSSCG0000000894	chr10	31420928	31421786	-
ALDBSSCT0000011380	ALDBSSCG0000006916	chr9	148528217	148534575	+
ALDBSSCT0000003683	ALDBSSCG0000002204	chr14	95622064	95650704	+
ALDBSSCT0000003682	ALDBSSCG0000002204	chr14	95622064	95650704	+
ENSSSCT00000032840	ENSSSCG00000015549	chr9	136210481	136211692	-
ALDBSSCT0000003685	ALDBSSCG0000002204	chr14	95622122	95650704	+
ALDBSSCT0000004228	ALDBSSCG0000002558	chr15	82629363	82905734	+
ALDBSSCT0000000420	ALDBSSCG0000000248	chr1	212183975	212186249	+
ALDBSSCT0000010839	ALDBSSCG0000006565	chr8	44227819	44228904	-
ALDBSSCT0000007436	ALDBSSCG0000004509	chr4	10385444	10423543	+
ALDBSSCT0000002153	ALDBSSCG0000001290	chr12	8671850	8675844	+
ALDBSSCT0000007822	ALDBSSCG0000004737	chr4	1310864	1311340	-
ALDBSSCT0000000293	ALDBSSCG0000000168	chr1	142577396	142578248	+
ALDBSSCT0000000429	ALDBSSCG0000000255	chr1	220916935	220921050	+
ALDBSSCT0000002406	ALDBSSCG0000001457	chr12	24004719	24010077	-
ALDBSSCT0000000294	ALDBSSCG0000000169	chr1	142834679	142837817	+
ALDBSSCT0000002404	ALDBSSCG0000001455	chr12	23213604	23219751	-
ALDBSSCT0000005682	ALDBSSCG0000003449	chr18	31594746	31609406	-
ALDBSSCT0000005351	ALDBSSCG0000003238	chr17	45622353	45627273	-
ALDBSSCT0000006840	ALDBSSCG0000004170	chr3	117297923	117302330	+
ALDBSSCT0000010059	ALDBSSCG0000006120	chr7	13056635	13321227	-
ALDBSSCT0000012053	ALDBSSCG0000007349	chrX	101331504	101332774	-
ALDBSSCT0000005051	ALDBSSCG0000003047	chr16	74604894	74609511	-
ALDBSSCT0000006656	ALDBSSCG0000004072	chr3	40597416	40602602	+
ALDBSSCT0000005055	ALDBSSCG0000003051	chr16	77444004	77475286	-
ALDBSSCT0000005458	ALDBSSCG0000003307	chr18	12337284	12338258	+
ALDBSSCT0000011208	ALDBSSCG0000006806	chr9	62457891	62465608	+
ALDBSSCT0000009681	ALDBSSCG0000005907	chr7	23062785	23070260	+
ALDBSSCT0000007147	ALDBSSCG0000004347	chr3	48147723	48150246	-
ALDBSSCT0000007140	ALDBSSCG0000004342	chr3	45737517	45739104	-
ALDBSSCT0000011871	ALDBSSCG0000007217	JH118724.1	72322	74342	+
ALDBSSCT0000011847	ALDBSSCG0000007196	GL896183.1	69460	70364	+
ALDBSSCT0000011200	ALDBSSCG0000006800	chr9	57463291	57466040	+
ALDBSSCT0000011201	ALDBSSCG0000006801	chr9	59043535	59050625	+
ALDBSSCT0000005753	ALDBSSCG0000003491	chr18	55987408	55989754	-
ALDBSSCT0000005752	ALDBSSCG0000003490	chr18	55341054	55341457	-
ALDBSSCT0000005618	ALDBSSCG0000003401	chr18	3054014	3057893	-
ALDBSSCT0000000192	ALDBSSCG0000000108	chr1	86970483	86974649	+
ALDBSSCT0000003875	ALDBSSCG0000002329	chr14	43838212	43842012	-
ENSSSCT00000018610	ENSSSCG00000017092	chr16	78282294	78290916	+
ALDBSSCT0000004776	ALDBSSCG0000002906	chr16	42882923	42910819	+
ALDBSSCT0000004024	ALDBSSCG0000002425	chr14	110488911	110494551	-
ALDBSSCT0000003873	ALDBSSCG0000002328	chr14	43461327	43469028	-
ALDBSSCT0000006313	ALDBSSCG0000003858	chr2	66208018	66209782	-
ALDBSSCT0000006356	ALDBSSCG0000003889	chr2	90010530	90011407	-
ALDBSSCT0000011594	ALDBSSCG0000007039	chr9	79701694	79714180	-
ALDBSSCT0000009162	ALDBSSCG0000005584	chr6	151664952	151672336	+
ALDBSSCT0000000055	ALDBSSCG0000000035	chr1	18470168	18473816	+
ALDBSSCT0000000054	ALDBSSCG0000000034	chr1	17166636	17169140	+
ENSSSCT00000034949	ENSSSCG00000031021	chrX	38605879	38612241	-
ALDBSSCT0000008799	ALDBSSCG0000005375	chr6	39693016	39749153	+
ALDBSSCT0000004204	ALDBSSCG0000002541	chr15	66209390	66211593	+
ALDBSSCT0000004203	ALDBSSCG0000002541	chr15	66209228	66219892	+
ALDBSSCT0000004200	ALDBSSCG0000002539	chr15	63711794	63721340	+
ALDBSSCT0000011047	ALDBSSCG0000006705	chr9	3407678	3416160	+
ALDBSSCT0000010908	ALDBSSCG0000006610	chr8	81616692	81631652	-
ENSSSCT00000019996	ENSSSCG00000018401	chr9	108187102	108187423	+
ALDBSSCT0000001056	ALDBSSCG0000000651	chr1	293507083	293508684	-
ALDBSSCT0000005127	ALDBSSCG0000003086	chr17	12830685	12837404	+
ALDBSSCT0000004563	ALDBSSCG0000002773	chr15	106753708	106814992	-
ENSSSCT00000035193	ENSSSCG00000004334	chr1	65478905	65542577	-
ALDBSSCT0000006716	ALDBSSCG0000004095	chr3	52226069	52230198	+
ALDBSSCT0000005534	ALDBSSCG0000003352	chr18	43096878	43205380	+
ALDBSSCT0000001839	ALDBSSCG0000001108	chr11	84542214	84546088	+
ENSSSCT00000036055	ENSSSCG00000007280	chr17	43030475	43114390	+
ALDBSSCT0000009442	ALDBSSCG0000005758	chr6	82228000	82233084	-
ALDBSSCT0000004800	ALDBSSCG0000002918	chr16	52742118	52746929	+
ALDBSSCT0000004802	ALDBSSCG0000002919	chr16	52931554	52933117	+
ALDBSSCT0000009529	ALDBSSCG0000005807	chr6	131315968	131317871	-
ALDBSSCT0000009835	ALDBSSCG0000005990	chr7	79440555	79467978	+
ALDBSSCT0000006383	ALDBSSCG0000003905	chr2	103686258	103826791	-
ALDBSSCT0000009711	ALDBSSCG0000005932	chr7	35767615	35769635	+
ALDBSSCT0000007316	ALDBSSCG0000004441	chr3	118595639	118597927	-
ALDBSSCT0000009432	ALDBSSCG0000005754	chr6	78193363	78195251	-
ALDBSSCT0000007318	ALDBSSCG0000004443	chr3	119326604	119330730	-
ALDBSSCT0000009923	ALDBSSCG0000006042	chr7	114362057	114364091	+
ALDBSSCT0000005086	ALDBSSCG0000003065	chr16	82411093	82413437	-
ALDBSSCT0000002830	ALDBSSCG0000001724	chr13	143232213	143236928	+
ALDBSSCT0000004368	ALDBSSCG0000002649	chr15	152405023	152412240	+
ALDBSSCT0000006997	ALDBSSCG0000004251	chr3	4727106	4728670	-
ALDBSSCT0000009908	ALDBSSCG0000006029	chr7	106107725	106112169	+
ALDBSSCT0000006993	ALDBSSCG0000004247	chr3	2265918	2267867	-
ALDBSSCT0000002208	ALDBSSCG0000001321	chr12	19303316	19313609	+
ENSSSCT00000034217	ENSSSCG00000008496	chr3	109622369	109667785	+
ENSSSCT00000035795	ENSSSCG00000001396	chr7	27210080	27210819	-
ALDBSSCT0000008555	ALDBSSCG0000005204	chr5	37091981	37094016	-
ALDBSSCT0000007728	ALDBSSCG0000004693	chr4	135322155	135322614	+
ALDBSSCT0000007729	ALDBSSCG0000004694	chr4	135582252	135584928	+
ALDBSSCT0000004898	ALDBSSCG0000002969	chr16	13137662	13338554	-
ALDBSSCT0000003089	ALDBSSCG0000001856	chr13	29409657	29478620	-
ALDBSSCT0000011552	ALDBSSCG0000007010	chr9	54385430	54440678	-
ALDBSSCT0000003638	ALDBSSCG0000002178	chr14	72253650	72254927	+
ALDBSSCT0000007044	ALDBSSCG0000004285	chr3	18344308	18354283	-
ALDBSSCT0000006979	ALDBSSCG0000004236	chr3	142624629	142636746	+
ALDBSSCT0000003086	ALDBSSCG0000001854	chr13	29243500	29245708	-
ALDBSSCT0000003080	ALDBSSCG0000001850	chr13	27043724	27046723	-
ALDBSSCT0000000734	ALDBSSCG0000000437	chr1	63934092	63943230	-
ALDBSSCT0000003557	ALDBSSCG0000002131	chr14	41228695	41229448	+
ALDBSSCT0000000733	ALDBSSCG0000000437	chr1	63932800	63943140	-
ALDBSSCT0000001944	ALDBSSCG0000001172	chr11	18603509	18612838	-
ALDBSSCT0000000638	ALDBSSCG0000000384	chr1	10261474	10309143	-
ALDBSSCT0000011989	ALDBSSCG0000007298	chrX	139739133	139740168	+
ALDBSSCT0000003121	ALDBSSCG0000001873	chr13	43546067	43546609	-
ALDBSSCT0000003654	ALDBSSCG0000002185	chr14	78355021	78382745	+
ENSSSCT00000035935	ENSSSCG00000024809	chrX	7340654	7419608	+
ALDBSSCT0000007910	ALDBSSCG0000004792	chr4	21182181	21342552	-
ALDBSSCT0000000385	ALDBSSCG0000000230	chr1	201395070	201478281	+
ALDBSSCT0000009128	ALDBSSCG0000005566	chr6	143488291	143489977	+
ALDBSSCT0000006039	ALDBSSCG0000003695	chr2	138953588	138957771	+
ALDBSSCT0000000083	ALDBSSCG0000000049	chr1	28836976	28869044	+
ALDBSSCT0000006136	ALDBSSCG0000003750	chr2	3570506	3575321	-
ALDBSSCT0000006024	ALDBSSCG0000003685	chr2	131121961	131135113	+
ALDBSSCT0000001283	ALDBSSCG0000000779	chr10	56023529	56024570	+
ENSSSCT00000001522	ENSSSCG00000001396	chr7	27626992	27630394	-
ALDBSSCT0000006138	ALDBSSCG0000003751	chr2	3880159	3880641	-
ALDBSSCT0000006030	ALDBSSCG0000003690	chr2	135856117	135857177	+
ALDBSSCT0000004291	ALDBSSCG0000002600	chr15	117963936	117965758	+
ALDBSSCT0000001288	ALDBSSCG0000000781	chr10	57463517	57464061	+
ALDBSSCT0000002201	ALDBSSCG0000001317	chr12	18671566	18675882	+
ALDBSSCT0000006740	ALDBSSCG0000004114	chr3	59995062	60010272	+
ALDBSSCT0000008257	ALDBSSCG0000005010	chr5	7737474	7741619	+
ALDBSSCT0000004479	ALDBSSCG0000002730	chr15	66239842	66244077	-
ALDBSSCT0000008703	ALDBSSCG0000005310	chr6	1761731	1765861	+
ALDBSSCT0000006747	ALDBSSCG0000004121	chr3	71143025	71151623	+
ALDBSSCT0000000773	ALDBSSCG0000000466	chr1	103294374	103334163	-
ALDBSSCT0000006667	ALDBSSCG0000004076	chr3	41484115	41494049	+
ENSSSCT00000035247	ENSSSCG00000030761	chrX	49369699	49474772	-
ALDBSSCT0000002203	ALDBSSCG0000001319	chr12	19118854	19122759	+
ALDBSSCT0000004516	ALDBSSCG0000002747	chr15	84786646	84787181	-
ALDBSSCT0000005984	ALDBSSCG0000003655	chr2	112804220	112818666	+
ALDBSSCT0000006661	ALDBSSCG0000004073	chr3	40681007	40683071	+
ALDBSSCT0000002806	ALDBSSCG0000001706	chr13	130911074	130913316	+
ALDBSSCT0000002807	ALDBSSCG0000001707	chr13	131001727	131004200	+
ALDBSSCT0000006526	ALDBSSCG0000003989	chr3	1169914	1184494	+
ALDBSSCT0000009227	ALDBSSCG0000005622	chr6	10689340	10715443	-
ALDBSSCT0000003729	ALDBSSCG0000002231	chr14	117227502	117243637	+
ALDBSSCT0000009786	ALDBSSCG0000005966	chr7	57464771	57474117	+
ALDBSSCT0000011177	ALDBSSCG0000006785	chr9	51715326	51717022	+
ALDBSSCT0000000643	ALDBSSCG0000000385	chr1	10818920	10856060	-
ALDBSSCT0000011174	ALDBSSCG0000006784	chr9	51655582	51670383	+
ALDBSSCT0000002808	ALDBSSCG0000001707	chr13	131001727	131007055	+
ALDBSSCT0000003723	ALDBSSCG0000002226	chr14	113384170	113403926	+
ALDBSSCT0000003885	ALDBSSCG0000002336	chr14	45936745	45938551	-
ALDBSSCT0000011846	ALDBSSCG0000007195	GL896152.2	24065	25471	-
ALDBSSCT0000000127	ALDBSSCG0000000079	chr1	56854870	56870820	+
ENSSSCT00000020156	ENSSSCG00000018561	chr18	15956591	15956900	-
ALDBSSCT0000006555	ALDBSSCG0000004003	chr3	9548957	9550150	+
ALDBSSCT0000002204	ALDBSSCG0000001320	chr12	19279324	19289362	+
ALDBSSCT0000000081	ALDBSSCG0000000047	chr1	24696993	24792176	+
ALDBSSCT0000000129	ALDBSSCG0000000080	chr1	58894995	58896982	+
ALDBSSCT0000002207	ALDBSSCG0000001321	chr12	19303316	19313609	+
ALDBSSCT0000000085	ALDBSSCG0000000050	chr1	29852107	29872257	+
ALDBSSCT0000002202	ALDBSSCG0000001318	chr12	18771278	18788220	+
ALDBSSCT0000000087	ALDBSSCG0000000052	chr1	31017965	31137080	+
ALDBSSCT0000002338	ALDBSSCG0000001414	chr12	3681008	3734880	-
ALDBSSCT0000004580	ALDBSSCG0000002784	chr15	117344949	117350079	-
ALDBSSCT0000008954	ALDBSSCG0000005482	chr6	81651843	81656743	+
ALDBSSCT0000008955	ALDBSSCG0000005482	chr6	81651843	81660219	+
ALDBSSCT0000008467	ALDBSSCG0000005144	chr5	106499744	106501189	+
ALDBSSCT0000004587	ALDBSSCG0000002789	chr15	122101803	122135295	-
ALDBSSCT0000004428	ALDBSSCG0000002697	chr15	44734202	44739794	-
ALDBSSCT0000001482	ALDBSSCG0000000898	chr10	32946840	33037285	-
ALDBSSCT0000002330	ALDBSSCG0000001408	chr12	1425943	1427525	-
ALDBSSCT0000010931	ALDBSSCG0000006631	chr8	103683150	103684904	-
ALDBSSCT0000011890	ALDBSSCG0000007231	JH118996.1	109324	115278	+
ALDBSSCT0000008894	ALDBSSCG0000005435	chr6	57439976	57445037	+
ALDBSSCT0000008897	ALDBSSCG0000005438	chr6	57881482	57884588	+
ALDBSSCT0000008919	ALDBSSCG0000005451	chr6	63952115	63955469	+
ALDBSSCT0000007039	ALDBSSCG0000004284	chr3	18229078	18234337	-
ALDBSSCT0000001737	ALDBSSCG0000001051	chr11	26321401	26323326	+
ALDBSSCT0000001736	ALDBSSCG0000001051	chr11	26321259	26323426	+
ALDBSSCT0000002965	ALDBSSCG0000001783	chr13	200136376	200140268	+
ALDBSSCT0000002964	ALDBSSCG0000001783	chr13	200136375	200140268	+
ALDBSSCT0000007563	ALDBSSCG0000004589	chr4	73876899	73877852	+
ALDBSSCT0000000541	ALDBSSCG0000000322	chr1	301365113	301378017	+
ALDBSSCT0000008870	ALDBSSCG0000005420	chr6	52055851	52063194	+
ALDBSSCT0000008873	ALDBSSCG0000005422	chr6	52940067	52971171	+
ALDBSSCT0000000014	ALDBSSCG0000000008	chr1	3680953	3688877	+
ALDBSSCT0000000398	ALDBSSCG0000000231	chr1	201795313	201814332	+
ALDBSSCT0000000399	ALDBSSCG0000000232	chr1	202677600	202678228	+
ALDBSSCT0000002686	ALDBSSCG0000001631	chr13	81539717	81540448	+
ALDBSSCT0000008879	ALDBSSCG0000005426	chr6	54602687	54608041	+
ENSSSCT00000033840	ENSSSCG00000017791	chr12	47804289	47871712	+
ALDBSSCT0000000462	ALDBSSCG0000000274	chr1	252245129	252365670	+
ALDBSSCT0000003426	ALDBSSCG0000002064	chr13	213487577	213492982	-
ALDBSSCT0000009195	ALDBSSCG0000005599	chr6	250080	251725	-
ALDBSSCT0000003424	ALDBSSCG0000002062	chr13	213109035	213109780	-
ALDBSSCT0000011956	ALDBSSCG0000007276	chrX	98830979	98831537	+
ALDBSSCT0000007865	ALDBSSCG0000004760	chr4	9144985	9146322	-
ALDBSSCT0000002115	ALDBSSCG0000001268	chr12	1573103	1577376	+
ALDBSSCT0000002116	ALDBSSCG0000001268	chr12	1573103	1579448	+
ALDBSSCT0000011524	ALDBSSCG0000007002	chr9	46852304	46890768	-
ALDBSSCT0000002118	ALDBSSCG0000001269	chr12	2894882	3133363	+
ALDBSSCT0000002119	ALDBSSCG0000001270	chr12	3348818	3351941	+
ALDBSSCT0000005315	ALDBSSCG0000003218	chr17	32131172	32134669	-
ALDBSSCT0000005312	ALDBSSCG0000003216	chr17	29866786	29870712	-
ALDBSSCT0000005310	ALDBSSCG0000003214	chr17	29513736	29521732	-
ALDBSSCT0000012083	ALDBSSCG0000007367	chrX	126642324	126650703	-
ALDBSSCT0000000490	ALDBSSCG0000000292	chr1	267659342	267660158	+
ALDBSSCT0000004736	ALDBSSCG0000002884	chr16	29293023	29297134	+
ALDBSSCT0000002898	ALDBSSCG0000001753	chr13	169117136	169133256	+
ALDBSSCT0000005316	ALDBSSCG0000003219	chr17	32147014	32153418	-
ALDBSSCT0000007945	ALDBSSCG0000004816	chr4	46416246	46419945	-
ALDBSSCT0000012026	ALDBSSCG0000007331	chrX	48401785	48405653	-
ALDBSSCT0000011708	ALDBSSCG0000007107	chr9	134731661	134733751	-
ALDBSSCT0000011957	ALDBSSCG0000007277	chrX	102841320	102859451	+
ENSSSCT00000033365	ENSSSCG00000024809	chrX	7339507	7377347	+
ALDBSSCT0000002233	ALDBSSCG0000001341	chr12	35290308	35295411	+
ALDBSSCT0000001422	ALDBSSCG0000000860	chr10	14969586	14976442	-
ALDBSSCT0000004144	ALDBSSCG0000002497	chr15	16127716	16279150	+
ALDBSSCT0000007106	ALDBSSCG0000004322	chr3	38938179	38940065	-
ALDBSSCT0000004069	ALDBSSCG0000002461	chr14	139223097	139224308	-
ALDBSSCT0000004067	ALDBSSCG0000002459	chr14	139034758	139051363	-
ALDBSSCT0000006453	ALDBSSCG0000003937	chr2	140550670	140552295	-
ALDBSSCT0000011105	ALDBSSCG0000006741	chr9	22266566	22268861	+
ENSSSCT00000016939	ENSSSCG00000015549	chr9	136210073	136224410	-
ALDBSSCT0000010125	ALDBSSCG0000006166	chr7	36503324	36513546	-
ALDBSSCT0000004325	ALDBSSCG0000002617	chr15	133355811	133356224	+
ALDBSSCT0000010089	ALDBSSCG0000006142	chr7	24746290	24747141	-
ALDBSSCT0000010016	ALDBSSCG0000006091	chr7	3173962	3184714	-
ALDBSSCT0000004326	ALDBSSCG0000002618	chr15	133508196	133509100	+
ALDBSSCT0000000264	ALDBSSCG0000000158	chr1	132625715	132627472	+
ALDBSSCT0000002748	ALDBSSCG0000001669	chr13	104750739	104759064	+
ALDBSSCT0000000266	ALDBSSCG0000000160	chr1	136407520	136441360	+
ALDBSSCT0000008511	ALDBSSCG0000005176	chr5	14875924	14882059	-
ALDBSSCT0000011481	ALDBSSCG0000006989	chr9	40835708	40837689	-
ALDBSSCT0000006815	ALDBSSCG0000004157	chr3	103473621	103479372	+
ALDBSSCT0000002743	ALDBSSCG0000001664	chr13	99512724	99514023	+
ALDBSSCT0000005365	ALDBSSCG0000003247	chr17	51530535	51537667	-
ALDBSSCT0000005003	ALDBSSCG0000003019	chr16	55158635	55170608	-
ALDBSSCT0000009714	ALDBSSCG0000005934	chr7	37642289	37660260	+
ALDBSSCT0000005160	ALDBSSCG0000003113	chr17	41361005	41361853	+
ALDBSSCT0000010008	ALDBSSCG0000006085	chr7	2451928	2454600	-
ALDBSSCT0000005162	ALDBSSCG0000003115	chr17	42200943	42205609	+
ALDBSSCT0000009749	ALDBSSCG0000005948	chr7	44057391	44076573	+
ALDBSSCT0000002962	ALDBSSCG0000001783	chr13	200136361	200140268	+
ALDBSSCT0000011257	ALDBSSCG0000006838	chr9	82461632	82481719	+
ALDBSSCT0000007358	ALDBSSCG0000004468	chr3	135035044	135036145	-
ALDBSSCT0000005761	ALDBSSCG0000003497	chr18	59704016	59709079	-
ALDBSSCT0000010092	ALDBSSCG0000006144	chr7	26691565	26694519	-
ALDBSSCT0000007109	ALDBSSCG0000004325	chr3	40063804	40068561	-
ALDBSSCT0000005768	ALDBSSCG0000003504	chr2	1415104	1416537	+
ALDBSSCT0000005769	ALDBSSCG0000003505	chr2	1464623	1467783	+
ALDBSSCT0000007199	ALDBSSCG0000004377	chr3	75945774	75949228	-
ALDBSSCT0000003905	ALDBSSCG0000002347	chr14	49655106	49657660	-
ALDBSSCT0000009474	ALDBSSCG0000005778	chr6	96138072	96163022	-
ALDBSSCT0000009475	ALDBSSCG0000005778	chr6	96138072	96163022	-
ALDBSSCT0000007816	ALDBSSCG0000004733	chr4	127816	128340	-
ALDBSSCT0000003902	ALDBSSCG0000002346	chr14	49594272	49603295	-
ALDBSSCT0000010729	ALDBSSCG0000006491	chr8	946562	952538	-
ALDBSSCT0000001886	ALDBSSCG0000001141	chr11	6809063	6819486	-
ALDBSSCT0000000301	ALDBSSCG0000000174	chr1	146324885	146333427	+
ALDBSSCT0000001882	ALDBSSCG0000001140	chr11	6668885	6749905	-
ALDBSSCT0000009479	ALDBSSCG0000005780	chr6	97634443	97650721	-
ALDBSSCT0000002680	ALDBSSCG0000001628	chr13	79442395	79444612	+
ALDBSSCT0000005463	ALDBSSCG0000003312	chr18	14792270	14794714	+
ALDBSSCT0000004555	ALDBSSCG0000002770	chr15	103457461	103543052	-
ALDBSSCT0000001168	ALDBSSCG0000000721	chr10	25782089	25785105	+
ENSSSCT00000029022	ENSSSCG00000027271	JH118620.1	62821	63121	+
ALDBSSCT0000004498	ALDBSSCG0000002740	chr15	74347829	74354102	-
ALDBSSCT0000004497	ALDBSSCG0000002739	chr15	73809125	73885492	-
ALDBSSCT0000005507	ALDBSSCG0000003337	chr18	32350976	32409013	+
ALDBSSCT0000005504	ALDBSSCG0000003335	chr18	32047873	32066601	+
ALDBSSCT0000008137	ALDBSSCG0000004938	chr4	121890250	121897830	-
ALDBSSCT0000011272	ALDBSSCG0000006842	chr9	85564709	85595204	+
ALDBSSCT0000005503	ALDBSSCG0000003335	chr18	32046733	32066601	+
ALDBSSCT0000009980	ALDBSSCG0000006070	chr7	129269254	129270012	+
ALDBSSCT0000004490	ALDBSSCG0000002736	chr15	71765715	71823466	-
ALDBSSCT0000006355	ALDBSSCG0000003889	chr2	90010530	90011407	-
ALDBSSCT0000001865	ALDBSSCG0000001128	chr11	3470218	3471113	-
ALDBSSCT0000000849	ALDBSSCG0000000514	chr1	155388524	155395554	-
ALDBSSCT0000011239	ALDBSSCG0000006824	chr9	72046908	72055167	+
ALDBSSCT0000005260	ALDBSSCG0000003173	chr17	67415361	67417833	+
ALDBSSCT0000003041	ALDBSSCG0000001821	chr13	218076783	218078538	+
ALDBSSCT0000001907	ALDBSSCG0000001154	chr11	12808486	12814270	-
ENSSSCT00000035380	ENSSSCG00000031004	chrX	22075081	22076913	+
ALDBSSCT0000003044	ALDBSSCG0000001823	chr13	218271389	218271932	+
ALDBSSCT0000000843	ALDBSSCG0000000509	chr1	152624113	152625032	-
ALDBSSCT0000009973	ALDBSSCG0000006066	chr7	128587510	128588531	+
ALDBSSCT0000006272	ALDBSSCG0000003834	chr2	49220742	49256853	-
ALDBSSCT0000011183	ALDBSSCG0000006791	chr9	53331050	53334663	+
ALDBSSCT0000006278	ALDBSSCG0000003837	chr2	50583172	50615710	-
ALDBSSCT0000000073	ALDBSSCG0000000042	chr1	23666364	23683362	+
ALDBSSCT0000010316	ALDBSSCG0000006274	chr7	122222654	122224641	-
ALDBSSCT0000007814	ALDBSSCG0000004731	chr4	143207104	143207986	+
ALDBSSCT0000010893	ALDBSSCG0000006600	chr8	75349973	75353117	-
ALDBSSCT0000003851	ALDBSSCG0000002313	chr14	33680425	33689987	-
ALDBSSCT0000006709	ALDBSSCG0000004091	chr3	51371746	51373356	+
ALDBSSCT0000010897	ALDBSSCG0000006604	chr8	78375534	78377847	-
ALDBSSCT0000010894	ALDBSSCG0000006601	chr8	75370483	75372023	-
ALDBSSCT0000006070	ALDBSSCG0000003717	chr2	149151793	149156337	+
ALDBSSCT0000004250	ALDBSSCG0000002575	chr15	93751638	93777171	+
ALDBSSCT0000010950	ALDBSSCG0000006636	chr8	108197217	108199556	-
ALDBSSCT0000008426	ALDBSSCG0000005114	chr5	91840839	91872548	+
ALDBSSCT0000010725	ALDBSSCG0000006491	chr8	946562	952275	-
ALDBSSCT0000006702	ALDBSSCG0000004089	chr3	47887214	47913034	+
ALDBSSCT0000005212	ALDBSSCG0000003147	chr17	57151362	57158294	+
ALDBSSCT0000000826	ALDBSSCG0000000500	chr1	146460084	146463647	-
ALDBSSCT0000005214	ALDBSSCG0000003149	chr17	57953810	58031200	+
ALDBSSCT0000007070	ALDBSSCG0000004297	chr3	25694421	25703624	-
ALDBSSCT0000011600	ALDBSSCG0000007043	chr9	83363024	83393781	-
ALDBSSCT0000009300	ALDBSSCG0000005673	chr6	41969234	41993030	-
ALDBSSCT0000000766	ALDBSSCG0000000461	chr1	97115283	97121416	-
ALDBSSCT0000003602	ALDBSSCG0000002154	chr14	51546850	51547751	+
ALDBSSCT0000003601	ALDBSSCG0000002154	chr14	51546564	51547751	+
ALDBSSCT0000003606	ALDBSSCG0000002158	chr14	53504968	53505821	+
ALDBSSCT0000008900	ALDBSSCG0000005440	chr6	58332909	58335284	+
ALDBSSCT0000000164	ALDBSSCG0000000099	chr1	81721000	81726044	+
ALDBSSCT0000008085	ALDBSSCG0000004907	chr4	109825189	109830902	-
ALDBSSCT0000006002	ALDBSSCG0000003667	chr2	121832962	121834335	+
ALDBSSCT0000006003	ALDBSSCG0000003668	chr2	122148061	122235374	+
ALDBSSCT0000011814	ALDBSSCG0000007171	GL893620.1	40044	41980	+
ALDBSSCT0000008229	ALDBSSCG0000004997	chr5	1531033	1534106	+
ALDBSSCT0000006004	ALDBSSCG0000003669	chr2	122403735	122491639	+
ALDBSSCT0000008739	ALDBSSCG0000005332	chr6	12007618	12008074	+
ALDBSSCT0000005955	ALDBSSCG0000003639	chr2	92317501	92365020	+
ALDBSSCT0000009145	ALDBSSCG0000005574	chr6	147752785	147757781	+
ALDBSSCT0000005819	ALDBSSCG0000003538	chr2	16111642	16112999	+
ALDBSSCT0000008222	ALDBSSCG0000004991	chr5	337451	339580	+
ALDBSSCT0000003280	ALDBSSCG0000001977	chr13	134107918	134138963	-
ALDBSSCT0000008637	ALDBSSCG0000005257	chr5	83802699	83804744	-
ALDBSSCT0000008636	ALDBSSCG0000005256	chr5	82959879	82960705	-
ALDBSSCT0000005180	ALDBSSCG0000003126	chr17	47214004	47215890	+
ALDBSSCT0000003536	ALDBSSCG0000002121	chr14	34262408	34471455	+
ALDBSSCT0000006635	ALDBSSCG0000004056	chr3	38450784	38462250	+
ALDBSSCT0000007110	ALDBSSCG0000004326	chr3	40145454	40147223	-
ALDBSSCT0000008630	ALDBSSCG0000005252	chr5	81373620	81375887	-
ALDBSSCT0000006639	ALDBSSCG0000004060	chr3	38843207	38846671	+
ENSSSCT00000026977	ENSSSCG00000004334	chr1	65479754	65542430	-
ALDBSSCT0000008910	ALDBSSCG0000005446	chr6	62602661	62663912	+
ALDBSSCT0000011351	ALDBSSCG0000006894	chr9	136227531	136229088	+
ALDBSSCT0000010434	ALDBSSCG0000006339	chr8	30782247	30784949	+
ALDBSSCT0000009751	ALDBSSCG0000005949	chr7	44762265	44765879	+
ALDBSSCT0000007674	ALDBSSCG0000004660	chr4	111540349	111542601	+
ALDBSSCT0000011788	ALDBSSCG0000007149	GL892291.2	17081	17857	-
ENSSSCT00000013966	ENSSSCG00000012774	chrX	141972994	141977757	+
ALDBSSCT0000004164	ALDBSSCG0000002515	chr15	36235055	36264356	+
ALDBSSCT0000006417	ALDBSSCG0000003920	chr2	124465041	124469545	-
ALDBSSCT0000004285	ALDBSSCG0000002595	chr15	116493490	116515827	+
ALDBSSCT0000002648	ALDBSSCG0000001610	chr13	60043650	60044552	+
ALDBSSCT0000006410	ALDBSSCG0000003916	chr2	121363171	121370570	-
ENSSSCT00000021112	ENSSSCG00000019517	GL895038.1	95518	95845	-
ALDBSSCT0000000505	ALDBSSCG0000000299	chr1	278467958	278469852	+
ALDBSSCT0000003307	ALDBSSCG0000001989	chr13	144607493	144621200	-
ALDBSSCT0000003304	ALDBSSCG0000001986	chr13	141254268	141257694	-
ALDBSSCT0000002392	ALDBSSCG0000001450	chr12	20388991	20389633	-
ALDBSSCT0000003303	ALDBSSCG0000001985	chr13	140785770	140786921	-
ALDBSSCT0000008833	ALDBSSCG0000005395	chr6	44781588	44782741	+
ALDBSSCT0000009237	ALDBSSCG0000005628	chr6	12429782	12432305	-
ALDBSSCT0000010302	ALDBSSCG0000006263	chr7	110319998	110352564	-
ALDBSSCT0000000937	ALDBSSCG0000000578	chr1	223964885	223969102	-
ALDBSSCT0000010184	ALDBSSCG0000006202	chr7	63763302	63772012	-
ALDBSSCT0000011211	ALDBSSCG0000006806	chr9	62458024	62465608	+
ALDBSSCT0000003460	ALDBSSCG0000002086	chr14	7275434	7279293	+
ALDBSSCT0000005643	ALDBSSCG0000003421	chr18	9679415	9684475	-
ALDBSSCT0000003469	ALDBSSCG0000002090	chr14	11546784	11558416	+
ALDBSSCT0000002266	ALDBSSCG0000001368	chr12	49290521	49295398	+
ALDBSSCT0000004471	ALDBSSCG0000002725	chr15	63711797	63721337	-
ALDBSSCT0000000988	ALDBSSCG0000000606	chr1	256190560	256198688	-
ALDBSSCT0000011822	ALDBSSCG0000007178	GL893911.1	25543	26563	+
ALDBSSCT0000008828	ALDBSSCG0000005392	chr6	44528417	44535714	+
ALDBSSCT0000002365	ALDBSSCG0000001430	chr12	10689622	10699958	-
ALDBSSCT0000007398	ALDBSSCG0000004485	chr3	144248102	144249622	-
ALDBSSCT0000002240	ALDBSSCG0000001347	chr12	39655190	39656750	+
ALDBSSCT0000004777	ALDBSSCG0000002906	chr16	42882923	42910819	+
ALDBSSCT0000004775	ALDBSSCG0000002906	chr16	42882798	42946220	+
ALDBSSCT0000002245	ALDBSSCG0000001350	chr12	40395110	40403787	+
ALDBSSCT0000002246	ALDBSSCG0000001351	chr12	40853963	40855211	+
ALDBSSCT0000009995	ALDBSSCG0000006081	chr7	134221247	134228645	+
ALDBSSCT0000002993	ALDBSSCG0000001796	chr13	207354082	207356905	+
ALDBSSCT0000006558	ALDBSSCG0000004004	chr3	9634233	9639958	+
ALDBSSCT0000011924	ALDBSSCG0000007257	chrX	45932514	45934823	+
ALDBSSCT0000002851	ALDBSSCG0000001735	chr13	154388165	154739920	+
ALDBSSCT0000000185	ALDBSSCG0000000108	chr1	86961600	86986050	+
ALDBSSCT0000006556	ALDBSSCG0000004004	chr3	9631703	9639958	+
ALDBSSCT0000011845	ALDBSSCG0000007194	GL895994.1	42341	45385	+
ALDBSSCT0000002854	ALDBSSCG0000001735	chr13	154760556	154766358	+
ALDBSSCT0000001462	ALDBSSCG0000000882	chr10	22943192	22944504	-
ALDBSSCT0000000346	ALDBSSCG0000000207	chr1	179704451	179706225	+
ALDBSSCT0000003942	ALDBSSCG0000002374	chr14	66515034	66519276	-
ALDBSSCT0000000343	ALDBSSCG0000000204	chr1	175983890	175993067	+
ALDBSSCT0000008716	ALDBSSCG0000005318	chr6	4247511	4255438	+
ALDBSSCT0000003946	ALDBSSCG0000002377	chr14	68150707	68152942	-
ALDBSSCT0000003947	ALDBSSCG0000002378	chr14	69000516	69222309	-
ALDBSSCT0000002410	ALDBSSCG0000001459	chr12	25387564	25391583	-
ALDBSSCT0000002412	ALDBSSCG0000001460	chr12	26667004	26683382	-
ENSSSCT00000022185	ENSSSCG00000020590	chr3	59022768	59023034	+
ALDBSSCT0000006855	ALDBSSCG0000004178	chr3	120658643	120662690	+
ENSSSCT00000004012	ENSSSCG00000003617	chr6	82743348	82758576	+
ALDBSSCT0000006856	ALDBSSCG0000004178	chr3	120659769	120663895	+
ALDBSSCT0000002026	ALDBSSCG0000001222	chr11	72064788	72066470	-
ALDBSSCT0000006852	ALDBSSCG0000004175	chr3	119943334	119949945	+
ALDBSSCT0000010054	ALDBSSCG0000006116	chr7	12427507	12428980	-
ALDBSSCT0000004142	ALDBSSCG0000002495	chr15	15497573	15498643	+
ALDBSSCT0000006859	ALDBSSCG0000004180	chr3	121645708	121653341	+
ALDBSSCT0000006858	ALDBSSCG0000004179	chr3	121628683	121658017	+
ALDBSSCT0000004737	ALDBSSCG0000002885	chr16	29345928	29346570	+
ALDBSSCT0000007092	ALDBSSCG0000004311	chr3	34638450	34639357	-
ALDBSSCT0000004600	ALDBSSCG0000002798	chr15	128201901	128230492	-
ALDBSSCT0000007158	ALDBSSCG0000004353	chr3	51428337	51492277	-
ALDBSSCT0000005600	ALDBSSCG0000003388	chr18	59938947	60049639	+
ALDBSSCT0000010618	ALDBSSCG0000006441	chr8	119934739	119950298	+
ALDBSSCT0000007152	ALDBSSCG0000004349	chr3	48612334	48633134	-
ALDBSSCT0000004608	ALDBSSCG0000002804	chr15	133932881	133947822	-
ALDBSSCT0000011214	ALDBSSCG0000006807	chr9	63142961	63152414	+
ALDBSSCT0000007155	ALDBSSCG0000004350	chr3	48597838	48600862	-
ALDBSSCT0000011746	ALDBSSCG0000007126	chr9	144770499	144800784	-
ALDBSSCT0000006308	ALDBSSCG0000003857	chr2	65442321	65447759	-
ALDBSSCT0000007486	ALDBSSCG0000004540	chr4	25493347	25549725	+
ALDBSSCT0000001515	ALDBSSCG0000000920	chr10	44969685	45008055	-
ALDBSSCT0000004034	ALDBSSCG0000002433	chr14	117177510	117199078	-
ALDBSSCT0000001517	ALDBSSCG0000000921	chr10	45718755	45783378	-
ALDBSSCT0000000186	ALDBSSCG0000000108	chr1	86961611	86986593	+
ALDBSSCT0000006300	ALDBSSCG0000003853	chr2	65131761	65134850	-
ALDBSSCT0000006302	ALDBSSCG0000003854	chr2	65164411	65165900	-
ALDBSSCT0000006305	ALDBSSCG0000003856	chr2	65336211	65338114	-
ALDBSSCT0000009078	ALDBSSCG0000005540	chr6	125496907	125500573	+
ALDBSSCT0000011581	ALDBSSCG0000007032	chr9	72663396	72666726	-
ALDBSSCT0000011454	ALDBSSCG0000006969	chr9	19134172	19136429	-
