# Supplementary material for: Comprehensive Genomic Characterization Analysis of lncRNAs in Cells With Porcine Delta Coronavirus Infection
Source: Front Microbiol. 2020 Jan 28;10:3036. doi: 10.3389/fmicb.2019.03036 (PMC6999024; doi:10.3389/fmicb.2019.03036)
Supplement: Supplementary file 5 [file Table_5.xlsx]

## Sheet: co-location
GO_accession	Description	Term_type	Over_represented_pValue	Corrected_pValue	DEG_item	DEG_list	Bg_item	Bg_list	Gene_names
GO:0065004	protein-DNA complex assembly	biological_process	6.8428e-07	0.00038127	17	1505	29	4730	ENSSSCG00000021860,ENSSSCG00000018034,ENSSSCG00000002328,ENSSSCG00000021920,ENSSSCG00000016440,ENSSSCG00000026930,ENSSSCG00000026572,ENSSSCG00000021101,ENSSSCG00000025957,ENSSSCG00000008690,ENSSSCG00000001177,ENSSSCG00000029773,ENSSSCG00000025484,ENSSSCG00000030023,ENSSSCG00000001471,ENSSSCG00000022049,ENSSSCG00000026668
GO:0006323	DNA packaging	biological_process	7.1242e-07	0.00038127	14	1505	21	4730	ENSSSCG00000029773,ENSSSCG00000001177,ENSSSCG00000026572,ENSSSCG00000021101,ENSSSCG00000025957,ENSSSCG00000030023,ENSSSCG00000018034,ENSSSCG00000021860,ENSSSCG00000022049,ENSSSCG00000016440,ENSSSCG00000001471,ENSSSCG00000026930,ENSSSCG00000016533,ENSSSCG00000026668
GO:0006333	chromatin assembly or disassembly	biological_process	8.3866e-07	0.00042932	14	1505	21	4730	ENSSSCG00000001471,ENSSSCG00000022049,ENSSSCG00000016440,ENSSSCG00000026668,ENSSSCG00000026930,ENSSSCG00000029773,ENSSSCG00000001177,ENSSSCG00000021101,ENSSSCG00000026572,ENSSSCG00000025957,ENSSSCG00000018034,ENSSSCG00000021860,ENSSSCG00000016435,ENSSSCG00000030023
GO:0071824	protein-DNA complex subunit organization	biological_process	9.1503e-07	0.0004489	18	1505	32	4730	ENSSSCG00000025484,ENSSSCG00000026572,ENSSSCG00000021101,ENSSSCG00000025957,ENSSSCG00000029773,ENSSSCG00000008690,ENSSSCG00000001177,ENSSSCG00000030023,ENSSSCG00000016435,ENSSSCG00000022049,ENSSSCG00000001471,ENSSSCG00000026668,ENSSSCG00000002328,ENSSSCG00000021920,ENSSSCG00000021860,ENSSSCG00000018034,ENSSSCG00000016440,ENSSSCG00000026930
GO:0031497	chromatin assembly	biological_process	9.8761e-07	0.00044896	13	1505	19	4730	ENSSSCG00000026930,ENSSSCG00000026668,ENSSSCG00000022049,ENSSSCG00000016440,ENSSSCG00000001471,ENSSSCG00000030023,ENSSSCG00000018034,ENSSSCG00000021860,ENSSSCG00000029773,ENSSSCG00000001177,ENSSSCG00000021101,ENSSSCG00000025957,ENSSSCG00000026572
GO:0034728	nucleosome organization	biological_process	9.9142e-07	0.00044896	13	1505	19	4730	ENSSSCG00000001471,ENSSSCG00000016440,ENSSSCG00000022049,ENSSSCG00000026668,ENSSSCG00000026930,ENSSSCG00000021101,ENSSSCG00000025957,ENSSSCG00000026572,ENSSSCG00000001177,ENSSSCG00000029773,ENSSSCG00000021860,ENSSSCG00000030023,ENSSSCG00000016435
GO:0006334	nucleosome assembly	biological_process	1.4102e-06	0.00061497	12	1505	17	4730	ENSSSCG00000026930,ENSSSCG00000026668,ENSSSCG00000022049,ENSSSCG00000016440,ENSSSCG00000001471,ENSSSCG00000030023,ENSSSCG00000021860,ENSSSCG00000001177,ENSSSCG00000029773,ENSSSCG00000026572,ENSSSCG00000021101,ENSSSCG00000025957
GO:0044260	cellular macromolecule metabolic process	biological_process	2.9106e-05	0.010385	340	1505	1456	4730	ENSSSCG00000008878,ENSSSCG00000020933,ENSSSCG00000016857,ENSSSCG00000025379,ENSSSCG00000004700,ENSSSCG00000002822,ENSSSCG00000004088,ENSSSCG00000023016,ENSSSCG00000024113,ENSSSCG00000020991,ENSSSCG00000009420,ENSSSCG00000004711,ENSSSCG00000028124,ENSSSCG00000024680,ENSSSCG00000000198,ENSSSCG00000011521,ENSSSCG00000001156,ENSSSCG00000021354,ENSSSCG00000021332,ENSSSCG00000022559,ENSSSCG00000009806,…
GO:0006351	transcription, DNA-templated	biological_process	6.8644e-05	0.02245	143	1505	545	4730	ENSSSCG00000012531,ENSSSCG00000003986,ENSSSCG00000027140,ENSSSCG00000010098,ENSSSCG00000011810,ENSSSCG00000012083,ENSSSCG00000024174,ENSSSCG00000002941,ENSSSCG00000027924,ENSSSCG00000005680,ENSSSCG00000028485,ENSSSCG00000022507,ENSSSCG00000029641,ENSSSCG00000002328,ENSSSCG00000021920,ENSSSCG00000008061,ENSSSCG00000029617,ENSSSCG00000000203,ENSSSCG00000005702,ENSSSCG00000008690,ENSSSCG00000011776,…
GO:0097659	nucleic acid-templated transcription	biological_process	7.6678e-05	0.0244	143	1505	546	4730	ENSSSCG00000008878,ENSSSCG00000016857,ENSSSCG00000020933,ENSSSCG00000004709,ENSSSCG00000025429,ENSSSCG00000029773,ENSSSCG00000023016,ENSSSCG00000024113,ENSSSCG00000014430,ENSSSCG00000020991,ENSSSCG00000004956,ENSSSCG00000009420,ENSSSCG00000026045,ENSSSCG00000007970,ENSSSCG00000026141,ENSSSCG00000009071,ENSSSCG00000000488,ENSSSCG00000024680,ENSSSCG00000001156,ENSSSCG00000015984,ENSSSCG00000021332,…
GO:0005515	protein binding	molecular_function	2.2081e-08	1.857e-05	533	1505	2332	4730	ENSSSCG00000002455,ENSSSCG00000016742,ENSSSCG00000025039,ENSSSCG00000025994,ENSSSCG00000029264,ENSSSCG00000002901,ENSSSCG00000016608,ENSSSCG00000014013,ENSSSCG00000008969,ENSSSCG00000007189,ENSSSCG00000009802,ENSSSCG00000010926,ENSSSCG00000021529,ENSSSCG00000015351,ENSSSCG00000005277,ENSSSCG00000021075,ENSSSCG00000012532,ENSSSCG00000003679,ENSSSCG00000009806,ENSSSCG00000022559,ENSSSCG00000021332,…
GO:0046982	protein heterodimerization activity	molecular_function	4.625e-06	0.0018778	28	1505	65	4730	ENSSSCG00000016440,ENSSSCG00000016738,ENSSSCG00000016639,ENSSSCG00000026930,ENSSSCG00000020971,ENSSSCG00000010647,ENSSSCG00000001032,ENSSSCG00000017817,ENSSSCG00000007229,ENSSSCG00000027435,ENSSSCG00000000029,ENSSSCG00000021860,ENSSSCG00000004952,ENSSSCG00000007189,ENSSSCG00000022049,ENSSSCG00000026668,ENSSSCG00000022537,ENSSSCG00000023360,ENSSSCG00000021101,ENSSSCG00000026572,ENSSSCG00000025957,…
GO:0003676	nucleic acid binding	molecular_function	9.3357e-06	0.003664	189	1505	734	4730	ENSSSCG00000004700,ENSSSCG00000000199,ENSSSCG00000004709,ENSSSCG00000020933,ENSSSCG00000017822,ENSSSCG00000010416,ENSSSCG00000021674,ENSSSCG00000009420,ENSSSCG00000020991,ENSSSCG00000005701,ENSSSCG00000020878,ENSSSCG00000024113,ENSSSCG00000029773,ENSSSCG00000023083,ENSSSCG00000010928,ENSSSCG00000007970,ENSSSCG00000024592,ENSSSCG00000026141,ENSSSCG00000026045,ENSSSCG00000015065,ENSSSCG00000001156,…
GO:0005488	binding	molecular_function	1.7613e-05	0.0066894	690	1505	3266	4730	ENSSSCG00000008968,ENSSSCG00000024174,ENSSSCG00000008736,ENSSSCG00000026320,ENSSSCG00000024897,ENSSSCG00000027140,ENSSSCG00000024766,ENSSSCG00000010098,ENSSSCG00000011810,ENSSSCG00000012071,ENSSSCG00000009995,ENSSSCG00000017140,ENSSSCG00000017755,ENSSSCG00000016743,ENSSSCG00000005723,ENSSSCG00000007188,ENSSSCG00000022945,ENSSSCG00000000203,ENSSSCG00000027958,ENSSSCG00000011420,ENSSSCG00000013147,…
GO:0097159	organic cyclic compound binding	molecular_function	4.5564e-05	0.015394	289	1505	1217	4730	ENSSSCG00000012541,ENSSSCG00000016639,ENSSSCG00000005703,ENSSSCG00000015390,ENSSSCG00000002896,ENSSSCG00000001372,ENSSSCG00000022145,ENSSSCG00000008970,ENSSSCG00000017732,ENSSSCG00000015984,ENSSSCG00000003322,ENSSSCG00000010096,ENSSSCG00000001092,ENSSSCG00000021128,ENSSSCG00000026644,ENSSSCG00000030011,ENSSSCG00000002902,ENSSSCG00000026141,ENSSSCG00000024592,ENSSSCG00000017279,ENSSSCG00000007970,…
GO:1901363	heterocyclic compound binding	molecular_function	4.5761e-05	0.015394	286	1505	1203	4730	ENSSSCG00000011827,ENSSSCG00000000376,ENSSSCG00000010112,ENSSSCG00000009310,ENSSSCG00000011422,ENSSSCG00000009882,ENSSSCG00000015983,ENSSSCG00000000083,ENSSSCG00000022063,ENSSSCG00000000031,ENSSSCG00000029624,ENSSSCG00000029805,ENSSSCG00000011550,ENSSSCG00000016452,ENSSSCG00000024828,ENSSSCG00000012084,ENSSSCG00000005683,ENSSSCG00000010457,ENSSSCG00000027196,ENSSSCG00000008968,ENSSSCG00000012083,…
GO:0048038	quinone binding	molecular_function	0.00048935	0.076821	5	1505	5	4730	ENSSSCG00000008877,ENSSSCG00000008586,ENSSSCG00000009045,ENSSSCG00000016442,ENSSSCG00000010832
GO:0046983	protein dimerization activity	molecular_function	0.0014003	0.1505	51	1505	178	4730	ENSSSCG00000017755,ENSSSCG00000016738,ENSSSCG00000016440,ENSSSCG00000008586,ENSSSCG00000016639,ENSSSCG00000023289,ENSSSCG00000007188,ENSSSCG00000002455,ENSSSCG00000020971,ENSSSCG00000007229,ENSSSCG00000027435,ENSSSCG00000007189,ENSSSCG00000004952,ENSSSCG00000008969,ENSSSCG00000022049,ENSSSCG00000022867,ENSSSCG00000010457,ENSSSCG00000022537,ENSSSCG00000026668,ENSSSCG00000024897,ENSSSCG00000001177,…
GO:0046872	metal ion binding	molecular_function	0.0027693	0.25985	158	1505	642	4730	ENSSSCG00000005264,ENSSSCG00000029919,ENSSSCG00000004952,ENSSSCG00000030411,ENSSSCG00000008893,ENSSSCG00000011825,ENSSSCG00000022223,ENSSSCG00000021569,ENSSSCG00000000297,ENSSSCG00000030259,ENSSSCG00000002326,ENSSSCG00000022668,ENSSSCG00000012931,ENSSSCG00000023630,ENSSSCG00000005893,ENSSSCG00000015336,ENSSSCG00000024279,ENSSSCG00000027178,ENSSSCG00000021139,ENSSSCG00000027567,ENSSSCG00000025719,…
GO:0046703	natural killer cell lectin-like receptor binding	molecular_function	0.0032659	0.29353	4	1505	5	4730	ENSSSCG00000028948,ENSSSCG00000004098,ENSSSCG00000004096,ENSSSCG00000026042
GO:0000786	nucleosome	cellular_component	5.2048e-14	3.2439e-10	20	1505	23	4730	ENSSSCG00000022049,ENSSSCG00000026668,ENSSSCG00000022537,ENSSSCG00000025957,ENSSSCG00000021101,ENSSSCG00000026572,ENSSSCG00000001177,ENSSSCG00000029773,ENSSSCG00000030071,ENSSSCG00000023360,ENSSSCG00000030023,ENSSSCG00000024918,ENSSSCG00000020991,ENSSSCG00000016738,ENSSSCG00000016440,ENSSSCG00000020971,ENSSSCG00000026930,ENSSSCG00000001032,ENSSSCG00000021860,ENSSSCG00000027435
GO:0043226	organelle	cellular_component	5.5103e-14	3.2439e-10	502	1505	2043	4730	ENSSSCG00000026962,ENSSSCG00000000038,ENSSSCG00000023738,ENSSSCG00000016441,ENSSSCG00000004706,ENSSSCG00000021292,ENSSSCG00000028266,ENSSSCG00000010925,ENSSSCG00000007975,ENSSSCG00000006127,ENSSSCG00000009061,ENSSSCG00000012452,ENSSSCG00000023583,ENSSSCG00000027745,ENSSSCG00000015527,ENSSSCG00000026389,ENSSSCG00000016824,ENSSSCG00000023360,ENSSSCG00000016871,ENSSSCG00000008771,ENSSSCG00000010248,…
GO:0044815	DNA packaging complex	cellular_component	3.9076e-13	1.5336e-09	20	1505	24	4730	ENSSSCG00000020991,ENSSSCG00000030023,ENSSSCG00000024918,ENSSSCG00000023360,ENSSSCG00000029773,ENSSSCG00000030071,ENSSSCG00000001177,ENSSSCG00000025957,ENSSSCG00000021101,ENSSSCG00000026572,ENSSSCG00000022537,ENSSSCG00000026668,ENSSSCG00000022049,ENSSSCG00000027435,ENSSSCG00000021860,ENSSSCG00000001032,ENSSSCG00000026930,ENSSSCG00000020971,ENSSSCG00000016738,ENSSSCG00000016440
GO:0005622	intracellular	cellular_component	3.9917e-12	1.175e-08	559	1505	2373	4730	ENSSSCG00000010113,ENSSSCG00000016738,ENSSSCG00000027774,ENSSSCG00000020746,ENSSSCG00000020701,ENSSSCG00000023326,ENSSSCG00000004951,ENSSSCG00000010469,ENSSSCG00000016520,ENSSSCG00000011562,ENSSSCG00000009346,ENSSSCG00000023846,ENSSSCG00000016646,ENSSSCG00000029348,ENSSSCG00000021821,ENSSSCG00000010843,ENSSSCG00000005287,ENSSSCG00000015379,ENSSSCG00000013424,ENSSSCG00000010248,ENSSSCG00000022041,…
GO:0043227	membrane-bounded organelle	cellular_component	7.3238e-12	1.7246e-08	451	1505	1832	4730	ENSSSCG00000017280,ENSSSCG00000023341,ENSSSCG00000030023,ENSSSCG00000016419,ENSSSCG00000015336,ENSSSCG00000001177,ENSSSCG00000015997,ENSSSCG00000004948,ENSSSCG00000026078,ENSSSCG00000005276,ENSSSCG00000023630,ENSSSCG00000030396,ENSSSCG00000025484,ENSSSCG00000022537,ENSSSCG00000025217,ENSSSCG00000008950,ENSSSCG00000025719,ENSSSCG00000027676,ENSSSCG00000009532,ENSSSCG00000027178,ENSSSCG00000001471,…
GO:0044422	organelle part	cellular_component	9.1669e-12	1.7989e-08	300	1505	1113	4730	ENSSSCG00000016542,ENSSSCG00000009310,ENSSSCG00000011171,ENSSSCG00000011548,ENSSSCG00000011827,ENSSSCG00000000195,ENSSSCG00000000083,ENSSSCG00000006108,ENSSSCG00000008690,ENSSSCG00000011776,ENSSSCG00000016611,ENSSSCG00000006730,ENSSSCG00000025938,ENSSSCG00000000430,ENSSSCG00000012084,ENSSSCG00000007187,ENSSSCG00000029624,ENSSSCG00000010844,ENSSSCG00000016452,ENSSSCG00000008968,ENSSSCG00000028126,…
GO:0044446	intracellular organelle part	cellular_component	1.4701e-11	2.4726e-08	294	1505	1089	4730	ENSSSCG00000028124,ENSSSCG00000001156,ENSSSCG00000004969,ENSSSCG00000016869,ENSSSCG00000027348,ENSSSCG00000021670,ENSSSCG00000024113,ENSSSCG00000007850,ENSSSCG00000020991,ENSSSCG00000009420,ENSSSCG00000008878,ENSSSCG00000016857,ENSSSCG00000012077,ENSSSCG00000007205,ENSSSCG00000002822,ENSSSCG00000015351,ENSSSCG00000029696,ENSSSCG00000023133,ENSSSCG00000005277,ENSSSCG00000016605,ENSSSCG00000010926,…
GO:0044424	intracellular part	cellular_component	2.0522e-11	2.8807e-08	524	1505	2206	4730	ENSSSCG00000006897,ENSSSCG00000029983,ENSSSCG00000020971,ENSSSCG00000005821,ENSSSCG00000024275,ENSSSCG00000008845,ENSSSCG00000007851,ENSSSCG00000007208,ENSSSCG00000023793,ENSSSCG00000023731,ENSSSCG00000012076,ENSSSCG00000023374,ENSSSCG00000010834,ENSSSCG00000021464,ENSSSCG00000025821,ENSSSCG00000011775,ENSSSCG00000009531,ENSSSCG00000023748,ENSSSCG00000021860,ENSSSCG00000022187,ENSSSCG00000007968,…
GO:0043229	intracellular organelle	cellular_component	2.202e-11	2.8807e-08	457	1505	1871	4730	ENSSSCG00000027718,ENSSSCG00000026668,ENSSSCG00000004569,ENSSSCG00000005704,ENSSSCG00000010934,ENSSSCG00000016607,ENSSSCG00000027557,ENSSSCG00000022867,ENSSSCG00000028310,ENSSSCG00000003986,ENSSSCG00000012531,ENSSSCG00000005702,ENSSSCG00000005829,ENSSSCG00000020985,ENSSSCG00000016440,ENSSSCG00000016125,ENSSSCG00000016751,ENSSSCG00000016067,ENSSSCG00000023903,ENSSSCG00000008061,ENSSSCG00000027435,…
GO:0032993	protein-DNA complex	cellular_component	2.8243e-11	3.3253e-08	22	1505	31	4730	ENSSSCG00000016440,ENSSSCG00000016738,ENSSSCG00000020971,ENSSSCG00000026930,ENSSSCG00000001032,ENSSSCG00000021860,ENSSSCG00000027435,ENSSSCG00000021920,ENSSSCG00000015987,ENSSSCG00000022049,ENSSSCG00000026668,ENSSSCG00000022537,ENSSSCG00000026572,ENSSSCG00000021101,ENSSSCG00000025957,ENSSSCG00000001177,ENSSSCG00000029773,ENSSSCG00000030071,ENSSSCG00000023360,ENSSSCG00000024918,ENSSSCG00000030023,…

## Sheet: co-expression
Table S5. GO analysis for target genes of whole transcriptome-wide lncRNAs
GO_accession	Description	Term_type	Over_represented_pValue	Corrected_pValue	DEG_item	DEG_list	Bg_item	Bg_list	Gene_names
GO:0044237	cellular metabolic process	biological_process	8.4316e-22	6.6182e-19	1025	13084	1802	4730	ENSSSCG00000021423,ENSSSCG00000012534,ENSSSCG00000016466,ENSSSCG00000030525,ENSSSCG00000026045,ENSSSCG00000025053,ENSSSCG00000009794,ENSSSCG00000000685,ENSSSCG00000028656,ENSSSCG00000027697,ENSSSCG00000006182,ENSSSCG00000021144,ENSSSCG00000016751,ENSSSCG00000000365,ENSSSCG00000017258,ENSSSCG00000012745,ENSSSCG00000023719,ENSSSCG00000028978,ENSSSCG00000016566,ENSSSCG00000003802,ENSSSCG00000001197,…
GO:0008152	metabolic process	biological_process	9.5783e-21	6.6338e-18	1259	13084	2295	4730	ENSSSCG00000016096,ENSSSCG00000000433,ENSSSCG00000024445,ENSSSCG00000016558,ENSSSCG00000008586,ENSSSCG00000013072,ENSSSCG00000010188,ENSSSCG00000005672,ENSSSCG00000023648,ENSSSCG00000022419,ENSSSCG00000012743,ENSSSCG00000008736,ENSSSCG00000000037,ENSSSCG00000027567,ENSSSCG00000020912,ENSSSCG00000025095,ENSSSCG00000026781,ENSSSCG00000028400,ENSSSCG00000021684,ENSSSCG00000015268,ENSSSCG00000022975,…
GO:0006996	organelle organization	biological_process	1.1107e-20	7.265e-18	401	13084	610	4730	ENSSSCG00000021042,ENSSSCG00000026781,ENSSSCG00000021684,ENSSSCG00000004705,ENSSSCG00000025719,ENSSSCG00000004718,ENSSSCG00000028798,ENSSSCG00000024626,ENSSSCG00000008685,ENSSSCG00000028223,ENSSSCG00000028118,ENSSSCG00000011558,ENSSSCG00000015070,ENSSSCG00000004571,ENSSSCG00000002715,ENSSSCG00000025095,ENSSSCG00000027419,ENSSSCG00000017265,ENSSSCG00000026475,ENSSSCG00000021346,ENSSSCG00000004720,…
GO:0044260	cellular macromolecule metabolic process	biological_process	9.7399e-20	5.4608e-17	844	13084	1456	4730	ENSSSCG00000007188,ENSSSCG00000011270,ENSSSCG00000011519,ENSSSCG00000022168,ENSSSCG00000028737,ENSSSCG00000009349,ENSSSCG00000024596,ENSSSCG00000008867,ENSSSCG00000004306,ENSSSCG00000020878,ENSSSCG00000022753,ENSSSCG00000011813,ENSSSCG00000027663,ENSSSCG00000027526,ENSSSCG00000005773,ENSSSCG00000004558,ENSSSCG00000028640,ENSSSCG00000005706,ENSSSCG00000014435,ENSSSCG00000000278,ENSSSCG00000004700,…
GO:0071704	organic substance metabolic process	biological_process	6.2241e-19	3.331e-16	1059	13084	1899	4730	ENSSSCG00000023016,ENSSSCG00000002941,ENSSSCG00000009094,ENSSSCG00000017832,ENSSSCG00000028798,ENSSSCG00000001476,ENSSSCG00000015486,ENSSSCG00000024753,ENSSSCG00000008881,ENSSSCG00000025298,ENSSSCG00000011951,ENSSSCG00000004713,ENSSSCG00000000754,ENSSSCG00000024626,ENSSSCG00000008850,ENSSSCG00000023315,ENSSSCG00000002328,ENSSSCG00000029174,ENSSSCG00000001701,ENSSSCG00000022860,ENSSSCG00000013043,…
GO:0044238	primary metabolic process	biological_process	2.8891e-17	1.3606e-14	1024	13084	1843	4730	ENSSSCG00000027543,ENSSSCG00000005701,ENSSSCG00000015072,ENSSSCG00000008690,ENSSSCG00000021708,ENSSSCG00000026755,ENSSSCG00000021020,ENSSSCG00000001027,ENSSSCG00000024070,ENSSSCG00000009458,ENSSSCG00000022421,ENSSSCG00000025637,ENSSSCG00000027411,ENSSSCG00000004077,ENSSSCG00000022955,ENSSSCG00000002299,ENSSSCG00000028219,ENSSSCG00000008504,ENSSSCG00000020879,ENSSSCG00000011414,ENSSSCG00000009084,…
GO:0043170	macromolecule metabolic process	biological_process	7.0791e-16	3.2058e-13	901	13084	1607	4730	ENSSSCG00000014416,ENSSSCG00000016865,ENSSSCG00000017818,ENSSSCG00000015050,ENSSSCG00000004711,ENSSSCG00000004709,ENSSSCG00000025902,ENSSSCG00000006277,ENSSSCG00000001912,ENSSSCG00000004576,ENSSSCG00000012732,ENSSSCG00000007174,ENSSSCG00000025883,ENSSSCG00000006115,ENSSSCG00000005759,ENSSSCG00000008684,ENSSSCG00000026702,ENSSSCG00000012931,ENSSSCG00000021433,ENSSSCG00000017817,ENSSSCG00000024427,…
GO:0090304	nucleic acid metabolic process	biological_process	2.9219e-13	1.2742e-10	489	13084	818	4730	ENSSSCG00000004104,ENSSSCG00000010653,ENSSSCG00000016420,ENSSSCG00000023801,ENSSSCG00000011548,ENSSSCG00000025418,ENSSSCG00000024033,ENSSSCG00000022409,ENSSSCG00000027648,ENSSSCG00000024912,ENSSSCG00000029493,ENSSSCG00000016892,ENSSSCG00000029137,ENSSSCG00000002305,ENSSSCG00000005680,ENSSSCG00000021920,ENSSSCG00000003558,ENSSSCG00000004548,ENSSSCG00000004311,ENSSSCG00000016528,ENSSSCG00000004972,…
GO:1902589	single-organism organelle organization	biological_process	8.8141e-13	3.7063e-10	284	13084	438	4730	ENSSSCG00000014934,ENSSSCG00000003693,ENSSSCG00000030252,ENSSSCG00000011538,ENSSSCG00000016061,ENSSSCG00000026849,ENSSSCG00000025870,ENSSSCG00000023719,ENSSSCG00000007818,ENSSSCG00000022283,ENSSSCG00000024621,ENSSSCG00000000288,ENSSSCG00000022538,ENSSSCG00000027697,ENSSSCG00000009806,ENSSSCG00000010984,ENSSSCG00000008675,ENSSSCG00000024754,ENSSSCG00000015482,ENSSSCG00000029375,ENSSSCG00000009071,…
GO:1901360	organic cyclic compound metabolic process	biological_process	9.2513e-13	3.756e-10	563	13084	966	4730	ENSSSCG00000012083,ENSSSCG00000015372,ENSSSCG00000006496,ENSSSCG00000010107,ENSSSCG00000029773,ENSSSCG00000006214,ENSSSCG00000016857,ENSSSCG00000025374,ENSSSCG00000026830,ENSSSCG00000010437,ENSSSCG00000016738,ENSSSCG00000022168,ENSSSCG00000009349,ENSSSCG00000024596,ENSSSCG00000004306,ENSSSCG00000020878,ENSSSCG00000022753,ENSSSCG00000005773,ENSSSCG00000028640,ENSSSCG00000005706,ENSSSCG00000000278,…
GO:0005515	protein binding	molecular_function	2.9809e-21	2.1936e-18	1283	13084	2332	4730	ENSSSCG00000028964,ENSSSCG00000004082,ENSSSCG00000016090,ENSSSCG00000009334,ENSSSCG00000008965,ENSSSCG00000012744,ENSSSCG00000025124,ENSSSCG00000023983,ENSSSCG00000005302,ENSSSCG00000023526,ENSSSCG00000004719,ENSSSCG00000023374,ENSSSCG00000027757,ENSSSCG00000025717,ENSSSCG00000004332,ENSSSCG00000004550,ENSSSCG00000010930,ENSSSCG00000028432,ENSSSCG00000025018,ENSSSCG00000010580,ENSSSCG00000028118,…
GO:0005488	binding	molecular_function	1.9894e-11	5.8559e-09	1659	13084	3266	4730	ENSSSCG00000026336,ENSSSCG00000024174,ENSSSCG00000007237,ENSSSCG00000015068,ENSSSCG00000028283,ENSSSCG00000001910,ENSSSCG00000022223,ENSSSCG00000001920,ENSSSCG00000008682,ENSSSCG00000028981,ENSSSCG00000020701,ENSSSCG00000006280,ENSSSCG00000006286,ENSSSCG00000027450,ENSSSCG00000000755,ENSSSCG00000024411,ENSSSCG00000010454,ENSSSCG00000023925,ENSSSCG00000004081,ENSSSCG00000009018,ENSSSCG00000030255,…
GO:1901363	heterocyclic compound binding	molecular_function	1.7927e-10	4.3076e-08	672	13084	1203	4730	ENSSSCG00000025192,ENSSSCG00000000274,ENSSSCG00000015389,ENSSSCG00000022630,ENSSSCG00000022683,ENSSSCG00000016590,ENSSSCG00000020754,ENSSSCG00000024152,ENSSSCG00000026022,ENSSSCG00000010597,ENSSSCG00000011827,ENSSSCG00000028638,ENSSSCG00000025918,ENSSSCG00000011936,ENSSSCG00000022182,ENSSSCG00000015071,ENSSSCG00000008968,ENSSSCG00000023515,ENSSSCG00000004979,ENSSSCG00000029920,ENSSSCG00000017665,…
GO:0097159	organic cyclic compound binding	molecular_function	6.4114e-10	1.3015e-07	676	13084	1217	4730	ENSSSCG00000004106,ENSSSCG00000016528,ENSSSCG00000004548,ENSSSCG00000010941,ENSSSCG00000016929,ENSSSCG00000005776,ENSSSCG00000016922,ENSSSCG00000021821,ENSSSCG00000024838,ENSSSCG00000026658,ENSSSCG00000011821,ENSSSCG00000030548,ENSSSCG00000027648,ENSSSCG00000010653,ENSSSCG00000027668,ENSSSCG00000021920,ENSSSCG00000002305,ENSSSCG00000005680,ENSSSCG00000011535,ENSSSCG00000010002,ENSSSCG00000012938,…
GO:0016740	transferase activity	molecular_function	3.2234e-09	6.1213e-07	299	13084	496	4730	ENSSSCG00000015483,ENSSSCG00000005252,ENSSSCG00000024996,ENSSSCG00000023576,ENSSSCG00000014010,ENSSSCG00000009076,ENSSSCG00000008647,ENSSSCG00000030293,ENSSSCG00000002716,ENSSSCG00000022486,ENSSSCG00000016518,ENSSSCG00000005303,ENSSSCG00000030045,ENSSSCG00000024393,ENSSSCG00000026962,ENSSSCG00000023283,ENSSSCG00000008792,ENSSSCG00000005671,ENSSSCG00000016925,ENSSSCG00000021712,ENSSSCG00000001918,…
GO:0004674	protein serine/threonine kinase activity	molecular_function	1.6769e-08	2.6681e-06	68	13084	88	4730	ENSSSCG00000004718,ENSSSCG00000024701,ENSSSCG00000024184,ENSSSCG00000011415,ENSSSCG00000024356,ENSSSCG00000010164,ENSSSCG00000021684,ENSSSCG00000012083,ENSSSCG00000022538,ENSSSCG00000007203,ENSSSCG00000028432,ENSSSCG00000028806,ENSSSCG00000016858,ENSSSCG00000011226,ENSSSCG00000011550,ENSSSCG00000002628,ENSSSCG00000009023,ENSSSCG00000016873,ENSSSCG00000021433,ENSSSCG00000015318,ENSSSCG00000000958,…
GO:0003676	nucleic acid binding	molecular_function	2.8232e-08	4.2599e-06	419	13084	734	4730	ENSSSCG00000000364,ENSSSCG00000002941,ENSSSCG00000024753,ENSSSCG00000028118,ENSSSCG00000008736,ENSSSCG00000008850,ENSSSCG00000000754,ENSSSCG00000025018,ENSSSCG00000010580,ENSSSCG00000021564,ENSSSCG00000001701,ENSSSCG00000015987,ENSSSCG00000005763,ENSSSCG00000026475,ENSSSCG00000011264,ENSSSCG00000023173,ENSSSCG00000010556,ENSSSCG00000000472,ENSSSCG00000030268,ENSSSCG00000023304,ENSSSCG00000016520,…
GO:0003824	catalytic activity	molecular_function	2.8583e-08	4.2599e-06	711	13084	1317	4730	ENSSSCG00000008867,ENSSSCG00000020686,ENSSSCG00000024596,ENSSSCG00000002907,ENSSSCG00000025942,ENSSSCG00000028737,ENSSSCG00000009349,ENSSSCG00000027659,ENSSSCG00000007188,ENSSSCG00000011519,ENSSSCG00000028996,ENSSSCG00000004704,ENSSSCG00000002437,ENSSSCG00000002355,ENSSSCG00000016436,ENSSSCG00000004700,ENSSSCG00000004558,ENSSSCG00000027526,ENSSSCG00000027663,ENSSSCG00000014435,ENSSSCG00000005706,…
GO:0019899	enzyme binding	molecular_function	3.5667e-08	5.1844e-06	152	13084	229	4730	ENSSSCG00000008061,ENSSSCG00000023283,ENSSSCG00000015530,ENSSSCG00000028701,ENSSSCG00000027140,ENSSSCG00000000058,ENSSSCG00000030658,ENSSSCG00000016570,ENSSSCG00000026201,ENSSSCG00000016545,ENSSSCG00000000528,ENSSSCG00000006891,ENSSSCG00000016626,ENSSSCG00000006490,ENSSSCG00000024996,ENSSSCG00000002837,ENSSSCG00000007247,ENSSSCG00000007205,ENSSSCG00000010465,ENSSSCG00000016235,ENSSSCG00000016846,…
GO:0000166	nucleotide binding	molecular_function	3.8379e-06	0.00035863	317	13084	549	4730	ENSSSCG00000016742,ENSSSCG00000017665,ENSSSCG00000022867,ENSSSCG00000000475,ENSSSCG00000009931,ENSSSCG00000016794,ENSSSCG00000024598,ENSSSCG00000017146,ENSSSCG00000021591,ENSSSCG00000025964,ENSSSCG00000030569,ENSSSCG00000009047,ENSSSCG00000004921,ENSSSCG00000004305,ENSSSCG00000030035,ENSSSCG00000028133,ENSSSCG00000029575,ENSSSCG00000005285,ENSSSCG00000025003,ENSSSCG00000027786,ENSSSCG00000016451,…
GO:0044446	intracellular organelle part	cellular_component	2.8417e-34	2.8608e-30	702	13084	1089	4730	ENSSSCG00000009036,ENSSSCG00000022947,ENSSSCG00000016092,ENSSSCG00000017817,ENSSSCG00000021670,ENSSSCG00000029617,ENSSSCG00000021128,ENSSSCG00000008839,ENSSSCG00000009880,ENSSSCG00000012084,ENSSSCG00000007167,ENSSSCG00000021381,ENSSSCG00000026631,ENSSSCG00000016872,ENSSSCG00000025902,ENSSSCG00000005739,ENSSSCG00000014416,ENSSSCG00000015050,ENSSSCG00000015325,ENSSSCG00000016869,ENSSSCG00000007174,…
GO:0005622	intracellular	cellular_component	5.906e-34	2.8608e-30	1346	13084	2373	4730	ENSSSCG00000011775,ENSSSCG00000022668,ENSSSCG00000027745,ENSSSCG00000006219,ENSSSCG00000001940,ENSSSCG00000029880,ENSSSCG00000013065,ENSSSCG00000021150,ENSSSCG00000016824,ENSSSCG00000000083,ENSSSCG00000029643,ENSSSCG00000014082,ENSSSCG00000016427,ENSSSCG00000024541,ENSSSCG00000002378,ENSSSCG00000023279,ENSSSCG00000016553,ENSSSCG00000001710,ENSSSCG00000002050,ENSSSCG00000010534,ENSSSCG00000009096,…
GO:0043226	organelle	cellular_component	7.2894e-34	2.8608e-30	1185	13084	2043	4730	ENSSSCG00000016096,ENSSSCG00000008771,ENSSSCG00000008586,ENSSSCG00000024445,ENSSSCG00000000433,ENSSSCG00000009465,ENSSSCG00000021756,ENSSSCG00000005672,ENSSSCG00000021986,ENSSSCG00000016593,ENSSSCG00000007853,ENSSSCG00000027248,ENSSSCG00000010188,ENSSSCG00000004726,ENSSSCG00000025095,ENSSSCG00000000037,ENSSSCG00000008736,ENSSSCG00000022419,ENSSSCG00000010462,ENSSSCG00000028925,ENSSSCG00000022975,…
GO:0044422	organelle part	cellular_component	1.1486e-33	3.3808e-30	713	13084	1113	4730	ENSSSCG00000023157,ENSSSCG00000004570,ENSSSCG00000021756,ENSSSCG00000011411,ENSSSCG00000010188,ENSSSCG00000027248,ENSSSCG00000007853,ENSSSCG00000009420,ENSSSCG00000005672,ENSSSCG00000021986,ENSSSCG00000005729,ENSSSCG00000013332,ENSSSCG00000021814,ENSSSCG00000016096,ENSSSCG00000010185,ENSSSCG00000008771,ENSSSCG00000024445,ENSSSCG00000002904,ENSSSCG00000003795,ENSSSCG00000024020,ENSSSCG00000000433,…
GO:0044424	intracellular part	cellular_component	2.2893e-33	5.3908e-30	1266	13084	2206	4730	ENSSSCG00000021220,ENSSSCG00000022507,ENSSSCG00000027931,ENSSSCG00000016464,ENSSSCG00000010834,ENSSSCG00000017826,ENSSSCG00000023658,ENSSSCG00000017140,ENSSSCG00000001702,ENSSSCG00000023699,ENSSSCG00000016452,ENSSSCG00000007173,ENSSSCG00000030682,ENSSSCG00000002896,ENSSSCG00000028821,ENSSSCG00000003558,ENSSSCG00000005271,ENSSSCG00000004969,ENSSSCG00000022734,ENSSSCG00000026930,ENSSSCG00000011548,…
GO:0043227	membrane-bounded organelle	cellular_component	4.5899e-33	9.0069e-30	1080	13084	1832	4730	ENSSSCG00000016750,ENSSSCG00000023472,ENSSSCG00000024295,ENSSSCG00000014303,ENSSSCG00000025301,ENSSSCG00000029301,ENSSSCG00000000620,ENSSSCG00000024841,ENSSSCG00000011776,ENSSSCG00000021556,ENSSSCG00000014003,ENSSSCG00000000363,ENSSSCG00000005277,ENSSSCG00000023304,ENSSSCG00000009075,ENSSSCG00000024897,ENSSSCG00000000472,ENSSSCG00000007845,ENSSSCG00000013043,ENSSSCG00000004708,ENSSSCG00000014406,…
GO:0043229	intracellular organelle	cellular_component	3.4739e-30	5.8432e-27	1091	13084	1871	4730	ENSSSCG00000016653,ENSSSCG00000016156,ENSSSCG00000005303,ENSSSCG00000025087,ENSSSCG00000027350,ENSSSCG00000000477,ENSSSCG00000002837,ENSSSCG00000014010,ENSSSCG00000010551,ENSSSCG00000015527,ENSSSCG00000021712,ENSSSCG00000022385,ENSSSCG00000023958,ENSSSCG00000002841,ENSSSCG00000028124,ENSSSCG00000024393,ENSSSCG00000008061,ENSSSCG00000016542,ENSSSCG00000017260,ENSSSCG00000000939,ENSSSCG00000023133,…
GO:0043231	intracellular membrane-bounded organelle	cellular_component	5.1734e-30	7.6139e-27	981	13084	1650	4730	ENSSSCG00000010931,ENSSSCG00000009466,ENSSSCG00000007968,ENSSSCG00000029493,ENSSSCG00000021920,ENSSSCG00000005680,ENSSSCG00000002305,ENSSSCG00000024033,ENSSSCG00000027648,ENSSSCG00000029754,ENSSSCG00000016414,ENSSSCG00000024912,ENSSSCG00000016863,ENSSSCG00000026078,ENSSSCG00000009532,ENSSSCG00000010995,ENSSSCG00000025418,ENSSSCG00000026658,ENSSSCG00000011821,ENSSSCG00000006799,ENSSSCG00000008966,…
GO:0044428	nuclear part	cellular_component	5.5985e-27	7.3241e-24	402	13084	578	4730	ENSSSCG00000021920,ENSSSCG00000004969,ENSSSCG00000028310,ENSSSCG00000026930,ENSSSCG00000024912,ENSSSCG00000027308,ENSSSCG00000011548,ENSSSCG00000025418,ENSSSCG00000021821,ENSSSCG00000016922,ENSSSCG00000017826,ENSSSCG00000025218,ENSSSCG00000022507,ENSSSCG00000010599,ENSSSCG00000025906,ENSSSCG00000023658,ENSSSCG00000016452,ENSSSCG00000020794,ENSSSCG00000004548,ENSSSCG00000030682,ENSSSCG00000010844,…
GO:0031974	membrane-enclosed lumen	cellular_component	2.8377e-26	3.3411e-23	369	13084	524	4730	ENSSSCG00000027115,ENSSSCG00000026849,ENSSSCG00000029848,ENSSSCG00000015056,ENSSSCG00000010470,ENSSSCG00000003964,ENSSSCG00000026362,ENSSSCG00000010548,ENSSSCG00000016062,ENSSSCG00000010911,ENSSSCG00000016611,ENSSSCG00000027971,ENSSSCG00000000288,ENSSSCG00000027681,ENSSSCG00000015378,ENSSSCG00000011420,ENSSSCG00000024621,ENSSSCG00000021144,ENSSSCG00000023793,ENSSSCG00000028978,ENSSSCG00000023229,…
