# Supplementary material for: Comprehensive Genomic Characterization Analysis of lncRNAs in Cells With Porcine Delta Coronavirus Infection
Source: Front Microbiol. 2020 Jan 28;10:3036. doi: 10.3389/fmicb.2019.03036 (PMC6999024; doi:10.3389/fmicb.2019.03036)
Supplement: Supplementary file 7 [file Table_7.xlsx]

## Sheet: Sheet1
Table S7. DE lncRNAs
transcript_id	gene_id	gene_name	Status	gene_location	PS_FPKM	ST_FPKM	log2(foldchange)	pvalue	qvalue
LNC_000519	XLOC_025379	-	Novel_lncRNA	chr14:813524-815221	0.632021	0	inf	5e-05	0.000155633
LNC_000520	XLOC_025380	-	Novel_lncRNA	chr14:815702-817199	0.664909	0	inf	5e-05	0.000155633
LNC_001030	XLOC_058627	-	Novel_lncRNA	chr7:113830361-113831532	0.696673	0	inf	5e-05	0.000155633
LNC_001155	XLOC_066215	-	Novel_lncRNA	chr9:45945041-45950007	1.15413	0	inf	5e-05	0.000155633
LNC_000604	XLOC_029452	-	Novel_lncRNA	chr15:52793841-52797011	1.18014	0	inf	0.00485	0.0107445
LNC_000384	XLOC_017942	-	Novel_lncRNA	chr12:13737951-13742052	1.31737	0	inf	5e-05	0.000155633
LNC_000737	XLOC_038865	-	Novel_lncRNA	chr2:101245919-101248963	1.34642	0	inf	5e-05	0.000155633
LNC_000553	XLOC_027550	-	Novel_lncRNA	chr14:39208929-39216190	1.39484	0	inf	5e-05	0.000155633
LNC_000819	XLOC_044015	-	Novel_lncRNA	chr3:139267006-139282559	1.44203	0	inf	5e-05	0.000155633
LNC_000781	XLOC_041789	-	Novel_lncRNA	chr2:124508119-124510327	1.70096	0	inf	5e-05	0.000155633
LNC_000707	XLOC_035736	-	Novel_lncRNA	chr18:6871785-6872515	92.5229	0	inf	5e-05	0.000155633
LNC_000034	XLOC_001829	-	Novel_lncRNA	GL893581.2:69837-70266	686.329	0	inf	5e-05	0.000155633
LNC_000660	XLOC_032946	-	Novel_lncRNA	chr16:82588226-82593132	3.55981	0.024732	7.16928	0.01105	0.0224525
LNC_000676	XLOC_033622	-	Novel_lncRNA	chr16:68351984-68382725	0.925249	0.0338341	4.77329	0.005	0.0110347
LNC_000769	XLOC_041471	-	Novel_lncRNA	chr2:97234878-97245504	1.60352	0.0365664	5.45458	5e-05	0.000155633
LNC_000344	XLOC_016691	-	Novel_lncRNA	chr11:54828262-54835271	1.2753	0.0435616	4.87164	0.0079	0.0166785
LNC_000843	XLOC_045988	-	Novel_lncRNA	chr4:1794910-1797669	1.33558	0.0462595	4.85158	0.0214	0.0404317
LNC_000597	XLOC_029355	-	Novel_lncRNA	chr15:44818247-44863131	1.38574	0.0480706	4.84936	0.0001	0.000300888
LNC_000715	XLOC_036961	-	Novel_lncRNA	chr18:47095830-47125014	1.12164	0.0586273	4.2579	5e-05	0.000155633
LNC_000194	XLOC_009610	-	Novel_lncRNA	chr1:180509977-180541417	1.24426	0.0644269	4.27148	0.0046	0.0102514
LNC_000659	XLOC_032939	-	Novel_lncRNA	chr16:81980986-81987177	0.766392	0.0708398	3.43545	0.0003	0.000841218
LNC_000683	XLOC_034012	-	Novel_lncRNA	chr17:22548191-22592011	1.14348	0.0756532	3.91788	0.00975	0.0200837
LNC_000662	XLOC_033137	-	Novel_lncRNA	chr16:21025378-21030406	1.34497	0.0776737	4.114	0.01945	0.0372134
LNC_000684	XLOC_034015	-	Novel_lncRNA	chr17:22636018-22643521	0.959268	0.0851051	3.49462	5e-05	0.000155633
LNC_000266	XLOC_014183	-	Novel_lncRNA	chr10:8927416-8931539	2.36983	0.0858038	4.7876	0.00615	0.0133013
LNC_000279	XLOC_014277	-	Novel_lncRNA	chr10:16118156-16125326	0.789025	0.0932522	3.08086	0.0039	0.00882277
LNC_000199	XLOC_009786	-	Novel_lncRNA	chr1:201395069-201478281	1.37633	0.0961305	3.83969	0.0103	0.0210933
LNC_000247	XLOC_012810	-	Novel_lncRNA	chr1:180160384-180165651	1.3022	0.0963401	3.75667	5e-05	0.000155633
ALDBSSCT0000004428	ALDBSSCG0000002697	-	Annotated_lncRNA	chr15:44734201-44739794	1.20586	0.0963421	3.64576	0.0004	0.00109881
LNC_000269	XLOC_014221	-	Novel_lncRNA	chr10:12608296-12615129	1.39487	0.103108	3.7579	0.00025	0.000710668
LNC_000219	XLOC_011194	-	Novel_lncRNA	chr1:9989887-9994250	1.24246	0.112467	3.46563	0.00015	0.000441639
LNC_001179	XLOC_068657	-	Novel_lncRNA	chrX:49488538-49506212	0.739784	0.114313	2.69411	5e-05	0.000155633
LNC_001088	XLOC_062972	-	Novel_lncRNA	chr8:81695500-81708652	1.83654	0.120781	3.92652	5e-05	0.000155633
ALDBSSCT0000004161	ALDBSSCG0000002512	-	Annotated_lncRNA	chr15:34978573-34981686	0.623354	0.120948	2.36567	0.0014	0.00348255
LNC_001019	XLOC_057508	-	Novel_lncRNA	chr7:37248729-37252334	0.745557	0.126255	2.56198	0.0029	0.00674139
LNC_000959	XLOC_053364	-	Novel_lncRNA	chr6:63146147-63151310	1.15166	0.129906	3.14818	0.0002	0.000578608
LNC_001156	XLOC_066234	-	Novel_lncRNA	chr9:49075634-49123199	0.9544	0.146896	2.6998	5e-05	0.000155633
LNC_001038	XLOC_059392	-	Novel_lncRNA	chr7:37662985-37667079	2.03932	0.151492	3.75077	5e-05	0.000155633
ALDBSSCT0000006313	ALDBSSCG0000003858	-	Annotated_lncRNA	chr2:66208017-66209782	2.10872	0.151761	3.79649	0.00845	0.0176961
LNC_000486	XLOC_023828	-	Novel_lncRNA	chr13:75470784-75482127	1.35639	0.159728	3.08609	5e-05	0.000155633
LNC_000615	XLOC_029864	-	Novel_lncRNA	chr15:89700811-89704512	1.83047	0.16179	3.50002	0.0104	0.0212714
LNC_000467	XLOC_022815	-	Novel_lncRNA	chr13:215236808-215240998	0.876094	0.178276	2.29697	0.01125	0.0228047
LNC_000611	XLOC_029536	-	Novel_lncRNA	chr15:59651233-59709891	1.02814	0.182793	2.49176	0.0055	0.0120419
LNC_000459	XLOC_022058	-	Novel_lncRNA	chr13:140785769-140791957	4.28939	0.184024	4.54281	5e-05	0.000155633
LNC_000636	XLOC_031817	-	Novel_lncRNA	chr15:121991457-122016028	0.823498	0.184985	2.15436	5e-05	0.000155633
ALDBSSCT0000003086	ALDBSSCG0000001854	-	Annotated_lncRNA	chr13:29243499-29245708	1.14877	0.185453	2.63097	0.00025	0.000710668
LNC_000635	XLOC_031817	-	Novel_lncRNA	chr15:121991457-122016028	0.82619	0.185584	2.1544	0.0001	0.000300888
LNC_000186	XLOC_009183	-	Novel_lncRNA	chr1:140930495-140941317	3.33095	0.185974	4.16276	5e-05	0.000155633
ALDBSSCT0000000449	ALDBSSCG0000000271	-	Annotated_lncRNA	chr1:245181816-245237825	0.828192	0.189159	2.13037	0.0002	0.000578608
LNC_000625	XLOC_030971	-	Novel_lncRNA	chr15:44655925-44689032	6.10358	0.199175	4.93754	5e-05	0.000155633
LNC_000473	XLOC_023054	-	Novel_lncRNA	chr13:23768748-23770082	0.868366	0.20241	2.10102	0.0146	0.0288562
LNC_000173	XLOC_008621	-	Novel_lncRNA	chr1:81215970-81222607	1.52565	0.203504	2.90629	5e-05	0.000155633
LNC_000663	XLOC_033137	-	Novel_lncRNA	chr16:21025378-21030406	4.003	0.2047	4.2895	5e-05	0.000155633
LNC_001102	XLOC_063385	-	Novel_lncRNA	chr8:127116641-127120170	0.701435	0.206743	1.76247	0.0048	0.0106469
LNC_000280	XLOC_014283	-	Novel_lncRNA	chr10:16141735-16176340	0.970414	0.207703	2.22408	0.0114	0.0230645
LNC_000794	XLOC_042521	-	Novel_lncRNA	chr3:18104572-18110413	2.90335	0.208495	3.79963	0.00015	0.000441639
LNC_000492	XLOC_024279	-	Novel_lncRNA	chr13:112020392-112058706	1.01259	0.214928	2.23612	0.0137	0.0272694
ALDBSSCT0000009132	ALDBSSCG0000005569	-	Annotated_lncRNA	chr6:143830051-143833790	5.38139	0.216074	4.63838	0.00845	0.0176961
LNC_000462	XLOC_022397	-	Novel_lncRNA	chr13:160580062-160604965	3.16506	0.216736	3.86822	5e-05	0.000155633
LNC_000218	XLOC_011194	-	Novel_lncRNA	chr1:9989887-9994250	3.86927	0.217652	4.15196	5e-05	0.000155633
ALDBSSCT0000006653	ALDBSSCG0000004070	-	Annotated_lncRNA	chr3:40519307-40520866	0.636416	0.217877	1.54646	0.02425	0.0451841
LNC_000990	XLOC_055719	-	Novel_lncRNA	chr6:71447973-71457581	1.34686	0.217925	2.62769	5e-05	0.000155633
ALDBSSCT0000000385	ALDBSSCG0000000230	-	Annotated_lncRNA	chr1:201395069-201478281	1.39994	0.219368	2.67394	0.0005	0.00135038
LNC_000359	XLOC_017282	-	Novel_lncRNA	chr11:19445422-19505744	3.15477	0.224617	3.812	0.01005	0.0206449
LNC_000501	XLOC_024670	-	Novel_lncRNA	chr13:140593664-140623348	1.33295	0.225939	2.56062	0.02355	0.0440444
LNC_000252	XLOC_013139	-	Novel_lncRNA	chr1:216688065-216695568	1.12023	0.227396	2.30052	5e-05	0.000155633
LNC_000376	XLOC_017798	-	Novel_lncRNA	chr12:3931541-3937649	3.91255	0.227724	4.10275	5e-05	0.000155633
LNC_000294	XLOC_014862	-	Novel_lncRNA	chr10:53915449-53917084	1.16632	0.231536	2.33266	0.00385	0.00871955
LNC_000366	XLOC_017326	-	Novel_lncRNA	chr11:23176938-23180588	3.60421	0.238079	3.92017	5e-05	0.000155633
LNC_001078	XLOC_062303	-	Novel_lncRNA	chr8:17201823-17204453	0.728151	0.239505	1.60418	0.00035	0.000971111
LNC_000172	XLOC_008621	-	Novel_lncRNA	chr1:81215970-81222607	1.25502	0.242223	2.3733	5e-05	0.000155633
LNC_000195	XLOC_009644	-	Novel_lncRNA	chr1:182479869-182500854	0.857912	0.242416	1.82334	5e-05	0.000155633
ALDBSSCT0000003445	ALDBSSCG0000002076	-	Annotated_lncRNA	chr14:1033421-1035310	1.88348	0.247674	2.92689	0.0005	0.00135038
LNC_001010	XLOC_057219	-	Novel_lncRNA	chr7:22607739-22610208	0.646662	0.249704	1.37279	0.01015	0.0208169
LNC_000211	XLOC_011077	-	Novel_lncRNA	chr1:313792494-313794597	1.51096	0.250557	2.59225	0.01675	0.0326138
LNC_000844	XLOC_046007	-	Novel_lncRNA	chr4:2495158-2501536	1.32351	0.255363	2.37375	5e-05	0.000155633
LNC_000626	XLOC_030971	-	Novel_lncRNA	chr15:44655925-44689032	10.5832	0.256783	5.36509	5e-05	0.000155633
LNC_000295	XLOC_015004	-	Novel_lncRNA	chr10:70800221-70806408	1.26154	0.259791	2.27977	5e-05	0.000155633
LNC_000458	XLOC_022058	-	Novel_lncRNA	chr13:140785769-140791957	2.55791	0.262118	3.28668	5e-05	0.000155633
LNC_000387	XLOC_018107	-	Novel_lncRNA	chr12:20625341-20628168	0.618094	0.263165	1.23186	0.02485	0.0461203
ALDBSSCT0000008821	ALDBSSCG0000005388	-	Annotated_lncRNA	chr6:42424226-42509981	0.671073	0.266663	1.33145	0.02295	0.0430432
LNC_000382	XLOC_017902	-	Novel_lncRNA	chr12:8792457-8795553	1.02993	0.273014	1.9155	0.00025	0.000710668
LNC_000461	XLOC_022397	-	Novel_lncRNA	chr13:160580062-160604965	4.27235	0.276911	3.94753	5e-05	0.000155633
LNC_000315	XLOC_015951	-	Novel_lncRNA	chr10:57185720-57210418	2.32814	0.284774	3.03129	5e-05	0.000155633
LNC_000068	XLOC_003597	-	Novel_lncRNA	GL894574.1:77840-80381	2.32193	0.28496	3.02649	0.0118	0.0237854
ALDBSSCT0000006417	ALDBSSCG0000003920	-	Annotated_lncRNA	chr2:124465040-124469545	2.58844	0.290933	3.15332	0.0264	0.0486302
LNC_000870	XLOC_047481	-	Novel_lncRNA	chr4:129088712-129096890	0.853657	0.292005	1.54767	0.00465	0.0103461
LNC_000527	XLOC_026233	-	Novel_lncRNA	chr14:62312472-62332199	0.930545	0.292482	1.66973	0.0187	0.0359431
LNC_000179	XLOC_008862	-	Novel_lncRNA	chr1:103397236-103404788	1.08478	0.292568	1.89057	0.0005	0.00135038
LNC_000156	XLOC_007773	-	Novel_lncRNA	JH118943.1:3926-18754	0.793522	0.29456	1.42971	0.0084	0.0175996
LNC_000511	XLOC_025126	-	Novel_lncRNA	chr13:199064137-199074408	3.87178	0.296251	3.7081	5e-05	0.000155633
LNC_000208	XLOC_010749	-	Novel_lncRNA	chr1:293787440-293792164	0.99465	0.300598	1.72635	5e-05	0.000155633
ALDBSSCT0000002350	ALDBSSCG0000001423	-	Annotated_lncRNA	chr12:6270090-6271985	1.05377	0.309655	1.76683	0.0016	0.0039214
LNC_000696	XLOC_034690	-	Novel_lncRNA	chr17:69054821-69057976	2.13905	0.32099	2.73637	5e-05	0.000155633
LNC_000431	XLOC_020960	-	Novel_lncRNA	chr13:45336421-45440339	1.60442	0.328486	2.28815	5e-05	0.000155633
LNC_000695	XLOC_034583	-	Novel_lncRNA	chr17:57710476-57715086	1.98168	0.337725	2.5528	0.00015	0.000441639
LNC_000257	XLOC_013603	-	Novel_lncRNA	chr1:271837474-271840731	1.95416	0.341352	2.51722	5e-05	0.000155633
LNC_000806	XLOC_043616	-	Novel_lncRNA	chr3:99360598-99364586	1.90168	0.342941	2.47124	0.009	0.0186975
LNC_000524	XLOC_026189	-	Novel_lncRNA	chr14:60023145-60028550	1.55982	0.345458	2.1748	5e-05	0.000155633
ALDBSSCT0000001439	ALDBSSCG0000000871	-	Annotated_lncRNA	chr10:17585731-17614694	3.04605	0.346013	3.13804	0.02605	0.0480446
LNC_000202	XLOC_010061	-	Novel_lncRNA	chr1:223980189-223986742	1.03591	0.346329	1.58069	5e-05	0.000155633
LNC_000982	XLOC_055016	-	Novel_lncRNA	chr6:40478794-40514400	1.18951	0.346639	1.77886	5e-05	0.000155633
LNC_000033	XLOC_001828	-	Novel_lncRNA	GL893580.2:22099-24898	1.48057	0.357562	2.04989	0.00015	0.000441639
ALDBSSCT0000004465	ALDBSSCG0000002721	-	Annotated_lncRNA	chr15:62238820-62245865	0.605863	0.360529	0.748877	0.0198	0.0378105
LNC_000846	XLOC_046007	-	Novel_lncRNA	chr4:2495158-2501536	2.14724	0.361811	2.56917	5e-05	0.000155633
LNC_000554	XLOC_027596	-	Novel_lncRNA	chr14:43066648-43069225	0.945366	0.362275	1.38379	0.00025	0.000710668
LNC_000161	XLOC_008070	-	Novel_lncRNA	chr1:12184852-12199233	0.621296	0.363221	0.774432	5e-05	0.000155633
ALDBSSCT0000003003	ALDBSSCG0000001800	-	Annotated_lncRNA	chr13:208453601-208456395	1.69895	0.36858	2.20459	5e-05	0.000155633
LNC_000397	XLOC_018620	-	Novel_lncRNA	chr12:46965532-46974114	0.671568	0.371119	0.85565	0.0001	0.000300888
LNC_000251	XLOC_013021	-	Novel_lncRNA	chr1:203729680-203732497	1.71787	0.372141	2.2067	5e-05	0.000155633
LNC_000204	XLOC_010157	-	Novel_lncRNA	chr1:231293376-231518349	1.01691	0.372878	1.44741	0.0078	0.0164945
LNC_000398	XLOC_018639	-	Novel_lncRNA	chr12:47189869-47192771	1.53917	0.374216	2.04021	5e-05	0.000155633
ALDBSSCT0000011257	ALDBSSCG0000006838	-	Annotated_lncRNA	chr9:82461631-82481719	1.08635	0.374457	1.53662	0.0055	0.0120419
LNC_000191	XLOC_009406	-	Novel_lncRNA	chr1:154875180-154945335	1.48948	0.378412	1.97677	5e-05	0.000155633
ALDBSSCT0000005473	ALDBSSCG0000003318	-	Annotated_lncRNA	chr18:18854094-19023635	1.74097	0.379844	2.19642	5e-05	0.000155633
LNC_001162	XLOC_066962	-	Novel_lncRNA	chr9:113082322-113091476	1.51067	0.381471	1.98554	0.0027	0.00632229
LNC_000941	XLOC_052143	-	Novel_lncRNA	chr5:101193221-101201110	0.863471	0.384029	1.16893	0.0158	0.0309419
LNC_000139	XLOC_007107	-	Novel_lncRNA	JH118631.1:105528-107357	0.922469	0.384501	1.26251	0.00475	0.0105464
LNC_000361	XLOC_017282	-	Novel_lncRNA	chr11:19445422-19505744	5.25938	0.388006	3.76074	5e-05	0.000155633
ALDBSSCT0000005315	ALDBSSCG0000003218	-	Annotated_lncRNA	chr17:32125640-32136649	4.71236	0.394166	3.57958	5e-05	0.000155633
LNC_000483	XLOC_023441	-	Novel_lncRNA	chr13:47477148-47512822	0.749665	0.404785	0.889092	5e-05	0.000155633
LNC_000930	XLOC_051046	-	Novel_lncRNA	chr5:8500840-8594001	6.20225	0.408101	3.9258	0.0248	0.046056
LNC_001034	XLOC_058866	-	Novel_lncRNA	chr7:2339313-2345698	0.918345	0.410701	1.16095	0.0087	0.0181625
LNC_000920	XLOC_050205	-	Novel_lncRNA	chr5:51251867-51258609	3.72528	0.411141	3.17964	5e-05	0.000155633
LNC_000212	XLOC_011077	-	Novel_lncRNA	chr1:313792494-313794597	1.13001	0.412898	1.45248	0.00185	0.00448152
LNC_000292	XLOC_014669	-	Novel_lncRNA	chr10:38982560-39007111	0.863317	0.414251	1.05939	0.0023	0.00545969
LNC_000258	XLOC_013811	-	Novel_lncRNA	chr1:293753708-293756203	2.70583	0.416168	2.70083	5e-05	0.000155633
ALDBSSCT0000007679	ALDBSSCG0000004663	-	Annotated_lncRNA	chr4:114848282-114873296	0.833281	0.417058	0.998555	0.00175	0.00426169
LNC_000514	XLOC_025218	-	Novel_lncRNA	chr13:207352949-207356905	1.09464	0.418418	1.38744	0.01535	0.0301725
LNC_000377	XLOC_017824	-	Novel_lncRNA	chr12:5112703-5116240	0.938322	0.419108	1.16276	0.00325	0.00747375
LNC_000694	XLOC_034563	-	Novel_lncRNA	chr17:56571389-56576962	1.06817	0.426304	1.32518	5e-05	0.000155633
LNC_000758	XLOC_040310	-	Novel_lncRNA	chr2:26711030-26717999	1.06615	0.428294	1.31574	0.0232	0.0434531
LNC_001160	XLOC_066477	-	Novel_lncRNA	chr9:62427306-62439145	1.46257	0.44079	1.73034	5e-05	0.000155633
LNC_000558	XLOC_027689	-	Novel_lncRNA	chr14:50222451-50224770	2.6495	0.445513	2.57218	5e-05	0.000155633
ALDBSSCT0000007504	ALDBSSCG0000004552	-	Annotated_lncRNA	chr4:38963044-39069344	2.31231	0.451392	2.35688	5e-05	0.000155633
LNC_000768	XLOC_041066	-	Novel_lncRNA	chr2:73092632-73099908	0.974988	0.452911	1.10616	0.00075	0.00196127
LNC_000666	XLOC_033172	-	Novel_lncRNA	chr16:24322352-24326718	0.79117	0.456277	0.794078	0.0031	0.00716459
ALDBSSCT0000009651	ALDBSSCG0000005890	-	Annotated_lncRNA	chr7:13322222-13327937	1.29494	0.458412	1.49817	5e-05	0.000155633
LNC_000960	XLOC_053826	-	Novel_lncRNA	chr6:88900664-88917346	6.7427	0.461864	3.86779	0.00195	0.00470094
ALDBSSCT0000002233	ALDBSSCG0000001341	-	Annotated_lncRNA	chr12:35290307-35295411	1.10303	0.469518	1.23222	5e-05	0.000155633
LNC_000192	XLOC_009406	-	Novel_lncRNA	chr1:154875180-154945335	1.12399	0.472908	1.24899	0.0101	0.020731
ALDBSSCT0000010896	ALDBSSCG0000006603	-	Annotated_lncRNA	chr8:78359319-78367380	0.994846	0.472914	1.07289	5e-05	0.000155633
LNC_000190	XLOC_009406	-	Novel_lncRNA	chr1:154875180-154945335	1.77068	0.474753	1.89906	5e-05	0.000155633
LNC_000278	XLOC_014277	-	Novel_lncRNA	chr10:16118156-16125326	4.094	0.480909	3.08968	5e-05	0.000155633
LNC_000484	XLOC_023580	-	Novel_lncRNA	chr13:58242684-58251219	0.92541	0.497292	0.896001	0.00315	0.00727172
LNC_000485	XLOC_023615	-	Novel_lncRNA	chr13:58536610-58563075	1.0143	0.497475	1.02778	0.00015	0.000441639
ALDBSSCT0000008467	ALDBSSCG0000005144	-	Annotated_lncRNA	chr5:106499743-106501189	0.992867	0.50471	0.976147	0.0155	0.030434
ALDBSSCT0000002404	ALDBSSCG0000001455	-	Annotated_lncRNA	chr12:23213603-23219751	1.04195	0.506209	1.04148	0.00345	0.00789224
LNC_000705	XLOC_035696	-	Novel_lncRNA	chr18:5445371-5453536	0.713137	0.511303	0.48	0.00885	0.0184392
LNC_000116	XLOC_005553	-	Novel_lncRNA	GL896227.2:67608-76899	1.8641	0.517222	1.84963	0.01995	0.0380727
ALDBSSCT0000001537	ALDBSSCG0000000937	-	Annotated_lncRNA	chr10:57241008-57258137	7.45811	0.519983	3.84227	0.003	0.00695136
ALDBSSCT0000001144	ALDBSSCG0000000708	-	Annotated_lncRNA	chr10:19673320-19675520	0.950607	0.520401	0.869227	0.0186	0.0357738
ALDBSSCT0000011996	ALDBSSCG0000007305	-	Annotated_lncRNA	chrX:3591680-3965556	0.840887	0.526019	0.676798	0.0071	0.0151354
LNC_000525	XLOC_026208	-	Novel_lncRNA	chr14:60339944-60343948	1.98587	0.526866	1.91426	5e-05	0.000155633
LNC_000512	XLOC_025126	-	Novel_lncRNA	chr13:199064137-199074408	6.93366	0.528419	3.71386	5e-05	0.000155633
LNC_000363	XLOC_017297	-	Novel_lncRNA	chr11:19960582-19966119	1.0516	0.536286	0.971514	0.0086	0.0179767
ALDBSSCT0000006686	ALDBSSCG0000004084	-	Annotated_lncRNA	chr3:44171599-44175089	1.07912	0.542278	0.99275	0.0018	0.00437574
LNC_000893	XLOC_048252	-	Novel_lncRNA	chr4:46152202-46177804	2.27241	0.544016	2.0625	0.0005	0.00135038
ALDBSSCT0000000869	ALDBSSCG0000000526	-	Annotated_lncRNA	chr1:163824055-163829013	1.10468	0.545158	1.01889	0.00785	0.0165885
ALDBSSCT0000001912	ALDBSSCG0000001157	-	Annotated_lncRNA	chr11:14257313-14259257	0.99791	0.548114	0.864435	0.01015	0.0208169
LNC_000665	XLOC_033170	-	Novel_lncRNA	chr16:24300198-24307776	0.914152	0.552502	0.726455	0.00185	0.00448152
ALDBSSCT0000007255	ALDBSSCG0000004399	-	Annotated_lncRNA	chr3:90402362-90406702	1.63129	0.555218	1.55489	5e-05	0.000155633
ALDBSSCT0000006383	ALDBSSCG0000003905	-	Annotated_lncRNA	chr2:103686257-103826791	1.25875	0.565682	1.15392	0.0005	0.00135038
ALDBSSCT0000004247	ALDBSSCG0000002574	-	Annotated_lncRNA	chr15:92467599-92470041	1.92447	0.567737	1.76116	0.00385	0.00871955
LNC_000729	XLOC_038424	-	Novel_lncRNA	chr2:73122886-73144487	1.19453	0.577618	1.04826	5e-05	0.000155633
LNC_000358	XLOC_017282	-	Novel_lncRNA	chr11:19445422-19505744	10.1771	0.578328	4.1373	5e-05	0.000155633
LNC_000652	XLOC_032684	-	Novel_lncRNA	chr16:53997689-54013069	7.19918	0.587337	3.61557	0.0238	0.044461
LNC_000038	XLOC_002357	-	Novel_lncRNA	GL893849.1:2577-5778	15.7119	0.589927	4.73518	5e-05	0.000155633
ALDBSSCT0000003314	ALDBSSCG0000001994	-	Annotated_lncRNA	chr13:146709328-146714480	0.885286	0.594396	0.574721	0.0081	0.0170406
LNC_000531	XLOC_026479	-	Novel_lncRNA	chr14:81512336-81514728	1.26039	0.602309	1.06529	0.00855	0.0178889
LNC_001046	XLOC_059825	-	Novel_lncRNA	chr7:63908906-63911268	0.329906	0.606907	-0.879421	0.0246	0.0457414
ALDBSSCT0000011964	ALDBSSCG0000007281	-	Annotated_lncRNA	chrX:105952553-105963465	0.0812138	0.613515	-2.9173	5e-05	0.000155633
ALDBSSCT0000009334	ALDBSSCG0000005693	-	Annotated_lncRNA	chr6:51341553-51347518	0	0.619174	#NAME?	5e-05	0.000155633
ALDBSSCT0000009323	ALDBSSCG0000005685	-	Annotated_lncRNA	chr6:46525873-46534549	0.331515	0.622713	-0.909492	5e-05	0.000155633
LNC_000509	XLOC_025081	-	Novel_lncRNA	chr13:183463120-183487885	0.253359	0.623103	-1.29828	5e-05	0.000155633
ALDBSSCT0000006740	ALDBSSCG0000004114	-	Annotated_lncRNA	chr3:59995061-60010272	0.937608	0.624479	0.586331	0.02535	0.0469222
LNC_000242	XLOC_012554	-	Novel_lncRNA	chr1:146324884-146334352	3.63583	0.624595	2.54129	5e-05	0.000155633
ALDBSSCT0000008104	ALDBSSCG0000004919	-	Annotated_lncRNA	chr4:114667405-114669450	3.26966	0.628153	2.37995	5e-05	0.000155633
ALDBSSCT0000005897	ALDBSSCG0000003596	-	Annotated_lncRNA	chr2:59273926-59276067	0.136271	0.630604	-2.21025	0.0042	0.00943372
ALDBSSCT0000007366	ALDBSSCG0000004471	-	Annotated_lncRNA	chr3:137665474-137665993	65.6993	0.633433	6.69654	0.00065	0.00172234
ALDBSSCT0000009475	ALDBSSCG0000005778	-	Annotated_lncRNA	chr6:96138071-96163022	1.88667	0.635403	1.57009	5e-05	0.000155633
ALDBSSCT0000009714	ALDBSSCG0000005934	-	Annotated_lncRNA	chr7:37642288-37660260	1.24445	0.635527	0.969484	0.0037	0.00841697
LNC_000234	XLOC_012120	-	Novel_lncRNA	chr1:104133926-104141822	0.391262	0.639081	-0.707862	0.0011	0.00278961
LNC_000901	XLOC_048866	-	Novel_lncRNA	chr4:103029894-103054748	1.34907	0.643404	1.06817	0.00015	0.000441639
LNC_001130	XLOC_065250	-	Novel_lncRNA	chr9:133026734-133029444	0.317554	0.649352	-1.032	0.01555	0.0305222
ALDBSSCT0000007521	ALDBSSCG0000004564	-	Annotated_lncRNA	chr4:44646076-44651760	0.316588	0.649498	-1.03672	0.02415	0.0450352
LNC_000336	XLOC_016496	-	Novel_lncRNA	chr11:19897074-19902021	1.44178	0.649774	1.14984	5e-05	0.000155633
LNC_000961	XLOC_053890	-	Novel_lncRNA	chr6:95807082-95808725	0.285421	0.649915	-1.18716	0.02025	0.0385673
LNC_001009	XLOC_057106	-	Novel_lncRNA	chr7:18869164-18874136	1.11201	0.651518	0.771297	0.0001	0.000300888
ALDBSSCT0000005658	ALDBSSCG0000003433	-	Annotated_lncRNA	chr18:18770432-18776091	2.11421	0.657238	1.68563	5e-05	0.000155633
ALDBSSCT0000011846	ALDBSSCG0000007195	-	Annotated_lncRNA	GL896152.2:24064-25471	1.1894	0.660218	0.849217	0.0213	0.0402724
ALDBSSCT0000002106	ALDBSSCG0000001267	-	Annotated_lncRNA	chr12:686794-772840	0.368219	0.664417	-0.851524	5e-05	0.000155633
ALDBSSCT0000009474	ALDBSSCG0000005778	-	Annotated_lncRNA	chr6:96138071-96163022	1.8448	0.664938	1.47217	5e-05	0.000155633
ALDBSSCT0000009144	ALDBSSCG0000005573	-	Annotated_lncRNA	chr6:146521007-146524413	0.306749	0.668633	-1.12416	0.0177	0.0342593
LNC_000314	XLOC_015951	-	Novel_lncRNA	chr10:57185720-57210418	4.42351	0.669484	2.72407	5e-05	0.000155633
LNC_000236	XLOC_012137	-	Novel_lncRNA	chr1:104222574-104252930	0.466667	0.673347	-0.528958	0.0005	0.00135038
LNC_001142	XLOC_065454	-	Novel_lncRNA	chr9:148524975-148526899	0.198289	0.677376	-1.77235	0.0039	0.00882277
LNC_001041	XLOC_059546	-	Novel_lncRNA	chr7:45105165-45106685	0.302636	0.677547	-1.16274	0.02615	0.0481894
LNC_000442	XLOC_021665	-	Novel_lncRNA	chr13:111384092-111422274	0.207123	0.677571	-1.70988	5e-05	0.000155633
LNC_000983	XLOC_055216	-	Novel_lncRNA	chr6:46563182-46604364	0.346722	0.68489	-0.982094	0.0239	0.0446292
ALDBSSCT0000002675	ALDBSSCG0000001624	-	Annotated_lncRNA	chr13:77725605-77734057	0.0646808	0.690666	-3.41658	0.00075	0.00196127
ALDBSSCT0000004304	ALDBSSCG0000002604	-	Annotated_lncRNA	chr15:120923890-120930412	1.13213	0.694051	0.70592	5e-05	0.000155633
ALDBSSCT0000011106	ALDBSSCG0000006741	-	Annotated_lncRNA	chr9:22266565-22276078	1.95857	0.694113	1.49656	5e-05	0.000155633
LNC_000019	XLOC_000804	-	Novel_lncRNA	GL892882.1:69939-77810	4.43979	0.697198	2.67085	5e-05	0.000155633
ALDBSSCT0000006639	ALDBSSCG0000004060	-	Annotated_lncRNA	chr3:38843206-38846671	0.326985	0.697258	-1.09247	0.00415	0.00933425
LNC_001055	XLOC_060919	-	Novel_lncRNA	chr8:10052142-10053518	0	0.697471	#NAME?	0.0001	0.000300888
LNC_000551	XLOC_027483	-	Novel_lncRNA	chr14:33495168-33501902	0.368196	0.699098	-0.925021	5e-05	0.000155633
LNC_000588	XLOC_028763	-	Novel_lncRNA	chr14:138316543-138325827	0.309746	0.704858	-1.18625	5e-05	0.000155633
LNC_000479	XLOC_023316	-	Novel_lncRNA	chr13:37411651-37415751	0.351618	0.707399	-1.00852	0.00065	0.00172234
LNC_000739	XLOC_039093	-	Novel_lncRNA	chr2:120846049-120866973	0.17031	0.72276	-2.08536	5e-05	0.000155633
LNC_000238	XLOC_012247	-	Novel_lncRNA	chr1:119819042-119822650	0.285121	0.722877	-1.34218	0.0255	0.0471561
LNC_000421	XLOC_020267	-	Novel_lncRNA	chr12:57554548-57677541	4.36793	0.7272	2.58653	5e-05	0.000155633
ALDBSSCT0000008894	ALDBSSCG0000005435	-	Annotated_lncRNA	chr6:57439975-57445037	0.167009	0.728255	-2.12452	0.00035	0.000971111
ALDBSSCT0000002309	ALDBSSCG0000001393	-	Annotated_lncRNA	chr12:62300758-62307945	2.14873	0.729088	1.55932	0.00015	0.000441639
LNC_000246	XLOC_012788	-	Novel_lncRNA	chr1:178905033-179184882	0.338386	0.733067	-1.11527	0.0156	0.0306069
ALDBSSCT0000000826	ALDBSSCG0000000500	-	Annotated_lncRNA	chr1:146460083-146463647	1.16966	0.735514	0.669267	0.0026	0.00611204
LNC_000300	XLOC_015072	-	Novel_lncRNA	chr10:75626139-75648792	1.26326	0.742167	0.767337	5e-05	0.000155633
LNC_000282	XLOC_014331	-	Novel_lncRNA	chr10:20138130-20147302	0.170989	0.743111	-2.11968	0.00545	0.0119427
ALDBSSCT0000003758	ALDBSSCG0000002254	-	Annotated_lncRNA	chr14:136229931-136245593	0.2522	0.743225	-1.55923	0.01875	0.0360315
LNC_000849	XLOC_046120	-	Novel_lncRNA	chr4:13231727-13242980	1.82333	0.74838	1.28474	5e-05	0.000155633
LNC_000510	XLOC_025124	-	Novel_lncRNA	chr13:198954947-198955939	5.94632	0.749639	2.98773	5e-05	0.000155633
LNC_001119	XLOC_064620	-	Novel_lncRNA	chr9:72400109-72402877	0.164109	0.750815	-2.1938	0.0019	0.00459088
ALDBSSCT0000009654	ALDBSSCG0000005891	-	Annotated_lncRNA	chr7:13825877-13848657	0.178679	0.752561	-2.07444	0.00315	0.00727172
LNC_001011	XLOC_057223	-	Novel_lncRNA	chr7:22805911-22806715	11.3593	0.753975	3.91321	5e-05	0.000155633
ALDBSSCT0000006979	ALDBSSCG0000004236	-	Annotated_lncRNA	chr3:142624628-142636746	0.143562	0.75991	-2.40415	5e-05	0.000155633
LNC_000650	XLOC_032645	-	Novel_lncRNA	chr16:51745604-51747196	2.80168	0.760798	1.88071	5e-05	0.000155633
LNC_000822	XLOC_044107	-	Novel_lncRNA	chr3:1011361-1015074	0.364634	0.766897	-1.07258	0.00635	0.0137009
ALDBSSCT0000002225	ALDBSSCG0000001336	-	Annotated_lncRNA	chr12:32823579-32826316	0.296318	0.776488	-1.38982	0.0038	0.00862044
LNC_001077	XLOC_062288	-	Novel_lncRNA	chr8:15912364-16034116	1.54193	0.77671	0.989291	5e-05	0.000155633
LNC_000297	XLOC_015053	-	Novel_lncRNA	chr10:72789755-72795573	0.218998	0.778871	-1.83047	0.0113	0.0228854
LNC_000966	XLOC_054252	-	Novel_lncRNA	chr6:145477912-145496027	0.346785	0.788316	-1.18473	0.01925	0.0368897
LNC_000401	XLOC_018703	-	Novel_lncRNA	chr12:49539694-49543696	0.451241	0.792	-0.811601	0.0023	0.00545969
ALDBSSCT0000006856	ALDBSSCG0000004178	-	Annotated_lncRNA	chr3:120658642-120663895	0.342847	0.805757	-1.23278	0.00065	0.00172234
LNC_000308	XLOC_015683	-	Novel_lncRNA	chr10:36215387-36240079	2.53743	0.806885	1.65293	0.00365	0.00831481
ALDBSSCT0000001535	ALDBSSCG0000000936	-	Annotated_lncRNA	chr10:57153423-57175699	4.69163	0.810769	2.53273	0.0061	0.0132075
LNC_000304	XLOC_015352	-	Novel_lncRNA	chr10:16098637-16099825	7.50028	0.811085	3.20902	0.0003	0.000841218
LNC_000360	XLOC_017282	-	Novel_lncRNA	chr11:19445422-19505744	4.00664	0.812421	2.30209	5e-05	0.000155633
ALDBSSCT0000007233	ALDBSSCG0000004392	-	Annotated_lncRNA	chr3:83825541-83867875	0.389353	0.815026	-1.06577	0.0001	0.000300888
LNC_000427	XLOC_020720	-	Novel_lncRNA	chr13:31644439-31648118	1.18994	0.815739	0.544715	0.01235	0.024805
ALDBSSCT0000010893	ALDBSSCG0000006600	-	Annotated_lncRNA	chr8:75349972-75353117	1.42048	0.816402	0.799023	0.0002	0.000578608
LNC_000135	XLOC_006649	-	Novel_lncRNA	JH118429.1:5534-9247	0.340208	0.816672	-1.26334	0.0055	0.0120419
LNC_000530	XLOC_026478	-	Novel_lncRNA	chr14:81129693-81218515	1.86687	0.821656	1.18401	0.00385	0.00871955
ALDBSSCT0000004482	ALDBSSCG0000002732	-	Annotated_lncRNA	chr15:66570280-66595167	2.83329	0.827886	1.77498	0.0011	0.00278961
LNC_000994	XLOC_056185	-	Novel_lncRNA	chr6:108670628-108674530	2.10854	0.837872	1.33145	5e-05	0.000155633
ALDBSSCT0000000843	ALDBSSCG0000000509	-	Annotated_lncRNA	chr1:152624112-152625032	2.36502	0.838848	1.49537	0.0022	0.00524588
ALDBSSCT0000003460	ALDBSSCG0000002086	-	Annotated_lncRNA	chr14:7275433-7279293	1.17212	0.840022	0.480617	0.0198	0.0378105
ALDBSSCT0000004488	ALDBSSCG0000002734	-	Annotated_lncRNA	chr15:70682526-70689189	0.590823	0.841642	-0.510479	0.00715	0.0152294
LNC_000924	XLOC_050418	-	Novel_lncRNA	chr5:69481848-69487400	1.90152	0.843273	1.17308	5e-05	0.000155633
ALDBSSCT0000011872	ALDBSSCG0000007218	-	Annotated_lncRNA	JH118724.1:89267-94343	1.66307	0.845338	0.976252	5e-05	0.000155633
LNC_000585	XLOC_028735	-	Novel_lncRNA	chr14:135422488-135425964	2.05187	0.848577	1.27383	5e-05	0.000155633
ALDBSSCT0000005618	ALDBSSCG0000003401	-	Annotated_lncRNA	chr18:3054013-3057893	0.262046	0.851535	-1.70025	5e-05	0.000155633
ALDBSSCT0000010443	ALDBSSCG0000006345	-	Annotated_lncRNA	chr8:33609151-33748574	3.39258	0.85844	1.98259	0.0002	0.000578608
LNC_000874	XLOC_047640	-	Novel_lncRNA	chr4:140760947-140766384	1.64109	0.861276	0.930111	5e-05	0.000155633
LNC_000780	XLOC_041779	-	Novel_lncRNA	chr2:122538800-122559052	0.22662	0.861955	-1.92733	0.02685	0.0493882
LNC_000895	XLOC_048355	-	Novel_lncRNA	chr4:62849255-62870579	9.87743	0.863264	3.51626	5e-05	0.000155633
ALDBSSCT0000000638	ALDBSSCG0000000384	-	Annotated_lncRNA	chr1:10261473-10309143	2.46047	0.865108	1.50798	0.0001	0.000300888
LNC_001016	XLOC_057501	-	Novel_lncRNA	chr7:36958701-37008146	0.416511	0.867259	-1.05811	0.0122	0.0245284
LNC_000237	XLOC_012138	-	Novel_lncRNA	chr1:104253037-104261776	0.542099	0.870218	-0.682822	0.0044	0.0098411
LNC_000896	XLOC_048505	-	Novel_lncRNA	chr4:80527531-80535308	1.63293	0.870831	0.906997	5e-05	0.000155633
LNC_001008	XLOC_056993	-	Novel_lncRNA	chr7:18546507-18555226	1.3934	0.872823	0.674852	0.01965	0.037556
ALDBSSCT0000005333	ALDBSSCG0000003227	-	Annotated_lncRNA	chr17:35116647-35126297	2.16283	0.87499	1.30558	0.0157	0.0307796
LNC_000584	XLOC_028713	-	Novel_lncRNA	chr14:131750073-131791014	2.32227	0.875707	1.40702	5e-05	0.000155633
LNC_000348	XLOC_016927	-	Novel_lncRNA	chr11:84496906-84512443	0.623771	0.876251	-0.490327	0.00165	0.00403458
ALDBSSCT0000008955	ALDBSSCG0000005482	-	Annotated_lncRNA	chr6:81651842-81660219	2.31135	0.886457	1.38261	5e-05	0.000155633
ALDBSSCT0000000346	ALDBSSCG0000000207	-	Annotated_lncRNA	chr1:179704450-179706225	1.70998	0.891088	0.940343	0.0098	0.0201751
LNC_000540	XLOC_027012	-	Novel_lncRNA	chr14:139125596-139134722	0.239996	0.905412	-1.91556	0.00015	0.000441639
ALDBSSCT0000000554	ALDBSSCG0000000328	-	Annotated_lncRNA	chr1:303591822-303626212	0.191717	0.907047	-2.2422	5e-05	0.000155633
LNC_000856	XLOC_046320	-	Novel_lncRNA	chr4:37122070-37130233	1.49005	0.909878	0.711614	0.0209	0.0396163
ALDBSSCT0000001334	ALDBSSCG0000000813	-	Annotated_lncRNA	chr10:71390160-71392350	0.382214	0.916849	-1.2623	0.0272	0.0499297
LNC_001151	XLOC_066066	-	Novel_lncRNA	chr9:35797310-35802237	1.57077	0.916927	0.776595	5e-05	0.000155633
LNC_000750	XLOC_039524	-	Novel_lncRNA	chr2:148035265-148037858	2.9902	0.933566	1.67942	5e-05	0.000155633
ALDBSSCT0000008630	ALDBSSCG0000005252	-	Annotated_lncRNA	chr5:81373619-81375887	0.341221	0.936927	-1.45723	0.0064	0.0137955
ALDBSSCT0000004236	ALDBSSCG0000002566	-	Annotated_lncRNA	chr15:88691763-88692359	2.69147	0.942949	1.51314	0.009	0.0186975
LNC_001172	XLOC_068100	-	Novel_lncRNA	chrX:101548546-101550477	1.65086	0.944794	0.80515	0.00325	0.00747375
LNC_000229	XLOC_012025	-	Novel_lncRNA	chr1:92382374-92384780	2.68231	0.947549	1.50121	5e-05	0.000155633
LNC_000213	XLOC_011090	-	Novel_lncRNA	chr1:313906759-313914477	0.452033	0.951268	-1.07342	5e-05	0.000155633
LNC_001137	XLOC_065426	-	Novel_lncRNA	chr9:144634912-144642920	2.99902	0.95694	1.64799	5e-05	0.000155633
ALDBSSCT0000008287	ALDBSSCG0000005032	-	Annotated_lncRNA	chr5:22948749-22950461	2.74545	0.964094	1.5098	0.0185	0.035612
LNC_000749	XLOC_039499	-	Novel_lncRNA	chr2:147264781-147267796	0.132949	0.965998	-2.86115	5e-05	0.000155633
LNC_000335	XLOC_016456	-	Novel_lncRNA	chr11:18916086-18929561	1.87651	0.966624	0.957022	0.0017	0.0041495
ALDBSSCT0000009432	ALDBSSCG0000005754	-	Annotated_lncRNA	chr6:78193362-78195251	2.42931	0.975836	1.31583	0.0027	0.00632229
ALDBSSCT0000001706	ALDBSSCG0000001029	-	Annotated_lncRNA	chr11:16390094-16391186	3.03869	0.978245	1.63518	5e-05	0.000155633
LNC_000790	XLOC_042305	-	Novel_lncRNA	chr3:5628631-5636138	1.94858	0.981872	0.988815	5e-05	0.000155633
LNC_000438	XLOC_021448	-	Novel_lncRNA	chr13:99096507-99145383	0.374949	0.983833	-1.39172	5e-05	0.000155633
LNC_000290	XLOC_014521	-	Novel_lncRNA	chr10:35448752-35497279	0.307675	0.985805	-1.6799	0.0002	0.000578608
LNC_000174	XLOC_008761	-	Novel_lncRNA	chr1:88360319-88565314	1.42522	0.987112	0.529903	0.0008	0.00208292
LNC_001136	XLOC_065426	-	Novel_lncRNA	chr9:144634912-144642920	2.53988	0.992873	1.35508	5e-05	0.000155633
LNC_000281	XLOC_014290	-	Novel_lncRNA	chr10:16204814-16215148	5.9629	0.994551	2.5839	5e-05	0.000155633
LNC_000748	XLOC_039483	-	Novel_lncRNA	chr2:147019402-147024256	0.66801	0.997671	-0.578694	0.00305	0.0070572
LNC_000727	XLOC_038105	-	Novel_lncRNA	chr2:59400276-59406107	1.46439	1.00423	0.544205	0.0158	0.0309419
ALDBSSCT0000011369	ALDBSSCG0000006908	-	Annotated_lncRNA	chr9:143964057-143970784	0.289857	1.01593	-1.80938	5e-05	0.000155633
ALDBSSCT0000006234	ALDBSSCG0000003810	-	Annotated_lncRNA	chr2:28720755-28723879	2.55066	1.02411	1.3165	0.0021	0.00502947
ALDBSSCT0000001248	ALDBSSCG0000000756	-	Annotated_lncRNA	chr10:47712355-47727977	5.11056	1.02513	2.31768	5e-05	0.000155633
ALDBSSCT0000006477	ALDBSSCG0000003955	-	Annotated_lncRNA	chr2:147110861-147111328	3.53864	1.03724	1.77044	0.0118	0.0237854
ALDBSSCT0000007821	ALDBSSCG0000004736	-	Annotated_lncRNA	chr4:1006362-1008315	0.453375	1.0376	-1.19447	0.008	0.0168619
ALDBSSCT0000004658	ALDBSSCG0000002837	-	Annotated_lncRNA	chr15:154469268-154471155	0.353528	1.03856	-1.55469	0.01375	0.0273568
LNC_000215	XLOC_011090	-	Novel_lncRNA	chr1:313906759-313914477	0.194968	1.04174	-2.41769	5e-05	0.000155633
LNC_000872	XLOC_047573	-	Novel_lncRNA	chr4:137010384-137014984	0.277032	1.04562	-1.91624	0.0001	0.000300888
ALDBSSCT0000004463	ALDBSSCG0000002720	-	Annotated_lncRNA	chr15:61933260-61946104	1.59232	1.04839	0.602947	0.00045	0.00122529
ALDBSSCT0000007667	ALDBSSCG0000004657	-	Annotated_lncRNA	chr4:109080997-109083204	1.59191	1.04874	0.602106	0.00905	0.0187775
LNC_000291	XLOC_014597	-	Novel_lncRNA	chr10:36424764-36430950	0.112871	1.05314	-3.22194	5e-05	0.000155633
ALDBSSCT0000002171	ALDBSSCG0000001297	-	Annotated_lncRNA	chr12:12472748-12487532	0.690313	1.07651	-0.641037	0.02065	0.039221
ALDBSSCT0000006589	ALDBSSCG0000004026	-	Annotated_lncRNA	chr3:19790860-19791759	2.37419	1.0796	1.13694	0.0067	0.0143766
ALDBSSCT0000002620	ALDBSSCG0000001593	-	Annotated_lncRNA	chr13:35883428-35885697	0.529478	1.0807	-1.02932	0.00845	0.0176961
ALDBSSCT0000000967	ALDBSSCG0000000594	-	Annotated_lncRNA	chr1:245115119-245127223	2.93487	1.09084	1.42786	0.0066	0.0141942
LNC_000406	XLOC_019111	-	Novel_lncRNA	chr12:2528740-2540709	0.32768	1.09386	-1.73907	5e-05	0.000155633
ALDBSSCT0000000541	ALDBSSCG0000000322	-	Annotated_lncRNA	chr1:301365112-301378017	2.70868	1.09442	1.30742	5e-05	0.000155633
ALDBSSCT0000011821	ALDBSSCG0000007177	-	Annotated_lncRNA	GL893911.1:15261-23800	2.50136	1.09701	1.18913	5e-05	0.000155633
ALDBSSCT0000000928	ALDBSSCG0000000571	-	Annotated_lncRNA	chr1:216464533-216467316	2.61664	1.0976	1.25336	5e-05	0.000155633
LNC_000388	XLOC_018137	-	Novel_lncRNA	chr12:21525211-21526666	0.276757	1.09794	-1.9881	0.0232	0.0434531
LNC_000075	XLOC_003842	-	Novel_lncRNA	GL894750.2:77654-126791	0.221325	1.10022	-2.31355	0.00015	0.000441639
ALDBSSCT0000005452	ALDBSSCG0000003302	-	Annotated_lncRNA	chr18:8550429-8553365	2.30509	1.10697	1.05821	5e-05	0.000155633
ALDBSSCT0000006536	ALDBSSCG0000003996	-	Annotated_lncRNA	chr3:5383662-5410016	0.606918	1.10884	-0.869479	0.0144	0.0285205
LNC_000580	XLOC_028539	-	Novel_lncRNA	chr14:113184204-113185649	0.28002	1.11214	-1.98974	0.01055	0.0215438
LNC_000854	XLOC_046236	-	Novel_lncRNA	chr4:24676564-24677805	0.351801	1.11325	-1.66194	0.0143	0.0283475
ALDBSSCT0000005474	ALDBSSCG0000003318	-	Annotated_lncRNA	chr18:18854094-19023635	2.51125	1.12245	1.16175	5e-05	0.000155633
ALDBSSCT0000004471	ALDBSSCG0000002725	-	Annotated_lncRNA	chr15:63711793-63721340	2.61495	1.12556	1.21614	5e-05	0.000155633
LNC_000825	XLOC_044339	-	Novel_lncRNA	chr3:17118038-17122909	0.455288	1.12656	-1.30707	0.00685	0.0146617
ALDBSSCT0000006652	ALDBSSCG0000004069	-	Annotated_lncRNA	chr3:40497553-40500112	0.497583	1.12659	-1.17895	0.00885	0.0184392
ALDBSSCT0000007696	ALDBSSCG0000004674	-	Annotated_lncRNA	chr4:121465809-121472608	0.341895	1.12902	-1.72345	5e-05	0.000155633
LNC_000921	XLOC_050386	-	Novel_lncRNA	chr5:66658751-66664135	0.726753	1.14278	-0.653016	0.02325	0.0435377
LNC_000497	XLOC_024664	-	Novel_lncRNA	chr13:140340195-140363014	0.244531	1.14762	-2.23056	5e-05	0.000155633
ALDBSSCT0000006065	ALDBSSCG0000003713	-	Annotated_lncRNA	chr2:147267920-147272588	0	1.14971	#NAME?	0.005	0.0110347
LNC_000534	XLOC_026640	-	Novel_lncRNA	chr14:104011938-104270645	0	1.15031	#NAME?	5e-05	0.000155633
LNC_000816	XLOC_044007	-	Novel_lncRNA	chr3:135908256-135914164	1.79662	1.1562	0.635902	0.011	0.0223636
LNC_000583	XLOC_028713	-	Novel_lncRNA	chr14:131750073-131791014	3.28109	1.1571	1.50365	5e-05	0.000155633
ALDBSSCT0000004483	ALDBSSCG0000002732	-	Annotated_lncRNA	chr15:66570280-66595167	3.65495	1.16042	1.65521	5e-05	0.000155633
LNC_000762	XLOC_040510	-	Novel_lncRNA	chr2:43621957-43627111	0.579615	1.16112	-1.00234	5e-05	0.000155633
LNC_001007	XLOC_056830	-	Novel_lncRNA	chr7:13056634-13321227	3.64148	1.16862	1.63972	0.0003	0.000841218
LNC_000342	XLOC_016660	-	Novel_lncRNA	chr11:52563037-52585846	1.85674	1.17238	0.663331	0.00015	0.000441639
ALDBSSCT0000009129	ALDBSSCG0000005567	-	Annotated_lncRNA	chr6:143658805-143661919	8.4876	1.17305	2.85509	5e-05	0.000155633
LNC_000117	XLOC_005553	-	Novel_lncRNA	GL896227.2:67608-76899	3.00499	1.17532	1.35431	5e-05	0.000155633
LNC_000286	XLOC_014362	-	Novel_lncRNA	chr10:22903316-22906284	0.562291	1.18049	-1.07	0.0003	0.000841218
LNC_000176	XLOC_008796	-	Novel_lncRNA	chr1:92162676-92172741	1.96691	1.19106	0.723684	0.0001	0.000300888
LNC_000630	XLOC_031429	-	Novel_lncRNA	chr15:87578685-87580849	1.92636	1.19398	0.690099	0.02225	0.0418703
LNC_000085	XLOC_004238	-	Novel_lncRNA	GL895110.2:195991-201738	2.53917	1.19665	1.08536	5e-05	0.000155633
LNC_000862	XLOC_046883	-	Novel_lncRNA	chr4:94907119-94912441	1.77302	1.19738	0.566329	0.0049	0.0108433
ALDBSSCT0000011965	ALDBSSCG0000007282	-	Annotated_lncRNA	chrX:113105074-113109306	4.53121	1.20626	1.90935	0.00075	0.00196127
LNC_000918	XLOC_049948	-	Novel_lncRNA	chr5:23264081-23267443	0.401485	1.21023	-1.59186	0.0001	0.000300888
LNC_000396	XLOC_018492	-	Novel_lncRNA	chr12:40901924-40908784	0.298241	1.21121	-2.0219	5e-05	0.000155633
LNC_000627	XLOC_031056	-	Novel_lncRNA	chr15:54731400-54859103	2.67464	1.2151	1.13827	0.0032	0.00737293
ALDBSSCT0000005534	ALDBSSCG0000003352	-	Annotated_lncRNA	chr18:43096877-43205380	2.73214	1.22156	1.1613	5e-05	0.000155633
LNC_000605	XLOC_029471	-	Novel_lncRNA	chr15:53661930-53687829	2.84558	1.22859	1.21172	5e-05	0.000155633
LNC_000337	XLOC_016540	-	Novel_lncRNA	chr11:23562879-23581601	0.335922	1.23051	-1.87306	5e-05	0.000155633
ALDBSSCT0000008132	ALDBSSCG0000004935	-	Annotated_lncRNA	chr4:121137840-121145827	1.72067	1.23059	0.483619	0.00205	0.00492153
LNC_000795	XLOC_042708	-	Novel_lncRNA	chr3:33305440-33311592	0.657846	1.24449	-0.919737	0.0108	0.0219993
ALDBSSCT0000003080	ALDBSSCG0000001850	-	Annotated_lncRNA	chr13:27043723-27046723	5.50255	1.25661	2.13056	5e-05	0.000155633
ALDBSSCT0000007535	ALDBSSCG0000004572	-	Annotated_lncRNA	chr4:51312434-51322933	0.902972	1.25947	-0.48006	0.0026	0.00611204
LNC_000481	XLOC_023372	-	Novel_lncRNA	chr13:43450555-43455163	1.89128	1.26299	0.582518	0.0057	0.0124359
ALDBSSCT0000007483	ALDBSSCG0000004537	-	Annotated_lncRNA	chr4:21883403-21888554	2.99204	1.26961	1.23674	5e-05	0.000155633
LNC_000725	XLOC_037957	-	Novel_lncRNA	chr2:48089155-48609204	3.14709	1.27403	1.30462	5e-05	0.000155633
LNC_001120	XLOC_064920	-	Novel_lncRNA	chr9:98589970-98766514	4.40461	1.27477	1.78878	0.0004	0.00109881
LNC_001152	XLOC_066071	-	Novel_lncRNA	chr9:35821196-35844157	2.61384	1.28859	1.02038	5e-05	0.000155633
ENSSSCT00000035935	ENSSSCG00000024809	CLCN4	Annotated_lncRNA	chrX:7339506-7419608	0.782713	1.29249	-0.723602	0.00095	0.00244511
LNC_001018	XLOC_057501	-	Novel_lncRNA	chr7:36958701-37008146	0.459038	1.31224	-1.51535	0.00565	0.0123388
LNC_000002	XLOC_000177	-	Novel_lncRNA	GL892353.1:8377-8962	12.6325	1.32188	3.25647	0.00155	0.00381081
LNC_000995	XLOC_056285	-	Novel_lncRNA	chr6:123433773-123556379	0.503983	1.32639	-1.39606	0.01585	0.0310296
ALDBSSCT0000002387	ALDBSSCG0000001446	-	Annotated_lncRNA	chr12:18663527-18671417	0.606289	1.32851	-1.13174	0.0061	0.0132075
ALDBSSCT0000008741	ALDBSSCG0000005334	-	Annotated_lncRNA	chr6:12314946-12322156	0	1.34644	#NAME?	0.01845	0.0355272
LNC_001107	XLOC_063865	-	Novel_lncRNA	chr9:10627402-10628432	0.342201	1.34743	-1.97729	0.0201	0.0383223
LNC_000267	XLOC_014206	-	Novel_lncRNA	chr10:10595628-10599145	3.0584	1.35299	1.17662	5e-05	0.000155633
ALDBSSCT0000000561	ALDBSSCG0000000332	-	Annotated_lncRNA	chr1:306016623-306017621	0.510048	1.35454	-1.4091	0.02295	0.0430432
LNC_001177	XLOC_068554	-	Novel_lncRNA	chrX:38433352-38434696	0.696171	1.36108	-0.967243	0.01085	0.0220911
LNC_000826	XLOC_044454	-	Novel_lncRNA	chr3:22699597-22704060	0.900019	1.37046	-0.606638	0.00225	0.00535445
ENSSSCT00000004790	ENSSSCG00000004334	MAP3K7	Annotated_lncRNA	chr1:65478904-65542600	6.01738	1.37146	2.13343	0.0043	0.00963543
ALDBSSCT0000002115	ALDBSSCG0000001268	-	Annotated_lncRNA	chr12:1573102-1579448	0.451497	1.38258	-1.61457	5e-05	0.000155633
ALDBSSCT0000005708	ALDBSSCG0000003464	-	Annotated_lncRNA	chr18:42159864-42170214	0.667791	1.38444	-1.05183	0.0162	0.0316321
LNC_000698	XLOC_034871	-	Novel_lncRNA	chr17:9159279-9161372	3.73942	1.3896	1.42815	5e-05	0.000155633
ALDBSSCT0000002238	ALDBSSCG0000001345	-	Annotated_lncRNA	chr12:37344338-37350558	3.94827	1.39111	1.50499	0.00165	0.00403458
ALDBSSCT0000002851	ALDBSSCG0000001735	-	Annotated_lncRNA	chr13:154340611-154766358	0.715341	1.40242	-0.971214	0.0042	0.00943372
LNC_000607	XLOC_029514	-	Novel_lncRNA	chr15:55990052-55992873	0.680537	1.42282	-1.06401	0.0001	0.000300888
LNC_000319	XLOC_016083	-	Novel_lncRNA	chr10:71123472-71125654	2.04516	1.4317	0.514488	0.02075	0.0393735
ALDBSSCT0000011771	ALDBSSCG0000007136	-	Annotated_lncRNA	chr9:148558386-148568813	3.65794	1.43593	1.34905	0.00865	0.0180728
LNC_000914	XLOC_049613	-	Novel_lncRNA	chr5:6302785-6315655	0	1.44327	#NAME?	5e-05	0.000155633
ALDBSSCT0000010856	ALDBSSCG0000006576	-	Annotated_lncRNA	chr8:57410199-57417376	1.0595	1.44384	-0.446534	0.00905	0.0187775
ALDBSSCT0000001339	ALDBSSCG0000000818	-	Annotated_lncRNA	chr10:72935165-72944311	4.04713	1.45202	1.47883	0.0002	0.000578608
ALDBSSCT0000006669	ALDBSSCG0000004077	-	Annotated_lncRNA	chr3:41514838-41525893	1.03041	1.4589	-0.501661	0.00165	0.00403458
LNC_000451	XLOC_021951	-	Novel_lncRNA	chr13:133132130-133142660	3.61665	1.47192	1.29696	5e-05	0.000155633
ALDBSSCT0000009799	ALDBSSCG0000005976	-	Annotated_lncRNA	chr7:63840098-63852039	0.748502	1.47291	-0.976589	0.02175	0.0410369
LNC_000701	XLOC_035424	-	Novel_lncRNA	chr17:53383615-53386304	0.464986	1.47375	-1.66424	0.0006	0.00159881
LNC_000811	XLOC_043651	-	Novel_lncRNA	chr3:102361662-102365999	4.03598	1.47448	1.45272	5e-05	0.000155633
ALDBSSCT0000006047	ALDBSSCG0000003702	-	Annotated_lncRNA	chr2:142447470-142462284	0.877526	1.48059	-0.754654	0.0002	0.000578608
ALDBSSCT0000004228	ALDBSSCG0000002558	-	Annotated_lncRNA	chr15:82629362-82905734	2.2043	1.49882	0.556494	0.0233	0.0436131
LNC_000925	XLOC_050582	-	Novel_lncRNA	chr5:82647304-82649171	2.39988	1.50219	0.675898	0.01035	0.0211788
LNC_000260	XLOC_013928	-	Novel_lncRNA	chr1:301399994-301403273	4.91053	1.50484	1.70627	5e-05	0.000155633
LNC_000834	XLOC_045238	-	Novel_lncRNA	chr3:75034848-75037426	0.126095	1.51747	-3.58908	0.00145	0.00359101
ALDBSSCT0000009980	ALDBSSCG0000006070	-	Annotated_lncRNA	chr7:129269253-129270012	3.27378	1.53098	1.0965	0.0105	0.0214588
LNC_000647	XLOC_032345	-	Novel_lncRNA	chr16:22729628-22784889	0.487417	1.53436	-1.65441	0.00045	0.00122529
ALDBSSCT0000006635	ALDBSSCG0000004056	-	Annotated_lncRNA	chr3:38450783-38462250	0.805201	1.5384	-0.934009	0.0136	0.0270854
LNC_000424	XLOC_020678	-	Novel_lncRNA	chr13:28954586-28959920	0.635684	1.54248	-1.27887	0.02025	0.0385673
ALDBSSCT0000004348	ALDBSSCG0000002634	-	Annotated_lncRNA	chr15:146076496-146078461	2.96833	1.55047	0.936945	0.0003	0.000841218
LNC_000044	XLOC_002472	-	Novel_lncRNA	GL893900.2:12519-17093	0.420997	1.56425	-1.89359	0.00045	0.00122529
ALDBSSCT0000006716	ALDBSSCG0000004095	-	Annotated_lncRNA	chr3:52224664-52230198	0.239707	1.58222	-2.72261	0.00045	0.00122529
ALDBSSCT0000007019	ALDBSSCG0000004268	-	Annotated_lncRNA	chr3:11422000-11425024	1.00598	1.58628	-0.657039	0.00245	0.00578974
ALDBSSCT0000005643	ALDBSSCG0000003421	-	Annotated_lncRNA	chr18:9679414-9684475	0.499951	1.60779	-1.68522	5e-05	0.000155633
ALDBSSCT0000000150	ALDBSSCG0000000087	-	Annotated_lncRNA	chr1:65444683-65448060	3.24244	1.62192	0.999375	5e-05	0.000155633
ALDBSSCT0000009377	ALDBSSCG0000005718	-	Annotated_lncRNA	chr6:58288393-58290134	0.909419	1.63438	-0.84573	0.00975	0.0200837
ALDBSSCT0000002237	ALDBSSCG0000001345	-	Annotated_lncRNA	chr12:37344338-37350558	7.05417	1.63458	2.10955	5e-05	0.000155633
ALDBSSCT0000012080	ALDBSSCG0000007367	-	Annotated_lncRNA	chrX:126642323-126650703	5.06678	1.64497	1.62301	0.00325	0.00747375
ALDBSSCT0000008954	ALDBSSCG0000005482	-	Annotated_lncRNA	chr6:81651842-81660219	3.37279	1.66109	1.02181	0.00015	0.000441639
ALDBSSCT0000005345	ALDBSSCG0000003234	-	Annotated_lncRNA	chr17:39606113-39608973	5.62204	1.66925	1.75189	0.00125	0.00313635
ALDBSSCT0000008221	ALDBSSCG0000004990	-	Annotated_lncRNA	chr4:143377359-143383392	1.2455	1.67158	-0.424495	0.0249	0.0461988
LNC_000306	XLOC_015612	-	Novel_lncRNA	chr10:29427590-29431217	0.317884	1.67274	-2.39564	0.0001	0.000300888
ALDBSSCT0000006138	ALDBSSCG0000003751	-	Annotated_lncRNA	chr2:3880158-3880641	0	1.68473	#NAME?	0.01045	0.0213639
LNC_000863	XLOC_047103	-	Novel_lncRNA	chr4:103593809-103608443	0.459984	1.68621	-1.87413	0.0003	0.000841218
ALDBSSCT0000011928	ALDBSSCG0000007260	-	Annotated_lncRNA	chrX:51200469-51338009	0.703716	1.70671	-1.27816	5e-05	0.000155633
LNC_001154	XLOC_066125	-	Novel_lncRNA	chr9:40317590-40364190	0.506805	1.71295	-1.75698	5e-05	0.000155633
ALDBSSCT0000009906	ALDBSSCG0000006029	-	Annotated_lncRNA	chr7:106107552-106112169	2.50605	1.72909	0.535401	0.0127	0.0254312
ALDBSSCT0000005153	ALDBSSCG0000003108	-	Annotated_lncRNA	chr17:36964087-36974780	2.62694	1.73141	0.601431	5e-05	0.000155633
ALDBSSCT0000001235	ALDBSSCG0000000751	-	Annotated_lncRNA	chr10:44063582-44076628	4.15034	1.73192	1.26086	5e-05	0.000155633
ALDBSSCT0000002102	ALDBSSCG0000001264	-	Annotated_lncRNA	chr11:87014584-87016789	3.34239	1.73221	0.94826	5e-05	0.000155633
LNC_000052	XLOC_002790	-	Novel_lncRNA	GL894050.2:10593-18072	4.56308	1.7337	1.39615	0.00235	0.00557322
ALDBSSCT0000004368	ALDBSSCG0000002649	-	Annotated_lncRNA	chr15:152405022-152412240	1.19215	1.73519	-0.541531	0.0034	0.00778878
ALDBSSCT0000006136	ALDBSSCG0000003750	-	Annotated_lncRNA	chr2:3570505-3575321	1.09521	1.74643	-0.673206	0.02435	0.045347
LNC_000054	XLOC_002859	-	Novel_lncRNA	GL894083.2:4638-22371	0.548355	1.75348	-1.67704	0.0103	0.0210933
ALDBSSCT0000008838	ALDBSSCG0000005399	-	Annotated_lncRNA	chr6:46563182-46604364	1.10621	1.76274	-0.67219	0.02545	0.0470879
LNC_000310	XLOC_015882	-	Novel_lncRNA	chr10:52901108-52919695	2.98547	1.76708	0.756588	0.0185	0.035612
LNC_000770	XLOC_041492	-	Novel_lncRNA	chr2:98746734-98751470	0.916988	1.78455	-0.960585	5e-05	0.000155633
LNC_000828	XLOC_044587	-	Novel_lncRNA	chr3:34096594-34107178	1.28599	1.78616	-0.473978	0.006	0.0130098
LNC_000149	XLOC_007591	-	Novel_lncRNA	JH118856.1:46554-56510	3.8788	1.79565	1.1111	0.0001	0.000300888
LNC_000241	XLOC_012533	-	Novel_lncRNA	chr1:146049799-146057577	1.09483	1.81139	-0.726391	5e-05	0.000155633
ALDBSSCT0000006556	ALDBSSCG0000004004	-	Annotated_lncRNA	chr3:9631702-9639958	0.419093	1.83251	-2.12848	0.0005	0.00135038
LNC_000632	XLOC_031582	-	Novel_lncRNA	chr15:104366484-104503541	4.05027	1.83765	1.14016	0.0163	0.0318204
ALDBSSCT0000011475	ALDBSSCG0000006983	-	Annotated_lncRNA	chr9:32373824-32375617	3.6118	1.8381	0.974498	5e-05	0.000155633
ALDBSSCT0000010172	ALDBSSCG0000006195	-	Annotated_lncRNA	chr7:60624570-60647062	0.891336	1.85421	-1.05676	0.002	0.00481179
LNC_000699	XLOC_035093	-	Novel_lncRNA	chr17:35126911-35137240	1.28617	1.86171	-0.533546	0.00185	0.00448152
LNC_000928	XLOC_050931	-	Novel_lncRNA	chr5:3366218-3367472	0.497069	1.88637	-1.92409	0.00045	0.00122529
LNC_000121	XLOC_005775	-	Novel_lncRNA	GL896293.1:514-2508	0.784116	1.90095	-1.27758	0.0047	0.0104457
ALDBSSCT0000012041	ALDBSSCG0000007340	-	Annotated_lncRNA	chrX:68862691-68870587	2.71073	1.90276	0.510586	0.0022	0.00524588
ALDBSSCT0000007092	ALDBSSCG0000004311	-	Annotated_lncRNA	chr3:34638449-34639357	0.28363	1.93646	-2.77134	0.00575	0.0125312
ALDBSSCT0000010059	ALDBSSCG0000006120	-	Annotated_lncRNA	chr7:13056634-13321227	3.97228	1.94207	1.03237	0.00055	0.00147609
ALDBSSCT0000002005	ALDBSSCG0000001208	-	Annotated_lncRNA	chr11:56948525-56949898	1.03794	1.94617	-0.906917	0.0079	0.0166785
ALDBSSCT0000007423	ALDBSSCG0000004498	-	Annotated_lncRNA	chr4:6694716-6700193	0	1.95198	#NAME?	0.0264	0.0486302
ALDBSSCT0000007152	ALDBSSCG0000004349	-	Annotated_lncRNA	chr3:48612333-48633134	0.817797	1.98977	-1.28279	0.0032	0.00737293
LNC_000657	XLOC_032761	-	Novel_lncRNA	chr16:57502979-57558818	13.2695	1.99559	2.73323	5e-05	0.000155633
LNC_000765	XLOC_040998	-	Novel_lncRNA	chr2:70798776-70817443	0.942523	1.99907	-1.08473	0.0221	0.041636
LNC_000595	XLOC_029241	-	Novel_lncRNA	chr15:38703818-38717552	2.59213	2.02173	0.358549	0.01445	0.0286006
ALDBSSCT0000003875	ALDBSSCG0000002329	-	Annotated_lncRNA	chr14:43838211-43842012	0.536528	2.02349	-1.91512	0.00075	0.00196127
ALDBSSCT0000010369	ALDBSSCG0000006298	-	Annotated_lncRNA	chr7:131387858-131389321	1.07127	2.04031	-0.929461	0.00635	0.0137009
LNC_000747	XLOC_039462	-	Novel_lncRNA	chr2:146219457-146224947	2.81766	2.05102	0.458155	0.0145	0.0286901
ALDBSSCT0000006659	ALDBSSCG0000004072	-	Annotated_lncRNA	chr3:40597415-40602602	3.32934	2.08829	0.67291	0.0226	0.0424622
LNC_000951	XLOC_052499	-	Novel_lncRNA	chr6:17757777-17761496	4.66187	2.0953	1.15375	0.0002	0.000578608
ALDBSSCT0000000584	ALDBSSCG0000000349	-	Annotated_lncRNA	chr1:314141523-314143569	0.691622	2.10608	-1.60651	5e-05	0.000155633
LNC_000108	XLOC_005479	-	Novel_lncRNA	GL896210.1:1508-3682	1.12902	2.11194	-0.903502	0.01465	0.0289359
ALDBSSCT0000004414	ALDBSSCG0000002688	-	Annotated_lncRNA	chr15:36230004-36234763	0.902855	2.11856	-1.23052	5e-05	0.000155633
ALDBSSCT0000006190	ALDBSSCG0000003784	-	Annotated_lncRNA	chr2:17593046-17599172	0.625677	2.12067	-1.76103	0.00035	0.000971111
ALDBSSCT0000008879	ALDBSSCG0000005426	-	Annotated_lncRNA	chr6:54602686-54608819	1.21627	2.12275	-0.803467	0.001	0.00255986
ALDBSSCT0000004015	ALDBSSCG0000002419	-	Annotated_lncRNA	chr14:104866222-104889684	3.3097	2.14567	0.625268	0.02245	0.042198
ALDBSSCT0000008921	ALDBSSCG0000005453	-	Annotated_lncRNA	chr6:64595122-64595908	3.85174	2.15055	0.840801	0.005	0.0110347
ALDBSSCT0000006840	ALDBSSCG0000004170	-	Annotated_lncRNA	chr3:117293999-117302330	1.11485	2.15538	-0.951089	0.01135	0.0229763
ALDBSSCT0000011077	ALDBSSCG0000006721	-	Annotated_lncRNA	chr9:10099105-10103058	2.89552	2.1795	0.409824	0.01765	0.0341773
LNC_000915	XLOC_049664	-	Novel_lncRNA	chr5:7762990-7764807	0.893438	2.18052	-1.28723	0.00055	0.00147609
ALDBSSCT0000004352	ALDBSSCG0000002638	-	Annotated_lncRNA	chr15:147200873-147223254	4.26785	2.18511	0.965801	0.0007	0.00184205
LNC_000475	XLOC_023194	-	Novel_lncRNA	chr13:33239266-33243868	3.4432	2.21331	0.637546	0.00065	0.00172234
ALDBSSCT0000003947	ALDBSSCG0000002378	-	Annotated_lncRNA	chr14:69000515-69222309	0.722877	2.22152	-1.61972	0.0012	0.00302103
ALDBSSCT0000001091	ALDBSSCG0000000675	-	Annotated_lncRNA	chr1:313791076-313792321	5.24678	2.23191	1.23316	5e-05	0.000155633
LNC_000582	XLOC_028713	-	Novel_lncRNA	chr14:131750073-131791014	5.09481	2.25339	1.17693	0.00025	0.000710668
LNC_000710	XLOC_036383	-	Novel_lncRNA	chr18:3181502-3183463	0.932928	2.25399	-1.27264	5e-05	0.000155633
LNC_000132	XLOC_006432	-	Novel_lncRNA	GL896503.1:11368-22270	4.18216	2.27202	0.880275	0.0241	0.0449513
ALDBSSCT0000001049	ALDBSSCG0000000650	-	Annotated_lncRNA	chr1:293388717-293419671	0.483627	2.29312	-2.24535	0.00045	0.00122529
LNC_000913	XLOC_049591	-	Novel_lncRNA	chr5:5278099-5282680	3.10646	2.3049	0.430566	0.0255	0.0471561
LNC_000940	XLOC_052095	-	Novel_lncRNA	chr5:93737169-93763197	1.75729	2.30906	-0.393957	0.0127	0.0254312
ALDBSSCT0000010174	ALDBSSCG0000006197	-	Annotated_lncRNA	chr7:61955262-61956016	13.6015	2.34909	2.5336	5e-05	0.000155633
ALDBSSCT0000003196	ALDBSSCG0000001926	-	Annotated_lncRNA	chr13:79212398-79213825	0.478397	2.35057	-2.29673	0.01575	0.0308608
LNC_000107	XLOC_005341	-	Novel_lncRNA	GL896148.1:16209-19109	0	2.35769	#NAME?	5e-05	0.000155633
LNC_000988	XLOC_055602	-	Novel_lncRNA	chr6:62350602-62363641	0.68962	2.37923	-1.78662	5e-05	0.000155633
ALDBSSCT0000006308	ALDBSSCG0000003857	-	Annotated_lncRNA	chr2:65442320-65447759	0.802591	2.39709	-1.57855	0.00045	0.00122529
ALDBSSCT0000003469	ALDBSSCG0000002090	-	Annotated_lncRNA	chr14:11546783-11558416	1.03585	2.41222	-1.21955	0.0004	0.00109881
ALDBSSCT0000001898	ALDBSSCG0000001148	-	Annotated_lncRNA	chr11:9634285-9635495	5.28098	2.42724	1.12149	5e-05	0.000155633
ALDBSSCT0000000326	ALDBSSCG0000000190	-	Annotated_lncRNA	chr1:163117060-163154667	0	2.43086	#NAME?	5e-05	0.000155633
LNC_000013	XLOC_000631	-	Novel_lncRNA	GL892730.2:182420-194612	3.54892	2.44265	0.538936	0.016	0.0312688
ALDBSSCT0000010618	ALDBSSCG0000006441	-	Annotated_lncRNA	chr8:119934738-119950298	1.88714	2.44737	-0.375034	0.0241	0.0449513
ALDBSSCT0000005180	ALDBSSCG0000003126	-	Annotated_lncRNA	chr17:47214003-47215890	3.8239	2.45988	0.636455	0.0174	0.0337404
LNC_000023	XLOC_001028	-	Novel_lncRNA	GL893033.1:11623-13596	1.17156	2.4796	-1.08167	0.02635	0.048548
ALDBSSCT0000010092	ALDBSSCG0000006144	-	Annotated_lncRNA	chr7:26691564-26694519	3.46067	2.52875	0.452623	0.009	0.0186975
LNC_000719	XLOC_037046	-	Novel_lncRNA	chr18:53532066-53538517	5.01197	2.52995	0.986268	5e-05	0.000155633
LNC_000675	XLOC_033589	-	Novel_lncRNA	chr16:60141432-60160744	1.75665	2.56242	-0.544676	5e-05	0.000155633
ALDBSSCT0000011986	ALDBSSCG0000007296	-	Annotated_lncRNA	chrX:139227602-139229821	1.2232	2.58095	-1.07724	0.0116	0.023427
ALDBSSCT0000011083	ALDBSSCG0000006725	-	Annotated_lncRNA	chr9:10956024-10964155	0	2.6379	#NAME?	0.0005	0.00135038
ALDBSSCT0000009147	ALDBSSCG0000005576	-	Annotated_lncRNA	chr6:147804750-147834388	32.2507	2.65025	3.60513	0.0002	0.000578608
ALDBSSCT0000002608	ALDBSSCG0000001586	-	Annotated_lncRNA	chr13:33028642-33029672	0.561899	2.67596	-2.25167	0.00145	0.00359101
ALDBSSCT0000006558	ALDBSSCG0000004004	-	Annotated_lncRNA	chr3:9631702-9639958	0.678632	2.69663	-1.99045	5e-05	0.000155633
ALDBSSCT0000007110	ALDBSSCG0000004326	-	Annotated_lncRNA	chr3:40145453-40147223	1.44513	2.71487	-0.909685	0.00385	0.00871955
LNC_000703	XLOC_035528	-	Novel_lncRNA	chr17:58659125-58664215	9.52868	2.71686	1.81033	5e-05	0.000155633
ALDBSSCT0000005086	ALDBSSCG0000003065	-	Annotated_lncRNA	chr16:82411092-82413437	0	2.73083	#NAME?	0.00935	0.0193419
ALDBSSCT0000007114	ALDBSSCG0000004330	-	Annotated_lncRNA	chr3:40884941-40888371	0.931226	2.73355	-1.55357	0.00035	0.000971111
ALDBSSCT0000006348	ALDBSSCG0000003883	-	Annotated_lncRNA	chr2:84651320-84655149	1.00605	2.79009	-1.47161	5e-05	0.000155633
ALDBSSCT0000002219	ALDBSSCG0000001332	-	Annotated_lncRNA	chr12:24884117-24888554	0.83215	2.79742	-1.74918	5e-05	0.000155633
ALDBSSCT0000000301	ALDBSSCG0000000174	-	Annotated_lncRNA	chr1:146324884-146334352	7.1814	2.86734	1.32455	5e-05	0.000155633
LNC_000517	XLOC_025333	-	Novel_lncRNA	chr13:216909750-216919237	1.18851	2.88383	-1.27883	5e-05	0.000155633
ALDBSSCT0000003473	ALDBSSCG0000002094	-	Annotated_lncRNA	chr14:15781823-15796541	6.21169	2.91961	1.08921	5e-05	0.000155633
ALDBSSCT0000009787	ALDBSSCG0000005967	-	Annotated_lncRNA	chr7:57689136-57742344	5.0486	2.92908	0.785435	0.0073	0.0155268
LNC_000243	XLOC_012660	-	Novel_lncRNA	chr1:157771430-157783285	9.10351	2.93659	1.63228	0.00025	0.000710668
ALDBSSCT0000000773	ALDBSSCG0000000466	-	Annotated_lncRNA	chr1:103294373-103334163	1.15399	2.94429	-1.35129	0.0002	0.000578608
ALDBSSCT0000000236	ALDBSSCG0000000136	-	Annotated_lncRNA	chr1:120407029-120411718	0.201674	2.96474	-3.87781	0.0013	0.00325226
ALDBSSCT0000006544	ALDBSSCG0000004000	-	Annotated_lncRNA	chr3:6572300-6573154	0.67552	2.96702	-2.13494	0.01115	0.0226301
ALDBSSCT0000009611	ALDBSSCG0000005862	-	Annotated_lncRNA	chr7:2440657-2441802	1.31621	2.97471	-1.17635	0.0032	0.00737293
LNC_000726	XLOC_038010	-	Novel_lncRNA	chr2:52579458-52582871	3.94018	3.00496	0.390914	0.01075	0.0219099
LNC_000645	XLOC_032345	-	Novel_lncRNA	chr16:22729628-22784889	0.582757	3.05643	-2.39088	0.0153	0.0300841
ALDBSSCT0000002898	ALDBSSCG0000001753	-	Annotated_lncRNA	chr13:169117135-169133256	1.58341	3.08698	-0.963159	0.0001	0.000300888
LNC_001050	XLOC_060361	-	Novel_lncRNA	chr7:105515719-105541500	1.5688	3.0992	-0.982233	0.0271	0.0497868
ALDBSSCT0000007403	ALDBSSCG0000004487	-	Annotated_lncRNA	chr4:187014-193797	1.97687	3.15194	-0.673021	0.00685	0.0146617
ALDBSSCT0000005145	ALDBSSCG0000003100	-	Annotated_lncRNA	chr17:31315684-31364884	0	3.16395	#NAME?	0.0012	0.00302103
ALDBSSCT0000001944	ALDBSSCG0000001172	-	Annotated_lncRNA	chr11:18603508-18612838	4.71422	3.16888	0.573045	0.0003	0.000841218
ALDBSSCT0000007178	ALDBSSCG0000004363	-	Annotated_lncRNA	chr3:59512426-59513326	5.47492	3.18651	0.78086	0.00105	0.00267641
ENSSSCT00000035380	ENSSSCG00000031004	CH242-227G20.3	Annotated_lncRNA	chrX:22075080-22076913	1.45043	3.20711	-1.1448	5e-05	0.000155633
ENSSSCT00000017310	ENSSSCG00000015897	IFIH1	Annotated_lncRNA	chr15:76423088-76477401	59.7716	3.21174	4.21803	5e-05	0.000155633
LNC_000158	XLOC_007822	-	Novel_lncRNA	JH118968.1:80408-100149	0.544993	3.21548	-2.56072	0.001	0.00255986
ALDBSSCT0000002430	ALDBSSCG0000001471	-	Annotated_lncRNA	chr12:38344989-38356842	1.70541	3.24648	-0.928759	0.001	0.00255986
LNC_000677	XLOC_033709	-	Novel_lncRNA	chr16:77584675-77594772	1.11245	3.24754	-1.54561	5e-05	0.000155633
LNC_000127	XLOC_006107	-	Novel_lncRNA	GL896391.1:6604-7788	0.766194	3.26902	-2.09308	0.0051	0.0112346
ALDBSSCT0000000518	ALDBSSCG0000000304	-	Annotated_lncRNA	chr1:281952665-281953565	6.28351	3.2901	0.933438	0.0002	0.000578608
ALDBSSCT0000004544	ALDBSSCG0000002762	-	Annotated_lncRNA	chr15:94610938-94611392	13.4183	3.3239	2.01325	0.00065	0.00172234
ALDBSSCT0000001171	ALDBSSCG0000000724	-	Annotated_lncRNA	chr10:27921582-27926499	8.2678	3.33344	1.31049	5e-05	0.000155633
ALDBSSCT0000000247	ALDBSSCG0000000144	-	Annotated_lncRNA	chr1:124942919-124944948	1.8353	3.34222	-0.864791	0.01945	0.0372134
LNC_000326	XLOC_016120	-	Novel_lncRNA	chr10:72935165-72944311	7.58612	3.35893	1.17536	5e-05	0.000155633
LNC_000182	XLOC_008997	-	Novel_lncRNA	chr1:120202748-120208785	1.30867	3.38252	-1.37	5e-05	0.000155633
ALDBSSCT0000010864	ALDBSSCG0000006581	-	Annotated_lncRNA	chr8:58014702-58019820	5.69487	3.39914	0.744494	5e-05	0.000155633
ALDBSSCT0000008426	ALDBSSCG0000005114	-	Annotated_lncRNA	chr5:91840838-91872548	1.94455	3.40221	-0.807034	0.0136	0.0270854
ALDBSSCT0000011947	ALDBSSCG0000007270	-	Annotated_lncRNA	chrX:74286043-74353549	1.62948	3.43599	-1.07631	0.0165	0.0321759
ALDBSSCT0000001092	ALDBSSCG0000000676	-	Annotated_lncRNA	chr1:313901305-313904435	0.442178	3.44013	-2.95976	5e-05	0.000155633
ALDBSSCT0000002108	ALDBSSCG0000001267	-	Annotated_lncRNA	chr12:686794-772840	2.00167	3.45738	-0.788477	0.0188	0.0361237
ALDBSSCT0000004377	ALDBSSCG0000002657	-	Annotated_lncRNA	chr15:157445357-157447780	0	3.46082	#NAME?	0.0022	0.00524588
LNC_001040	XLOC_059498	-	Novel_lncRNA	chr7:43767870-43771473	1.48707	3.46345	-1.21974	5e-05	0.000155633
LNC_000711	XLOC_036462	-	Novel_lncRNA	chr18:8694930-8696468	9.15558	3.47797	1.39641	0.0118	0.0237854
ALDBSSCT0000009328	ALDBSSCG0000005688	-	Annotated_lncRNA	chr6:47019231-47023895	43.4457	3.663	3.56811	5e-05	0.000155633
LNC_001103	XLOC_063395	-	Novel_lncRNA	chr8:127590946-127615930	13.1504	3.71592	1.82331	5e-05	0.000155633
ALDBSSCT0000004775	ALDBSSCG0000002906	-	Annotated_lncRNA	chr16:42882797-42946220	2.16451	3.72324	-0.782519	0.0158	0.0309419
ALDBSSCT0000001112	ALDBSSCG0000000691	-	Annotated_lncRNA	chr10:10132510-10137175	2.13546	3.72482	-0.802621	0.00015	0.000441639
LNC_001042	XLOC_059631	-	Novel_lncRNA	chr7:52597753-52603768	0	3.76321	#NAME?	0.0001	0.000300888
ALDBSSCT0000011173	ALDBSSCG0000006783	-	Annotated_lncRNA	chr9:51592747-51594606	0	3.77988	#NAME?	0.00265	0.00621819
LNC_000979	XLOC_054964	-	Novel_lncRNA	chr6:37987772-37992663	9.79052	3.78384	1.37154	0.00015	0.000441639
ALDBSSCT0000004527	ALDBSSCG0000002755	-	Annotated_lncRNA	chr15:91443325-91446756	1.84681	3.78877	-1.03669	5e-05	0.000155633
ALDBSSCT0000007999	ALDBSSCG0000004852	-	Annotated_lncRNA	chr4:81625845-81656141	14.0522	3.8071	1.88403	0.00045	0.00122529
ALDBSSCT0000007183	ALDBSSCG0000004367	-	Annotated_lncRNA	chr3:62748410-62749385	1.9225	3.80943	-0.986586	0.02375	0.0443722
ALDBSSCT0000003416	ALDBSSCG0000002055	-	Annotated_lncRNA	chr13:210988724-210991362	2.52516	3.81387	-0.594881	0.00055	0.00147609
ALDBSSCT0000007748	ALDBSSCG0000004701	-	Annotated_lncRNA	chr4:137048912-137059041	1.69391	3.84971	-1.18439	5e-05	0.000155633
ALDBSSCT0000009664	ALDBSSCG0000005898	-	Annotated_lncRNA	chr7:17908767-18326695	7.95817	3.85347	1.04628	5e-05	0.000155633
LNC_001101	XLOC_063368	-	Novel_lncRNA	chr8:124114842-124124977	2.73847	3.86918	-0.498657	0.0001	0.000300888
LNC_001070	XLOC_061980	-	Novel_lncRNA	chr8:141584071-141585421	2.25897	3.90704	-0.790409	0.00145	0.00359101
ALDBSSCT0000008257	ALDBSSCG0000005010	-	Annotated_lncRNA	chr5:7737473-7741619	1.61178	3.92008	-1.28223	0.0001	0.000300888
ALDBSSCT0000001791	ALDBSSCG0000001082	-	Annotated_lncRNA	chr11:73458737-73461151	7.17114	3.92448	0.869702	5e-05	0.000155633
ALDBSSCT0000003885	ALDBSSCG0000002336	-	Annotated_lncRNA	chr14:45936744-45938551	1.43235	3.93175	-1.45679	5e-05	0.000155633
LNC_000734	XLOC_038774	-	Novel_lncRNA	chr2:89813421-89820430	6.36839	3.97473	0.680072	5e-05	0.000155633
ENSSSCT00000033840	ENSSSCG00000017791	SSH2	Annotated_lncRNA	chr12:47804245-47871712	5.95142	4.0188	0.56647	5e-05	0.000155633
ALDBSSCT0000001056	ALDBSSCG0000000651	-	Annotated_lncRNA	chr1:293507082-293508684	5.938	4.09458	0.536262	0.00595	0.0129107
ALDBSSCT0000006247	ALDBSSCG0000003814	-	Annotated_lncRNA	chr2:30848583-30849708	8.82917	4.11854	1.10014	5e-05	0.000155633
LNC_000541	XLOC_027017	-	Novel_lncRNA	chr14:139298402-139304159	0.928922	4.16846	-2.16589	5e-05	0.000155633
LNC_001138	XLOC_065442	-	Novel_lncRNA	chr9:146288283-146299314	1.08549	4.23323	-1.96342	0.0258	0.0476422
LNC_000884	XLOC_047804	-	Novel_lncRNA	chr4:12468886-12732532	8.77545	4.28827	1.03308	0.001	0.00255986
LNC_000409	XLOC_019362	-	Novel_lncRNA	chr12:18368271-18391321	1.7104	4.31136	-1.33381	5e-05	0.000155633
ALDBSSCT0000000420	ALDBSSCG0000000248	-	Annotated_lncRNA	chr1:212183974-212186249	2.57416	4.34881	-0.75652	0.00055	0.00147609
LNC_000932	XLOC_051083	-	Novel_lncRNA	chr5:12017206-12018391	11.3069	4.41972	1.35518	5e-05	0.000155633
ALDBSSCT0000011428	ALDBSSCG0000006950	-	Annotated_lncRNA	chr9:8096731-8099417	2.88739	4.44703	-0.623073	0.00045	0.00122529
ALDBSSCT0000007057	ALDBSSCG0000004290	-	Annotated_lncRNA	chr3:22227016-22233489	2.79574	4.46705	-0.676093	0.0083	0.0174125
ALDBSSCT0000007409	ALDBSSCG0000004489	-	Annotated_lncRNA	chr4:998207-1005683	2.90565	4.49739	-0.630227	5e-05	0.000155633
ALDBSSCT0000009487	ALDBSSCG0000005786	-	Annotated_lncRNA	chr6:100800214-100815026	6.14843	4.51076	0.446845	0.0018	0.00437574
ALDBSSCT0000011925	ALDBSSCG0000007258	-	Annotated_lncRNA	chrX:47051660-47052166	13.2916	4.5141	1.558	0.0159	0.0311038
LNC_001121	XLOC_064934	-	Novel_lncRNA	chr9:99820677-99828068	6.82505	4.53399	0.590057	5e-05	0.000155633
ALDBSSCT0000007166	ALDBSSCG0000004354	-	Annotated_lncRNA	chr3:51850717-51853752	3.41576	4.55986	-0.416781	0.0111	0.0225363
LNC_000752	XLOC_039787	-	Novel_lncRNA	chr2:2566029-2572458	8.59974	4.66008	0.883938	5e-05	0.000155633
ALDBSSCT0000002468	ALDBSSCG0000001493	-	Annotated_lncRNA	chr12:46119845-46120630	8.83439	4.6615	0.922336	5e-05	0.000155633
ALDBSSCT0000000988	ALDBSSCG0000000606	-	Annotated_lncRNA	chr1:256190559-256198757	12.5072	4.68502	1.41663	0.01315	0.0262561
ALDBSSCT0000005568	ALDBSSCG0000003370	-	Annotated_lncRNA	chr18:53402437-53422408	14.7426	4.70906	1.64648	5e-05	0.000155633
LNC_000089	XLOC_004423	-	Novel_lncRNA	GL895275.1:7571-20644	17.5847	4.71037	1.90041	5e-05	0.000155633
LNC_000823	XLOC_044236	-	Novel_lncRNA	chr3:7924644-7925949	2.47153	4.71392	-0.931522	0.0001	0.000300888
ALDBSSCT0000007814	ALDBSSCG0000004731	-	Annotated_lncRNA	chr4:143207103-143207986	2.72163	4.81974	-0.824484	0.00725	0.0154296
LNC_000402	XLOC_018832	-	Novel_lncRNA	chr12:54703594-54704942	7.01225	4.89684	0.518027	0.0057	0.0124359
ALDBSSCT0000005260	ALDBSSCG0000003173	-	Annotated_lncRNA	chr17:67415360-67417833	3.73425	4.92525	-0.399379	0.02055	0.0390641
ALDBSSCT0000003426	ALDBSSCG0000002064	-	Annotated_lncRNA	chr13:213487576-213492982	1.83443	4.96411	-1.4362	5e-05	0.000155633
ALDBSSCT0000002327	ALDBSSCG0000001405	-	Annotated_lncRNA	chr12:952106-957120	3.74744	5.0024	-0.416714	0.003	0.00695136
ALDBSSCT0000007495	ALDBSSCG0000004545	-	Annotated_lncRNA	chr4:32901089-33026978	3.18783	5.04999	-0.663703	0.004	0.00902966
ALDBSSCT0000000560	ALDBSSCG0000000331	-	Annotated_lncRNA	chr1:304146271-304173254	2.66296	5.0715	-0.929379	0.0146	0.0288562
ALDBSSCT0000008870	ALDBSSCG0000005420	-	Annotated_lncRNA	chr6:52055850-52063194	12.1919	5.10113	1.25703	0.0024	0.0056813
ALDBSSCT0000001873	ALDBSSCG0000001134	-	Annotated_lncRNA	chr11:5163848-5173221	3.60906	5.19303	-0.524954	0.00115	0.00290779
ALDBSSCT0000011956	ALDBSSCG0000007276	-	Annotated_lncRNA	chrX:98830978-98831537	0.969696	5.19366	-2.42115	0.0186	0.0357738
ALDBSSCT0000003873	ALDBSSCG0000002328	-	Annotated_lncRNA	chr14:43461326-43469028	12.3839	5.21451	1.24786	5e-05	0.000155633
ALDBSSCT0000005490	ALDBSSCG0000003328	-	Annotated_lncRNA	chr18:25494987-25497863	3.46523	5.26613	-0.60379	0.00025	0.000710668
ALDBSSCT0000011141	ALDBSSCG0000006758	-	Annotated_lncRNA	chr9:34636585-34856669	0	5.29968	#NAME?	0.00485	0.0107445
LNC_000301	XLOC_015103	-	Novel_lncRNA	chr10:78714004-78720258	3.5125	5.32546	-0.600407	0.00315	0.00727172
LNC_000060	XLOC_003198	-	Novel_lncRNA	GL894272.1:18732-65239	10.6581	5.33879	0.997364	0.0181	0.0349206
ALDBSSCT0000003280	ALDBSSCG0000001977	-	Annotated_lncRNA	chr13:134107917-134148028	7.59125	5.40217	0.490799	0.01435	0.0284403
ALDBSSCT0000007276	ALDBSSCG0000004410	-	Annotated_lncRNA	chr3:100972900-100973519	2.25872	5.44764	-1.27013	0.0179	0.0345756
ALDBSSCT0000007308	ALDBSSCG0000004435	-	Annotated_lncRNA	chr3:117293999-117302330	4.06208	5.47959	-0.431849	0.0113	0.0228854
LNC_001173	XLOC_068374	-	Novel_lncRNA	chrX:143696241-143699146	2.13554	5.49342	-1.3631	5e-05	0.000155633
LNC_000542	XLOC_027017	-	Novel_lncRNA	chr14:139298402-139304159	0.890916	5.51098	-2.62895	5e-05	0.000155633
ALDBSSCT0000007171	ALDBSSCG0000004358	-	Annotated_lncRNA	chr3:54764200-54821564	18.7744	5.5182	1.7665	5e-05	0.000155633
ALDBSSCT0000009479	ALDBSSCG0000005780	-	Annotated_lncRNA	chr6:97634442-97650721	8.37145	5.52364	0.599857	5e-05	0.000155633
ALDBSSCT0000009181	ALDBSSCG0000005593	-	Annotated_lncRNA	chr6:156127453-156128279	1.96422	5.57806	-1.5058	0.0002	0.000578608
ALDBSSCT0000006004	ALDBSSCG0000003669	-	Annotated_lncRNA	chr2:122403734-122491639	2.09232	5.60117	-1.42062	0.00015	0.000441639
ALDBSSCT0000007056	ALDBSSCG0000004290	-	Annotated_lncRNA	chr3:22227016-22233489	3.85661	5.62026	-0.543302	0.0049	0.0108433
LNC_000228	XLOC_011932	-	Novel_lncRNA	chr1:84643889-84709541	1.54973	5.63452	-1.86227	0.00265	0.00621819
ALDBSSCT0000010016	ALDBSSCG0000006091	-	Annotated_lncRNA	chr7:3173961-3184714	3.19835	5.69758	-0.833021	5e-05	0.000155633
ALDBSSCT0000008100	ALDBSSCG0000004915	-	Annotated_lncRNA	chr4:113095856-113096844	1.18391	5.82394	-2.29844	5e-05	0.000155633
ENSSSCT00000027578	ENSSSCG00000026924	KIFC2	Annotated_lncRNA	chr4:415602-422897	2.75845	5.83081	-1.07984	0.0006	0.00159881
ALDBSSCT0000011858	ALDBSSCG0000007205	-	Annotated_lncRNA	GL896456.1:29941-44725	9.99524	5.8419	0.774804	0.0002	0.000578608
ALDBSSCT0000008833	ALDBSSCG0000005395	-	Annotated_lncRNA	chr6:44781587-44782741	3.42668	5.90159	-0.784293	0.00025	0.000710668
ALDBSSCT0000006169	ALDBSSCG0000003772	-	Annotated_lncRNA	chr2:10369905-10372289	2.47492	6.01295	-1.28069	5e-05	0.000155633
LNC_000606	XLOC_029471	-	Novel_lncRNA	chr15:53661930-53687829	12.5372	6.04375	1.0527	5e-05	0.000155633
LNC_000891	XLOC_048145	-	Novel_lncRNA	chr4:37179774-37185404	3.80484	6.10651	-0.682513	5e-05	0.000155633
LNC_000954	XLOC_052863	-	Novel_lncRNA	chr6:43276370-43278294	2.87299	6.10653	-1.0878	0.0013	0.00325226
ALDBSSCT0000011174	ALDBSSCG0000006784	-	Annotated_lncRNA	chr9:51655581-51670383	1.98441	6.1918	-1.64165	5e-05	0.000155633
ALDBSSCT0000001996	ALDBSSCG0000001205	-	Annotated_lncRNA	chr11:56092170-56096454	12.8078	6.25077	1.03491	5e-05	0.000155633
LNC_000129	XLOC_006209	-	Novel_lncRNA	GL896427.1:735-3616	3.83043	6.3011	-0.718097	0.0002	0.000578608
ALDBSSCT0000010629	ALDBSSCG0000006449	-	Annotated_lncRNA	chr8:124241020-124242292	4.38083	6.34406	-0.534203	0.00385	0.00871955
ALDBSSCT0000003250	ALDBSSCG0000001959	-	Annotated_lncRNA	chr13:120032422-120034875	4.84058	6.3498	-0.391532	0.01495	0.0294766
ALDBSSCT0000002218	ALDBSSCG0000001331	-	Annotated_lncRNA	chr12:24866947-24869670	2.35907	6.42142	-1.44467	0.00085	0.00220511
ALDBSSCT0000001413	ALDBSSCG0000000856	-	Annotated_lncRNA	chr10:13669070-13737338	25.7349	6.50496	1.98412	0.0247	0.0459036
ALDBSSCT0000009681	ALDBSSCG0000005907	-	Annotated_lncRNA	chr7:23062784-23070260	4.75206	6.56027	-0.465202	0.00185	0.00448152
ALDBSSCT0000000728	ALDBSSCG0000000434	-	Annotated_lncRNA	chr1:57834807-57839034	2.61541	6.587	-1.33259	5e-05	0.000155633
ALDBSSCT0000009903	ALDBSSCG0000006026	-	Annotated_lncRNA	chr7:105420590-105421475	13.3311	6.60733	1.01265	5e-05	0.000155633
LNC_000526	XLOC_026233	-	Novel_lncRNA	chr14:62312472-62332199	18.9273	6.65458	1.50805	0.0151	0.0297266
ALDBSSCT0000003610	ALDBSSCG0000002162	-	Annotated_lncRNA	chr14:60234395-60235722	9.14862	6.72514	0.44399	0.01205	0.024254
ALDBSSCT0000008165	ALDBSSCG0000004958	-	Annotated_lncRNA	chr4:134027536-134049160	2.68393	6.82352	-1.34617	0.00905	0.0187775
LNC_000899	XLOC_048595	-	Novel_lncRNA	chr4:90583665-90591619	9.33756	6.82997	0.451165	0.01355	0.0269948
LNC_001082	XLOC_062701	-	Novel_lncRNA	chr8:58763375-58775829	12.8768	6.83668	0.913409	5e-05	0.000155633
ALDBSSCT0000011853	ALDBSSCG0000007202	-	Annotated_lncRNA	GL896324.1:46203-47110	3.82405	6.97843	-0.867801	0.00035	0.000971111
LNC_000138	XLOC_006865	-	Novel_lncRNA	JH118514.1:55060-69106	11.5624	7.01251	0.72144	5e-05	0.000155633
ALDBSSCT0000010931	ALDBSSCG0000006631	-	Annotated_lncRNA	chr8:103683149-103684904	13.2098	7.08222	0.899335	5e-05	0.000155633
ALDBSSCT0000009564	ALDBSSCG0000005834	-	Annotated_lncRNA	chr6:148737497-148743720	3.90491	7.1657	-0.875817	0.0015	0.00370106
ALDBSSCT0000009186	ALDBSSCG0000005594	-	Annotated_lncRNA	chr6:156399132-156413422	4.67611	7.20217	-0.623124	5e-05	0.000155633
LNC_000307	XLOC_015616	-	Novel_lncRNA	chr10:29436532-29454819	1.92441	7.2042	-1.90442	5e-05	0.000155633
LNC_000714	XLOC_036905	-	Novel_lncRNA	chr18:41424738-41430953	11.598	7.33484	0.661038	5e-05	0.000155633
ALDBSSCT0000006747	ALDBSSCG0000004121	-	Annotated_lncRNA	chr3:71143024-71151623	19.1178	7.53703	1.34285	5e-05	0.000155633
LNC_001022	XLOC_057894	-	Novel_lncRNA	chr7:62956677-62971658	2.83846	7.58216	-1.4175	5e-05	0.000155633
ALDBSSCT0000009751	ALDBSSCG0000005949	-	Annotated_lncRNA	chr7:44762264-44765879	1.94827	7.58729	-1.96139	0.025	0.0463604
ALDBSSCT0000002034	ALDBSSCG0000001229	-	Annotated_lncRNA	chr11:76561510-76611190	4.74632	7.60627	-0.680382	0.00045	0.00122529
LNC_000975	XLOC_054552	-	Novel_lncRNA	chr6:1560878-1564329	13.7416	7.72103	0.831687	5e-05	0.000155633
ALDBSSCT0000011950	ALDBSSCG0000007272	-	Annotated_lncRNA	chrX:86697705-86698443	15.5515	7.73421	1.00773	5e-05	0.000155633
LNC_000115	XLOC_005550	-	Novel_lncRNA	GL896227.2:11023-24107	3.71149	7.78334	-1.06839	0.0132	0.0263472
ALDBSSCT0000003347	ALDBSSCG0000002013	-	Annotated_lncRNA	chr13:160470293-160477475	11.3779	7.93328	0.520242	5e-05	0.000155633
ALDBSSCT0000004285	ALDBSSCG0000002595	-	Annotated_lncRNA	chr15:116493489-116515827	11.1131	7.93869	0.485282	0.00635	0.0137009
ALDBSSCT0000006688	ALDBSSCG0000004086	-	Annotated_lncRNA	chr3:46620778-46786498	10.4077	7.98402	0.382462	0.0011	0.00278961
ALDBSSCT0000006605	ALDBSSCG0000004037	-	Annotated_lncRNA	chr3:25776843-25779795	4.87965	7.99748	-0.712768	0.00675	0.0144718
ALDBSSCT0000011936	ALDBSSCG0000007263	-	Annotated_lncRNA	chrX:55266277-55275391	1.98751	8.07495	-2.02249	5e-05	0.000155633
ALDBSSCT0000010952	ALDBSSCG0000006638	-	Annotated_lncRNA	chr8:109091961-109094082	3.44769	8.19233	-1.24864	5e-05	0.000155633
ENSSSCT00000035899	ENSSSCG00000004600	CH242-58J12.2	Annotated_lncRNA	chr1:126842174-127433537	21.1739	8.22113	1.36488	0.0112	0.0227136
ALDBSSCT0000011825	ALDBSSCG0000007180	-	Annotated_lncRNA	GL894574.1:67405-73081	28.5689	8.29074	1.78487	5e-05	0.000155633
ALDBSSCT0000010251	ALDBSSCG0000006234	-	Annotated_lncRNA	chr7:92003905-92018644	32.778	8.43086	1.95898	5e-05	0.000155633
LNC_000124	XLOC_005966	-	Novel_lncRNA	GL896348.1:34194-40396	6.2948	8.56874	-0.444923	0.0103	0.0210933
ALDBSSCT0000005051	ALDBSSCG0000003047	-	Annotated_lncRNA	chr16:74604893-74609511	6.20461	8.58708	-0.468826	0.00075	0.00196127
LNC_000668	XLOC_033234	-	Novel_lncRNA	chr16:29266467-29270094	5.35717	8.6782	-0.695924	5e-05	0.000155633
ALDBSSCT0000000678	ALDBSSCG0000000408	-	Annotated_lncRNA	chr1:31297847-31298556	4.98443	8.70275	-0.804042	0.0007	0.00184205
ALDBSSCT0000005819	ALDBSSCG0000003538	-	Annotated_lncRNA	chr2:16111641-16112999	2.33375	8.75488	-1.90744	5e-05	0.000155633
ALDBSSCT0000005664	ALDBSSCG0000003437	-	Annotated_lncRNA	chr18:21014026-21015932	21.7062	8.78511	1.30497	5e-05	0.000155633
ALDBSSCT0000007147	ALDBSSCG0000004347	-	Annotated_lncRNA	chr3:48147722-48150246	4.69481	8.80878	-0.907875	5e-05	0.000155633
ALDBSSCT0000002070	ALDBSSCG0000001246	-	Annotated_lncRNA	chr11:82951895-82952593	19.9678	8.8562	1.17292	5e-05	0.000155633
LNC_000556	XLOC_027610	-	Novel_lncRNA	chr14:43440449-43448507	6.32359	8.90205	-0.493395	0.0142	0.028171
ALDBSSCT0000005933	ALDBSSCG0000003624	-	Annotated_lncRNA	chr2:77839216-77840164	4.2053	9.07795	-1.11016	5e-05	0.000155633
ALDBSSCT0000001157	ALDBSSCG0000000716	-	Annotated_lncRNA	chr10:22597134-22603060	4.69443	9.08531	-0.952584	5e-05	0.000155633
ENSSSCT00000035929	ENSSSCG00000001727	TNFRSF21	Annotated_lncRNA	chr7:48679156-48748761	15.8092	9.09817	0.797118	5e-05	0.000155633
ALDBSSCT0000003606	ALDBSSCG0000002158	-	Annotated_lncRNA	chr14:53504967-53505821	6.71956	9.12058	-0.440759	0.02155	0.040698
ALDBSSCT0000000164	ALDBSSCG0000000099	-	Annotated_lncRNA	chr1:81720999-81726044	6.64121	9.21937	-0.473222	0.0127	0.0254312
ALDBSSCT0000005886	ALDBSSCG0000003588	-	Annotated_lncRNA	chr2:51984529-52003458	2.58475	9.45296	-1.87074	0.0027	0.00632229
ALDBSSCT0000004915	ALDBSSCG0000002980	-	Annotated_lncRNA	chr16:29270215-29272597	6.46077	9.46773	-0.551312	0.0005	0.00135038
LNC_000354	XLOC_017220	-	Novel_lncRNA	chr11:14709960-14710645	4.45771	9.47688	-1.08811	0.0001	0.000300888
LNC_000697	XLOC_034766	-	Novel_lncRNA	chr17:2613468-2655813	14.4269	9.63355	0.582618	0.00205	0.00492153
LNC_000720	XLOC_037501	-	Novel_lncRNA	chr2:11892708-11898894	6.04555	9.65964	-0.676097	0.0001	0.000300888
ALDBSSCT0000005588	ALDBSSCG0000003380	-	Annotated_lncRNA	chr18:56115318-56192888	5.62339	9.71826	-0.789259	0.00185	0.00448152
ALDBSSCT0000002964	ALDBSSCG0000001783	-	Annotated_lncRNA	chr13:200136360-200140268	5.38283	9.83199	-0.869119	0.0001	0.000300888
ALDBSSCT0000000232	ALDBSSCG0000000133	-	Annotated_lncRNA	chr1:117531972-117628107	6.59395	9.96095	-0.59514	0.0004	0.00109881
ALDBSSCT0000008920	ALDBSSCG0000005452	-	Annotated_lncRNA	chr6:64231177-64269575	7.59338	10.2347	-0.430648	0.01505	0.0296477
ALDBSSCT0000000320	ALDBSSCG0000000186	-	Annotated_lncRNA	chr1:155395788-155403534	7.41286	10.269	-0.4702	0.01165	0.0235147
LNC_000207	XLOC_010436	-	Novel_lncRNA	chr1:263444160-263452899	4.74751	10.3331	-1.12203	0.0022	0.00524588
ALDBSSCT0000004069	ALDBSSCG0000002461	-	Annotated_lncRNA	chr14:139223096-139224308	0	10.37	#NAME?	0.00245	0.00578974
ALDBSSCT0000010704	ALDBSSCG0000006483	-	Annotated_lncRNA	chr8:146970278-147020297	52.9428	10.4989	2.33419	5e-05	0.000155633
LNC_000892	XLOC_048221	-	Novel_lncRNA	chr4:43627556-43632678	6.76711	10.719	-0.663559	5e-05	0.000155633
ALDBSSCT0000010894	ALDBSSCG0000006601	-	Annotated_lncRNA	chr8:75370482-75372023	4.82277	10.7511	-1.15655	5e-05	0.000155633
LNC_000833	XLOC_045120	-	Novel_lncRNA	chr3:71012496-71027595	19.4339	10.8233	0.84444	0.00155	0.00381081
ALDBSSCT0000011138	ALDBSSCG0000006756	-	Annotated_lncRNA	chr9:32511838-32566579	7.40347	10.8263	-0.54827	0.011	0.0223636
ALDBSSCT0000008939	ALDBSSCG0000005469	-	Annotated_lncRNA	chr6:76014213-76018041	15.9527	10.8673	0.553804	0.0226	0.0424622
ALDBSSCT0000007945	ALDBSSCG0000004816	-	Annotated_lncRNA	chr4:46416245-46419945	5.25467	10.9201	-1.05531	0.00315	0.00727172
ALDBSSCT0000002356	ALDBSSCG0000001428	-	Annotated_lncRNA	chr12:8799603-8820550	5.66782	10.9491	-0.949946	0.00155	0.00381081
ALDBSSCT0000003958	ALDBSSCG0000002385	-	Annotated_lncRNA	chr14:70773050-70773782	16.2153	10.9644	0.564538	0.00135	0.00336844
LNC_000322	XLOC_016110	-	Novel_lncRNA	chr10:71833305-71857488	6.78988	10.9875	-0.694403	0.0144	0.0285205
ALDBSSCT0000004714	ALDBSSCG0000002868	-	Annotated_lncRNA	chr16:18237637-18284347	5.09132	11.0781	-1.1216	0.02015	0.0384054
ALDBSSCT0000008379	ALDBSSCG0000005091	-	Annotated_lncRNA	chr5:78998330-79090876	7.56072	11.3106	-0.581078	5e-05	0.000155633
ALDBSSCT0000009145	ALDBSSCG0000005574	-	Annotated_lncRNA	chr6:147752784-147757781	19.0629	11.4455	0.735983	5e-05	0.000155633
ALDBSSCT0000005463	ALDBSSCG0000003312	-	Annotated_lncRNA	chr18:14792269-14794714	2.97275	11.4493	-1.94539	5e-05	0.000155633
ENSSSCT00000013243	ENSSSCG00000012108	WWC3	Annotated_lncRNA	chrX:7165906-7328033	8.14886	11.473	-0.493572	0.0001	0.000300888
ALDBSSCT0000007070	ALDBSSCG0000004297	-	Annotated_lncRNA	chr3:25694420-25703624	7.39017	11.4866	-0.63627	0.0001	0.000300888
ALDBSSCT0000002761	ALDBSSCG0000001674	-	Annotated_lncRNA	chr13:111049442-111051195	52.9119	11.9048	2.15205	5e-05	0.000155633
ALDBSSCT0000001478	ALDBSSCG0000000894	-	Annotated_lncRNA	chr10:31420927-31421786	4.1094	12.0178	-1.54818	0.0025	0.00589626
ALDBSSCT0000011463	ALDBSSCG0000006974	-	Annotated_lncRNA	chr9:21859588-21863291	16.2556	12.023	0.435144	0.00325	0.00747375
ENSSSCT00000034217	ENSSSCG00000008496	EIF2AK2	Annotated_lncRNA	chr3:109622368-109667785	45.6446	12.0856	1.91715	5e-05	0.000155633
ALDBSSCT0000011687	ALDBSSCG0000007099	-	Annotated_lncRNA	chr9:132888689-132889330	0	12.1076	#NAME?	5e-05	0.000155633
ALDBSSCT0000011871	ALDBSSCG0000007217	-	Annotated_lncRNA	JH118724.1:72321-74342	16.755	12.1999	0.457721	0.0011	0.00278961
ALDBSSCT0000009254	ALDBSSCG0000005639	-	Annotated_lncRNA	chr6:18527172-18528508	4.12788	12.2197	-1.56573	5e-05	0.000155633
LNC_000716	XLOC_037015	-	Novel_lncRNA	chr18:50104200-50110593	5.38418	12.3593	-1.19879	5e-05	0.000155633
ALDBSSCT0000003099	ALDBSSCG0000001860	-	Annotated_lncRNA	chr13:31135057-31135601	36.1795	12.3809	1.54706	5e-05	0.000155633
ALDBSSCT0000010302	ALDBSSCG0000006263	-	Annotated_lncRNA	chr7:110319997-110352564	3.04218	12.3908	-2.02609	0.0001	0.000300888
ALDBSSCT0000000553	ALDBSSCG0000000328	-	Annotated_lncRNA	chr1:303591822-303626212	5.29487	12.4827	-1.23726	5e-05	0.000155633
ALDBSSCT0000008044	ALDBSSCG0000004882	-	Annotated_lncRNA	chr4:95670867-95689827	28.3186	12.5884	1.16966	5e-05	0.000155633
ALDBSSCT0000003220	ALDBSSCG0000001936	-	Annotated_lncRNA	chr13:86560420-86562722	6.74468	12.6699	-0.909588	5e-05	0.000155633
ALDBSSCT0000006410	ALDBSSCG0000003916	-	Annotated_lncRNA	chr2:121363170-121370570	23.3818	12.7961	0.86968	5e-05	0.000155633
ALDBSSCT0000003968	ALDBSSCG0000002390	-	Annotated_lncRNA	chr14:71960120-71964828	33.9871	12.8886	1.39889	5e-05	0.000155633
ALDBSSCT0000008482	ALDBSSCG0000005157	-	Annotated_lncRNA	chr5:3175299-3176464	36.7641	13.0207	1.49749	5e-05	0.000155633
ALDBSSCT0000003595	ALDBSSCG0000002149	-	Annotated_lncRNA	chr14:49759488-49760671	10.3429	13.239	-0.356149	0.02275	0.0427172
ALDBSSCT0000003143	ALDBSSCG0000001889	-	Annotated_lncRNA	chr13:55516509-55518168	7.89172	13.2658	-0.749304	0.01775	0.0343376
ALDBSSCT0000003741	ALDBSSCG0000002240	-	Annotated_lncRNA	chr14:123490028-123491347	7.35951	13.4127	-0.865922	5e-05	0.000155633
ENSSSCT00000001522	ENSSSCG00000001396	SLA-8	Annotated_lncRNA	chr7:27626974-27630394	6.3305	13.5406	-1.0969	5e-05	0.000155633
ALDBSSCT0000011788	ALDBSSCG0000007149	-	Annotated_lncRNA	GL892291.2:17080-17857	18.4708	13.9332	0.406717	0.0185	0.035612
ALDBSSCT0000000490	ALDBSSCG0000000292	-	Annotated_lncRNA	chr1:267659341-267660158	9.16893	14.091	-0.619947	0.0007	0.00184205
ALDBSSCT0000004281	ALDBSSCG0000002593	-	Annotated_lncRNA	chr15:115151323-115236157	6.16324	14.3314	-1.21742	5e-05	0.000155633
ALDBSSCT0000008940	ALDBSSCG0000005470	-	Annotated_lncRNA	chr6:76018319-76025834	21.5566	14.3556	0.586514	0.00735	0.0156239
ALDBSSCT0000001907	ALDBSSCG0000001154	-	Annotated_lncRNA	chr11:12808485-12814270	53.4804	14.4051	1.89243	0.00595	0.0129107
ALDBSSCT0000000055	ALDBSSCG0000000035	-	Annotated_lncRNA	chr1:18470167-18473816	11.1927	14.4485	-0.368364	0.0059	0.0128131
ALDBSSCT0000008902	ALDBSSCG0000005441	-	Annotated_lncRNA	chr6:58482357-58486214	4.52585	14.4751	-1.67731	5e-05	0.000155633
ALDBSSCT0000005525	ALDBSSCG0000003350	-	Annotated_lncRNA	chr18:42733894-42751353	9.66895	14.7198	-0.606322	0.0013	0.00325226
ALDBSSCT0000000014	ALDBSSCG0000000008	-	Annotated_lncRNA	chr1:3680952-3688877	5.81729	14.7515	-1.34245	0.0005	0.00135038
ENSSSCT00000016750	ENSSSCG00000015375	ITGB8	Annotated_lncRNA	chr9:98589970-98766514	27.3229	14.9107	0.873765	5e-05	0.000155633
ALDBSSCT0000010908	ALDBSSCG0000006610	-	Annotated_lncRNA	chr8:81616691-81631652	7.90923	15.1227	-0.935105	0.00125	0.00313635
ALDBSSCT0000006500	ALDBSSCG0000003971	-	Annotated_lncRNA	chr2:153519246-153527576	10.9096	15.2215	-0.480513	0.0001	0.000300888
ALDBSSCT0000004117	ALDBSSCG0000002479	-	Annotated_lncRNA	chr14:151129748-151166395	10.6884	15.2399	-0.511799	0.0014	0.00348255
ALDBSSCT0000000965	ALDBSSCG0000000592	-	Annotated_lncRNA	chr1:242836552-242837711	40.9563	15.4416	1.40726	5e-05	0.000155633
LNC_001104	XLOC_063395	-	Novel_lncRNA	chr8:127590946-127615930	58.5709	16.074	1.86545	5e-05	0.000155633
ENSSSCT00000033052	ENSSSCG00000031028	CH242-15C8.2	Annotated_lncRNA	chrX:41061658-41063153	11.7329	16.1049	-0.456947	0.0012	0.00302103
ALDBSSCT0000009393	ALDBSSCG0000005727	-	Annotated_lncRNA	chr6:62967915-62978408	127.927	16.3682	2.96635	5e-05	0.000155633
ALDBSSCT0000001517	ALDBSSCG0000000921	-	Annotated_lncRNA	chr10:45718754-45783378	43.1547	16.4669	1.38995	0.0011	0.00278961
LNC_000099	XLOC_004823	-	Novel_lncRNA	GL895666.1:8120-9097	9.12233	16.5533	-0.859648	0.0002	0.000578608
ALDBSSCT0000000264	ALDBSSCG0000000158	-	Annotated_lncRNA	chr1:132625714-132627472	8.19615	16.8057	-1.03593	0.00695	0.0148421
ALDBSSCT0000006478	ALDBSSCG0000003956	-	Annotated_lncRNA	chr2:147192944-147195168	23.3189	17.1727	0.441384	0.00145	0.00359101
ENSSSCT00000033557	ENSSSCG00000030871	CU582909.1	Annotated_lncRNA	chr4:17429473-17517473	30.7785	17.2515	0.835201	5e-05	0.000155633
ALDBSSCT0000001258	ALDBSSCG0000000763	-	Annotated_lncRNA	chr10:51940697-51944511	4.65961	17.3625	-1.8977	5e-05	0.000155633
LNC_000005	XLOC_000382	-	Novel_lncRNA	GL892447.1:45573-46340	29.407	17.4511	0.752847	0.00295	0.00684787
LNC_000113	XLOC_005544	-	Novel_lncRNA	GL896227.2:85971-98454	31.144	17.4557	0.835257	0.00945	0.0195307
ALDBSSCT0000001422	ALDBSSCG0000000860	-	Annotated_lncRNA	chr10:14969585-14976442	33.7785	17.6179	0.939063	5e-05	0.000155633
ALDBSSCT0000001727	ALDBSSCG0000001044	-	Annotated_lncRNA	chr11:22320032-22321646	11.2075	17.7797	-0.665762	0.0001	0.000300888
ALDBSSCT0000007168	ALDBSSCG0000004355	-	Annotated_lncRNA	chr3:52023547-52030784	3.65234	17.8498	-2.28901	5e-05	0.000155633
ALDBSSCT0000010906	ALDBSSCG0000006608	-	Annotated_lncRNA	chr8:80996716-81083144	31.4957	18.2128	0.790205	0.0003	0.000841218
ALDBSSCT0000007674	ALDBSSCG0000004660	-	Annotated_lncRNA	chr4:111540348-111542601	104.014	18.7014	2.47556	5e-05	0.000155633
ALDBSSCT0000007564	ALDBSSCG0000004590	-	Annotated_lncRNA	chr4:73904659-73905895	13.0305	18.8794	-0.534913	0.00075	0.00196127
ALDBSSCT0000011237	ALDBSSCG0000006822	-	Annotated_lncRNA	chr9:70867593-70868740	30.1795	20.2145	0.578173	0.0001	0.000300888
LNC_000465	XLOC_022728	-	Novel_lncRNA	chr13:207420606-207431626	73.9371	20.3106	1.86406	5e-05	0.000155633
LNC_001058	XLOC_061072	-	Novel_lncRNA	chr8:32549712-32553714	29.2155	20.3322	0.522968	5e-05	0.000155633
LNC_000423	XLOC_020556	-	Novel_lncRNA	chr13:18779925-18791165	51.9447	20.3411	1.35258	5e-05	0.000155633
ENSSSCT00000033960	ENSSSCG00000016341	TRAF3IP1	Annotated_lncRNA	chr15:152431431-152441806	10.0258	21.0158	-1.06775	5e-05	0.000155633
ENSSSCT00000004012	ENSSSCG00000003617	TXLNA	Annotated_lncRNA	chr6:82743316-82758576	28.7986	21.0539	0.451914	0.0003	0.000841218
ALDBSSCT0000002412	ALDBSSCG0000001460	-	Annotated_lncRNA	chr12:26667003-26683382	28.37	21.3281	0.411612	0.001	0.00255986
ALDBSSCT0000002482	ALDBSSCG0000001501	-	Annotated_lncRNA	chr12:52123886-52125550	38.0706	21.6882	0.811768	5e-05	0.000155633
ENSSSCT00000005081	ENSSSCG00000004600	CH242-58J12.2	Annotated_lncRNA	chr1:126842174-127433537	46.3871	21.8685	1.08487	5e-05	0.000155633
ALDBSSCT0000006180	ALDBSSCG0000003778	-	Annotated_lncRNA	chr2:12903560-12911272	31.429	22.0344	0.512338	0.0043	0.00963543
ALDBSSCT0000002609	ALDBSSCG0000001587	-	Annotated_lncRNA	chr13:33878496-33888233	15.6252	22.172	-0.504864	0.02205	0.0415592
ALDBSSCT0000004067	ALDBSSCG0000002459	-	Annotated_lncRNA	chr14:139034757-139051363	16.0219	22.286	-0.476092	0.02395	0.0447087
ALDBSSCT0000002392	ALDBSSCG0000001450	-	Annotated_lncRNA	chr12:20388990-20389633	10.8371	22.4337	-1.04969	0.00395	0.00892689
ALDBSSCT0000011769	ALDBSSCG0000007136	-	Annotated_lncRNA	chr9:148558386-148568813	33.0906	22.6576	0.546428	5e-05	0.000155633
LNC_000051	XLOC_002712	-	Novel_lncRNA	GL894015.1:8661-12533	16.2626	23.0256	-0.501684	0.002	0.00481179
ENSSSCT00000035807	ENSSSCG00000031038	MORC4	Annotated_lncRNA	chrX:101815817-101816384	7.75339	23.755	-1.61533	5e-05	0.000155633
LNC_000916	XLOC_049683	-	Novel_lncRNA	chr5:8594170-8599150	7.85962	23.9071	-1.60491	5e-05	0.000155633
ALDBSSCT0000008529	ALDBSSCG0000005190	-	Annotated_lncRNA	chr5:23100500-23102266	12.032	24.068	-1.00024	5e-05	0.000155633
ALDBSSCT0000004760	ALDBSSCG0000002897	-	Annotated_lncRNA	chr16:38491012-38492742	62.6499	24.3816	1.36152	5e-05	0.000155633
ALDBSSCT0000007047	ALDBSSCG0000004287	-	Annotated_lncRNA	chr3:19939740-19945968	121.075	24.722	2.29204	0.0001	0.000300888
ALDBSSCT0000000805	ALDBSSCG0000000489	-	Annotated_lncRNA	chr1:128898939-128913482	17.4675	24.8315	-0.507494	0.00665	0.0142812
ALDBSSCT0000003304	ALDBSSCG0000001986	-	Annotated_lncRNA	chr13:141254267-141257694	62.0101	25.4236	1.28633	5e-05	0.000155633
ALDBSSCT0000000910	ALDBSSCG0000000556	-	Annotated_lncRNA	chr1:204871941-204878724	36.7702	25.4252	0.532279	5e-05	0.000155633
LNC_000084	XLOC_004228	-	Novel_lncRNA	GL895108.1:14005-24207	61.8371	25.5828	1.2733	0.0189	0.0362886
ALDBSSCT0000008272	ALDBSSCG0000005020	-	Annotated_lncRNA	chr5:15824341-15854639	92.4093	25.8202	1.83954	5e-05	0.000155633
LNC_000782	XLOC_041951	-	Novel_lncRNA	chr2:143856229-143907415	43.2671	26.0473	0.732135	0.0006	0.00159881
ALDBSSCT0000008507	ALDBSSCG0000005173	-	Annotated_lncRNA	chr5:11962121-11963744	35.663	26.0578	0.452717	0.0004	0.00109881
ALDBSSCT0000009081	ALDBSSCG0000005541	-	Annotated_lncRNA	chr6:125811820-125857266	65.9275	26.3806	1.3214	0.0003	0.000841218
ALDBSSCT0000005312	ALDBSSCG0000003216	-	Annotated_lncRNA	chr17:29866785-29870712	35.4722	26.5902	0.415794	0.0169	0.0328845
ALDBSSCT0000008637	ALDBSSCG0000005257	-	Annotated_lncRNA	chr5:83802698-83804744	43.0673	27.0187	0.672631	5e-05	0.000155633
ALDBSSCT0000002870	ALDBSSCG0000001743	-	Annotated_lncRNA	chr13:159025260-159139311	2.34024	27.1367	-3.53551	5e-05	0.000155633
ALDBSSCT0000004851	ALDBSSCG0000002945	-	Annotated_lncRNA	chr16:78119273-78129719	11.1972	27.2297	-1.28205	5e-05	0.000155633
LNC_000686	XLOC_034311	-	Novel_lncRNA	chr17:41941058-41966921	130.598	27.8897	2.22733	0.0086	0.0179767
ALDBSSCT0000007158	ALDBSSCG0000004353	-	Annotated_lncRNA	chr3:51428336-51492277	42.3863	28.5671	0.569243	0.0009	0.00232442
LNC_000134	XLOC_006555	-	Novel_lncRNA	GL896538.1:10100-13643	109.129	28.7478	1.92451	0.0004	0.00109881
ALDBSSCT0000003915	ALDBSSCG0000002354	-	Annotated_lncRNA	chr14:52322074-52323011	112.434	29.1233	1.94884	0.00015	0.000441639
LNC_000679	XLOC_033864	-	Novel_lncRNA	chr17:10416089-10421425	54.8665	29.3042	0.90482	5e-05	0.000155633
ENSSSCT00000036410	ENSSSCG00000012774	DUSP9	Annotated_lncRNA	chrX:141968376-141977757	6.38146	29.6303	-2.21512	5e-05	0.000155633
ALDBSSCT0000005151	ALDBSSCG0000003106	-	Annotated_lncRNA	chr17:36275201-36282755	18.1478	29.9622	-0.723353	5e-05	0.000155633
ALDBSSCT0000008293	ALDBSSCG0000005036	-	Annotated_lncRNA	chr5:26710367-26807270	122.715	30.4358	2.01147	5e-05	0.000155633
ALDBSSCT0000002357	ALDBSSCG0000001428	-	Annotated_lncRNA	chr12:8799603-8820550	41.8007	31.3545	0.414854	0.0023	0.00545969
ALDBSSCT0000005173	ALDBSSCG0000003123	-	Annotated_lncRNA	chr17:46934438-46935439	65.2404	32.3807	1.01063	5e-05	0.000155633
LNC_000404	XLOC_018992	-	Novel_lncRNA	chr12:62605514-62609441	20.8871	32.4505	-0.635628	5e-05	0.000155633
ALDBSSCT0000004516	ALDBSSCG0000002747	-	Annotated_lncRNA	chr15:84786645-84787181	0	32.8457	#NAME?	5e-05	0.000155633
ALDBSSCT0000005130	ALDBSSCG0000003087	-	Annotated_lncRNA	chr17:14861569-15040941	117.967	33.7727	1.80445	5e-05	0.000155633
ALDBSSCT0000003914	ALDBSSCG0000002353	-	Annotated_lncRNA	chr14:51015688-51017214	13.8939	34.5327	-1.31352	0.00095	0.00244511
ALDBSSCT0000004447	ALDBSSCG0000002711	-	Annotated_lncRNA	chr15:53516557-53584877	15.0595	34.6838	-1.20359	5e-05	0.000155633
ALDBSSCT0000002654	ALDBSSCG0000001615	-	Annotated_lncRNA	chr13:68135141-68138574	59.7258	34.8612	0.776731	5e-05	0.000155633
ALDBSSCT0000000366	ALDBSSCG0000000220	-	Annotated_lncRNA	chr1:185125063-185153008	49.7552	35.4443	0.489293	0.01725	0.0334894
ALDBSSCT0000010693	ALDBSSCG0000006476	-	Annotated_lncRNA	chr8:145176541-145179345	18.9733	36.3411	-0.937634	5e-05	0.000155633
ALDBSSCT0000002757	ALDBSSCG0000001672	-	Annotated_lncRNA	chr13:107046763-107049932	22.0615	36.3564	-0.72068	5e-05	0.000155633
ALDBSSCT0000002779	ALDBSSCG0000001685	-	Annotated_lncRNA	chr13:117682948-117684859	89.8157	37.1182	1.27484	0.00135	0.00336844
ALDBSSCT0000009749	ALDBSSCG0000005948	-	Annotated_lncRNA	chr7:44057390-44076573	231.55	37.1212	2.64101	5e-05	0.000155633
LNC_000097	XLOC_004740	-	Novel_lncRNA	GL895557.1:0-1310	23.9761	39.6274	-0.724902	5e-05	0.000155633
ENSSSCT00000036444	ENSSSCG00000007280	ITCH	Annotated_lncRNA	chr17:43030474-43114974	66.4825	40.4468	0.716946	5e-05	0.000155633
ALDBSSCT0000010892	ALDBSSCG0000006599	-	Annotated_lncRNA	chr8:74840310-74846715	17.772	41.0991	-1.2095	5e-05	0.000155633
ALDBSSCT0000011298	ALDBSSCG0000006861	-	Annotated_lncRNA	chr9:115582813-115602155	56.1914	41.187	0.44816	0.00965	0.0199028
LNC_000223	XLOC_011573	-	Novel_lncRNA	chr1:39601843-39602370	20.3185	41.409	-1.02715	0.0102	0.0209099
ALDBSSCT0000000914	ALDBSSCG0000000560	-	Annotated_lncRNA	chr1:206904041-206908648	53.5764	41.8148	0.357583	0.00315	0.00727172
ALDBSSCT0000002830	ALDBSSCG0000001724	-	Annotated_lncRNA	chr13:143232212-143236928	21.4049	44.8023	-1.06563	0.00015	0.000441639
LNC_000480	XLOC_023341	-	Novel_lncRNA	chr13:38014851-38020522	63.5581	45.8849	0.470058	0.0252	0.0466782
ALDBSSCT0000000911	ALDBSSCG0000000557	-	Annotated_lncRNA	chr1:205104992-205124296	149.127	46.1672	1.69161	0.0013	0.00325226
ALDBSSCT0000008302	ALDBSSCG0000005043	-	Annotated_lncRNA	chr5:36601784-36602762	20.7926	46.4703	-1.16024	0.00895	0.018613
ALDBSSCT0000005932	ALDBSSCG0000003623	-	Annotated_lncRNA	chr2:77764460-77776005	195.986	46.755	2.06756	5e-05	0.000155633
ENSSSCT00000036045	ENSSSCG00000004943	MAP2K1	Annotated_lncRNA	chr1:182181553-182222849	73.2314	48.3506	0.59893	5e-05	0.000155633
ALDBSSCT0000001327	ALDBSSCG0000000810	-	Annotated_lncRNA	chr10:70856794-70857675	139.186	49.9645	1.47804	5e-05	0.000155633
LNC_000581	XLOC_028558	-	Novel_lncRNA	chr14:116348752-116369195	142.856	50.1295	1.51083	5e-05	0.000155633
ALDBSSCT0000004214	ALDBSSCG0000002548	-	Annotated_lncRNA	chr15:75585083-75626448	38.1631	51.2964	-0.42668	0.00195	0.00470094
ALDBSSCT0000003730	ALDBSSCG0000002232	-	Annotated_lncRNA	chr14:117938848-118004721	139.604	54.9452	1.34527	0.0008	0.00208292
ALDBSSCT0000000087	ALDBSSCG0000000052	-	Annotated_lncRNA	chr1:31017964-31137080	39.3823	56.6314	-0.524054	0.016	0.0312688
ALDBSSCT0000006773	ALDBSSCG0000004136	-	Annotated_lncRNA	chr3:81815275-81817071	719.17	58.6198	3.61687	0.0001	0.000300888
ALDBSSCT0000007865	ALDBSSCG0000004760	-	Annotated_lncRNA	chr4:9144984-9146322	40.1954	60.0207	-0.578429	0.0016	0.0039214
ALDBSSCT0000006328	ALDBSSCG0000003870	-	Annotated_lncRNA	chr2:74635387-74641394	140.266	64.1153	1.12943	0.01495	0.0294766
LNC_000073	XLOC_003796	-	Novel_lncRNA	GL894700.2:2-1711	48.0537	64.3347	-0.420949	0.0015	0.00370106
ALDBSSCT0000000444	ALDBSSCG0000000267	-	Annotated_lncRNA	chr1:238398021-238507678	41.9143	68.7065	-0.713005	0.00185	0.00448152
ALDBSSCT0000001462	ALDBSSCG0000000882	-	Annotated_lncRNA	chr10:22943191-22944504	142.977	74.0377	0.949452	5e-05	0.000155633
ALDBSSCT0000000795	ALDBSSCG0000000481	-	Annotated_lncRNA	chr1:120698325-121032009	54.2725	76.2115	-0.489788	0.0039	0.00882277
ALDBSSCT0000011581	ALDBSSCG0000007032	-	Annotated_lncRNA	chr9:72663395-72666726	54.6363	90.3023	-0.724903	5e-05	0.000155633
ENSSSCT00000018610	ENSSSCG00000017092	GPX3	Annotated_lncRNA	chr16:78282293-78290916	59.1141	91.8427	-0.635662	5e-05	0.000155633
ALDBSSCT0000000482	ALDBSSCG0000000287	-	Annotated_lncRNA	chr1:264741508-264753018	179.829	96.4073	0.89941	0.02225	0.0418703
ALDBSSCT0000005655	ALDBSSCG0000003430	-	Annotated_lncRNA	chr18:15475638-15487755	36.8163	106.646	-1.53441	5e-05	0.000155633
LNC_000037	XLOC_002259	-	Novel_lncRNA	GL893779.1:1-330	553.632	112.366	2.30073	5e-05	0.000155633
LNC_000123	XLOC_005816	-	Novel_lncRNA	GL896302.1:11875-13290	693.905	115.787	2.58327	5e-05	0.000155633
ALDBSSCT0000011315	ALDBSSCG0000006872	-	Annotated_lncRNA	chr9:127640359-127641469	338.95	120.242	1.49513	0.0001	0.000300888
ALDBSSCT0000011084	ALDBSSCG0000006726	-	Annotated_lncRNA	chr9:10966569-10971281	83.3808	142.332	-0.771471	5e-05	0.000155633
ALDBSSCT0000005768	ALDBSSCG0000003504	-	Annotated_lncRNA	chr2:1415103-1416537	409.486	166.479	1.29848	0.00115	0.00290779
ALDBSSCT0000004957	ALDBSSCG0000003000	-	Annotated_lncRNA	chr16:42881400-42882711	133.664	172.404	-0.367189	0.0091	0.0188703
ALDBSSCT0000005939	ALDBSSCG0000003629	-	Annotated_lncRNA	chr2:81298319-81299971	374.77	179.201	1.06442	5e-05	0.000155633
ALDBSSCT0000007063	ALDBSSCG0000004294	-	Annotated_lncRNA	chr3:24272677-24280784	484.865	183.168	1.40442	5e-05	0.000155633
ALDBSSCT0000004590	ALDBSSCG0000002792	-	Annotated_lncRNA	chr15:122882409-122883897	96.1398	189.361	-0.977937	0.00025	0.000710668
LNC_000482	XLOC_023372	-	Novel_lncRNA	chr13:43450555-43455163	878.242	203.163	2.11198	5e-05	0.000155633
ALDBSSCT0000011526	ALDBSSCG0000007003	-	Annotated_lncRNA	chr9:46890870-46892035	142.919	204.786	-0.518926	5e-05	0.000155633
LNC_000210	XLOC_011031	-	Novel_lncRNA	chr1:310241014-310241641	548.372	231.963	1.24126	5e-05	0.000155633
LNC_000250	XLOC_012988	-	Novel_lncRNA	chr1:200589506-200695217	595.116	250.535	1.24816	0.00325	0.00747375
ALDBSSCT0000006646	ALDBSSCG0000004065	-	Annotated_lncRNA	chr3:40058932-40063268	784.663	332.744	1.23766	5e-05	0.000155633
ALDBSSCT0000002026	ALDBSSCG0000001222	-	Annotated_lncRNA	chr11:72064787-72066470	118.056	344.77	-1.54616	5e-05	0.000155633
ALDBSSCT0000000398	ALDBSSCG0000000231	-	Annotated_lncRNA	chr1:201795312-201814332	1148.41	347.846	1.72311	5e-05	0.000155633
ALDBSSCT0000003424	ALDBSSCG0000002062	-	Annotated_lncRNA	chr13:213109034-213109780	600.921	1480.92	-1.30125	5e-05	0.000155633

## Sheet: Sheet2
transcript_id	gene_id	gene_name	Status	gene_location	PS_FPKM	ST_FPKM	log2(foldchange)	pvalue	qvalue
LNC_000519	XLOC_025379	-	Novel_lncRNA	chr14:813524-815221	0.632021	0	inf	5e-05	0.000155633
LNC_000520	XLOC_025380	-	Novel_lncRNA	chr14:815702-817199	0.664909	0	inf	5e-05	0.000155633
LNC_001030	XLOC_058627	-	Novel_lncRNA	chr7:113830361-113831532	0.696673	0	inf	5e-05	0.000155633
LNC_001155	XLOC_066215	-	Novel_lncRNA	chr9:45945041-45950007	1.15413	0	inf	5e-05	0.000155633
LNC_000604	XLOC_029452	-	Novel_lncRNA	chr15:52793841-52797011	1.18014	0	inf	0.00485	0.0107445
LNC_000384	XLOC_017942	-	Novel_lncRNA	chr12:13737951-13742052	1.31737	0	inf	5e-05	0.000155633
LNC_000737	XLOC_038865	-	Novel_lncRNA	chr2:101245919-101248963	1.34642	0	inf	5e-05	0.000155633
LNC_000553	XLOC_027550	-	Novel_lncRNA	chr14:39208929-39216190	1.39484	0	inf	5e-05	0.000155633
LNC_000819	XLOC_044015	-	Novel_lncRNA	chr3:139267006-139282559	1.44203	0	inf	5e-05	0.000155633
LNC_000781	XLOC_041789	-	Novel_lncRNA	chr2:124508119-124510327	1.70096	0	inf	5e-05	0.000155633
LNC_000707	XLOC_035736	-	Novel_lncRNA	chr18:6871785-6872515	92.5229	0	inf	5e-05	0.000155633
LNC_000034	XLOC_001829	-	Novel_lncRNA	GL893581.2:69837-70266	686.329	0	inf	5e-05	0.000155633

## Sheet: Sheet3
transcript_id	gene_id	gene_name	Status	gene_location	PS_FPKM	ST_FPKM	log2(foldchange)	pvalue	qvalue
ALDBSSCT0000007423	ALDBSSCG0000004498	-	Annotated_lncRNA	chr4:6694716-6700193	0	1.95198	#NAME?	0.0264	0.0486302
ALDBSSCT0000008741	ALDBSSCG0000005334	-	Annotated_lncRNA	chr6:12314946-12322156	0	1.34644	#NAME?	0.01845	0.0355272
ALDBSSCT0000006138	ALDBSSCG0000003751	-	Annotated_lncRNA	chr2:3880158-3880641	0	1.68473	#NAME?	0.01045	0.0213639
ALDBSSCT0000005086	ALDBSSCG0000003065	-	Annotated_lncRNA	chr16:82411092-82413437	0	2.73083	#NAME?	0.00935	0.0193419
ALDBSSCT0000006065	ALDBSSCG0000003713	-	Annotated_lncRNA	chr2:147267920-147272588	0	1.14971	#NAME?	0.005	0.0110347
ALDBSSCT0000011141	ALDBSSCG0000006758	-	Annotated_lncRNA	chr9:34636585-34856669	0	5.29968	#NAME?	0.00485	0.0107445
ALDBSSCT0000011173	ALDBSSCG0000006783	-	Annotated_lncRNA	chr9:51592747-51594606	0	3.77988	#NAME?	0.00265	0.00621819
ALDBSSCT0000004069	ALDBSSCG0000002461	-	Annotated_lncRNA	chr14:139223096-139224308	0	10.37	#NAME?	0.00245	0.00578974
ALDBSSCT0000004377	ALDBSSCG0000002657	-	Annotated_lncRNA	chr15:157445357-157447780	0	3.46082	#NAME?	0.0022	0.00524588
ALDBSSCT0000005145	ALDBSSCG0000003100	-	Annotated_lncRNA	chr17:31315684-31364884	0	3.16395	#NAME?	0.0012	0.00302103
ALDBSSCT0000011083	ALDBSSCG0000006725	-	Annotated_lncRNA	chr9:10956024-10964155	0	2.6379	#NAME?	0.0005	0.00135038
LNC_001055	XLOC_060919	-	Novel_lncRNA	chr8:10052142-10053518	0	0.697471	#NAME?	0.0001	0.000300888
LNC_001042	XLOC_059631	-	Novel_lncRNA	chr7:52597753-52603768	0	3.76321	#NAME?	0.0001	0.000300888
LNC_000534	XLOC_026640	-	Novel_lncRNA	chr14:104011938-104270645	0	1.15031	#NAME?	5e-05	0.000155633
LNC_000107	XLOC_005341	-	Novel_lncRNA	GL896148.1:16209-19109	0	2.35769	#NAME?	5e-05	0.000155633
LNC_000914	XLOC_049613	-	Novel_lncRNA	chr5:6302785-6315655	0	1.44327	#NAME?	5e-05	0.000155633
ALDBSSCT0000011687	ALDBSSCG0000007099	-	Annotated_lncRNA	chr9:132888689-132889330	0	12.1076	#NAME?	5e-05	0.000155633
ALDBSSCT0000000326	ALDBSSCG0000000190	-	Annotated_lncRNA	chr1:163117060-163154667	0	2.43086	#NAME?	5e-05	0.000155633
ALDBSSCT0000009334	ALDBSSCG0000005693	-	Annotated_lncRNA	chr6:51341553-51347518	0	0.619174	#NAME?	5e-05	0.000155633
ALDBSSCT0000004516	ALDBSSCG0000002747	-	Annotated_lncRNA	chr15:84786645-84787181	0	32.8457	#NAME?	5e-05	0.000155633
